# Supplementary material for: The efficient conversion of H2S into mercaptan alcohols mediated in protic ionic liquids under mild conditions
Source: Royal Society of Chemistry journal article supplement (doi:10.1039/d1gc02829d), 2021-01-01
Supplement: d1gc02829d1.pdf [file d1gc02829d1.pdf]

## *Supporting information*

### **The efficient conversion of H<sub>2</sub>S into mercaptan alcohols mediated in protic ionic liquids under mild condition**

Wenjie Xiong <sup>a</sup>, Mingzhen Shi <sup>a</sup>, Xiaomin Zhang <sup>a,b,\*</sup>, Zhuoheng Tu <sup>a</sup>, Xingbang Hu <sup>a,b</sup>, Youting Wu <sup>a,b,\*</sup>

<sup>a</sup> Key Laboratory of Mesoscopic Chemistry of MOE, School of Chemistry and Chemical Engineering, Nanjing University, Nanjing 210023, P.R. China.

<sup>b</sup> Yuxiu Postdoctoral Institute, Nanjing University, Nanjing 210023, P.R. China

\* Corresponding author: xmzhang@nju.edu.cn; ytwu@nju.edu.cn

## **Experimental**

### **Materials and instruments**

The specifications and sources of the chemicals used in this work are summarized in **Table S1**. All reagents were used without further purification. NMR spectra was obtained on a Bruker DPX 400 MHz spectrometer with CDCl<sub>3</sub> as internal standard solvent at ambient temperature. FT-IR spectra was carried out on Nicolet iS50 infrared spectrometer, with the spectral resolution and the number of scans of 4 cm<sup>-1</sup> and 32, respectively. Conversion and selectivity of epoxides were determined by HPLC analysis. ESI-MS was used to characterize the molecular weight of the product at m/z.

### **Preparation and Characterization of PILs**

These PILs were synthesized by neutralization reaction. Taking a typical run, 50 mL of the ethanol solution of MeOAc (20 mmol) was added dropwisely to the ethanol solution of BDMAEE (25 mmol). The reaction was stirred in an ice bath until it was raised to room temperature and stirred

for 12 hours. Then, ethanol was removed by vacuum distillation and the remaining crude product was washed three times by diethyl ether to remove the excess reactant. The product was dried in a vacuum at 60 °C for 24 hours to remove trace solvents, and finally, a clear liquid [BDMAEEH][MeOAc] was obtained.

### **The typical experiment of epoxides with H<sub>2</sub>S**

In a typical run, styrene oxide (1.0 g, 8.3 mmol) in a reaction vessel. The amount of catalyst is 0.1 Equiv. of the reactant and the condition of cycloaddition are 30 °C and 2 hours. Pure mercaptan alcohol was obtained by thin-layer chromatography (TLC) with petroleum ether (PE) and ethyl acetate (EA) as eluent (3:1). The structures of mercaptan alcohol were verified by <sup>1</sup>H and <sup>13</sup>C NMR spectra with CDCl<sub>3</sub> as solvent.

### **Determination of H<sub>2</sub>S Absorption**

The whole absorption equipment consists of a water bath, a pressure recording system and two 316L stainless steel chambers whose volumes 119.871 cm<sup>3</sup> (V<sub>1</sub>) and 48.854 cm<sup>3</sup> (V<sub>2</sub>), respectively. The big chamber, named as gas reservoir, are used to isolate H<sub>2</sub>S before it contacts with the IL sample in the small chamber, which is equipped with a magnetic stirrer and used as equilibrium cell. The temperature (*T*) of both chambers is controlled by the water bath with an accuracy of ±0.1K. The pressures in the two chambers are monitored online using two pressure transducers (Wideplus Precision Instruments) which are linked to a Numeric Instrument (WP-D821-200-1212—N-2P). The uncertainty of the pressure recording system is ±0.2% in relation to the full scale. In a typical run, a known mass (*w*) of IL sample was placed into the equilibrium cell. Then the air in the two chambers was evacuated (<10 Pa). While the two chambers were separated using a needle valve, H<sub>2</sub>S was fed into the gas reservoir from gas cylinder to a pressure of *P*<sub>1</sub> and the equilibrium cell was recorded to be *P*<sub>0</sub>. The needle valve between the two chambers was turned on to let H<sub>2</sub>S be introduced to

equilibrium cell. Absorption equilibrium was thought to be obtained when the pressures of the two chambers remained constant for at least 2 h. The equilibrium pressures were denoted as  $P_2$  for the equilibrium cell and  $P_1'$  for the gas reservoir. The  $H_2S$  partial pressure in the equilibrium cell was  $P_S = P_2 - P_0$ . The  $H_2S$  uptake,  $n(P_S)$ , can thus be calculated using the following equation

$$n(P_S) = \rho_g(P_1, T)V_1 - \rho_g(P_1', T)V_1 - \rho_g(P_S, T)(V_2 - \omega / \rho_{IL}) \quad (S1)$$

Where  $\rho_g(P_i, T)$  represents the density of  $H_2S$  in mol/cm<sup>3</sup> at  $P_i$  ( $i=1, S$ ) and  $\rho_{IL}$  is the density of the ionic liquid sample in g/cm<sup>3</sup> at  $T$ .  $V_1$  and  $V_2$  represent the volumes in cm<sup>3</sup> of the two chambers. Subsequent determination of solubility data at elevated pressures were performed by introducing more  $H_2S$  into the equilibrium cell to reach new equilibrium.

**Table S1.** Specifications and sources of chemicals used in this work.

| Molecular structure                                                                 | Chemical name            | CAS registry number | MW. (g/mol) | Mass            | Source  |
|-------------------------------------------------------------------------------------|--------------------------|---------------------|-------------|-----------------|---------|
|                                                                                     |                          |                     |             | fraction purity |         |
| 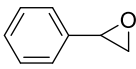 | Styrene Oxide            | 96-09-3             | 120.15      | 0.98            | Adamas  |
|  | Ethylene Oxide           | 75-56-9             | 58.08       | 0.99            | Adamas  |
|  | Glycidyl phenyl ether    | 122-60-1            | 150.17      | 0.98            | Macklin |
|  | Benzyl Glycidyl Ether    | 89616-40-0          | 164.20      | 0.97            | Macklin |
|  | Glycidyl Isopropyl Ether | 4016-14-2           | 116.16      | 0.96            | Aladdin |
|  | Furfuryl glycidyl ether  | 5380-87-0           | 154.16      | 0.96            | Aladdin |
|  | Cyclohexene oxide        | 286-20-4            | 98.14       | 0.98            | Aladdin |
|  | Allyl glycidyl ether     | 106-92-3            | 114.14      | 0.99            | Adamas  |
|  | 2-hexyl-oxirane          | 2984-50-1           | 128.21      | 0.97            | Adamas  |

|                                                                                     |                                               |             |        |      |         |
|-------------------------------------------------------------------------------------|-----------------------------------------------|-------------|--------|------|---------|
| 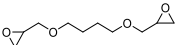   | 1,4-Butanediol diglycidyl ether               | 2425-79-8   | 202.25 | 0.95 | Aladdin |
|    | o-Cresyl glycidyl ether                       | 2210-79-9   | 164.20 | 0.90 | Aladdin |
|    | trans-Stilbene oxide                          | 1439-07-2   | 196.24 | 0.98 | Aladdin |
|    | Tert-butyl glycidyl ether                     | 7665-72-7   | 130.19 | 0.96 | Aladdin |
|    | 4,4-dimethyl-3,5,8-trioxabicyclo[5.1.0]octane | 57280-22-5  | 144.17 | 0.99 | Adamas  |
|    | Trityl glycidyl ether                         | 129940-50-7 | 316.39 | 0.98 | Adamas  |
|    | 1,2-Epoxy-5-hexene                            | 10353-53-4  | 98.14  | 0.96 | Aladdin |
|    | ethyl oxirane-2-carboxylate                   | 4660-80-4   | 116.12 | 0.98 | Adamas  |
|   | 3,4-Epoxytetrahydrofuran                      | 285-69-8    | 86.09  | 0.97 | Adamas  |
|  | 2-phenylpropylene oxide                       | 2085-88-3   | 134.18 | 0.95 | Macklin |
|  | Cyclopentene oxide                            | 285-67-6    | 84.12  | 0.98 | Adamas  |
|  | 3,4-Epoxy-1-butene                            | 930-22-3    | 70.09  | 0.98 | Aladdin |
|  | Ethyl 3-phenylglycidate                       | 121-39-1    | 192.21 | 0.90 | Macklin |
|  | Methoxyacetic Acid                            | 625-45-6    | 90.08  | 0.98 | Macklin |
|  | Bis(2-dimethylaminoethyl) ether               | 3033-62-3   | 160.26 | 0.98 | Adamas  |
|  | 1-ethyl-3-methylimidazolium acetate           | 143314-17-4 | 170.21 | 0.98 | Adamas  |
|  | N,N,N',N'-tetramethylethylenediamine          | 110-18-9    | 116.21 | 0.99 | Adamas  |
|  | N,N,N',N'-Tetramethyl-1,3-propanediamine      | 110-95-2    | 130.23 | 0.98 | Adamas  |

|                                                                                   |                              |            |        |       |            |
|-----------------------------------------------------------------------------------|------------------------------|------------|--------|-------|------------|
| 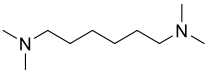 | 1,6-bis(dimethylamino)Hexane | 111-18-2   | 172.31 | 0.98  | Adamas     |
|  | 2-Dimethylaminoethylamine    | 108-00-9   | 88.15  | 0.99  | Aladdin    |
|  | 3-Dimethylaminopropylamine   | 109-55-7   | 102.18 | 0.99  | Aladdin    |
|  | 3-Diethylaminopropylamine    | 104-78-9   | 130.23 | 0.99  | Adamas     |
|  | 4-Fluorophenol               | 371-41-5   | 112.10 | 0.98  | Adamas     |
|  | picolinic acid               | 98-98-6    | 123.11 | 0.97  | Adamas     |
| HBr                                                                               | Hydrogen bromide             | 10035-10-6 | 80.91  | 0.40  | in Nanjing |
|                                                                                   |                              |            |        | water | reagent    |
| HI                                                                                | Hydroiodic acid              | 10034-85-2 | 127.91 | 0.45  | in Nanjing |
|                                                                                   |                              |            |        | water | reagent    |
| CH <sub>3</sub> I                                                                 | Iodomethane                  | 74-88-4    | 141.94 | 0.98  | Adamas     |

H<sub>2</sub>S was purchased from Nanjing Tianze Gas Co., Ltd.

---

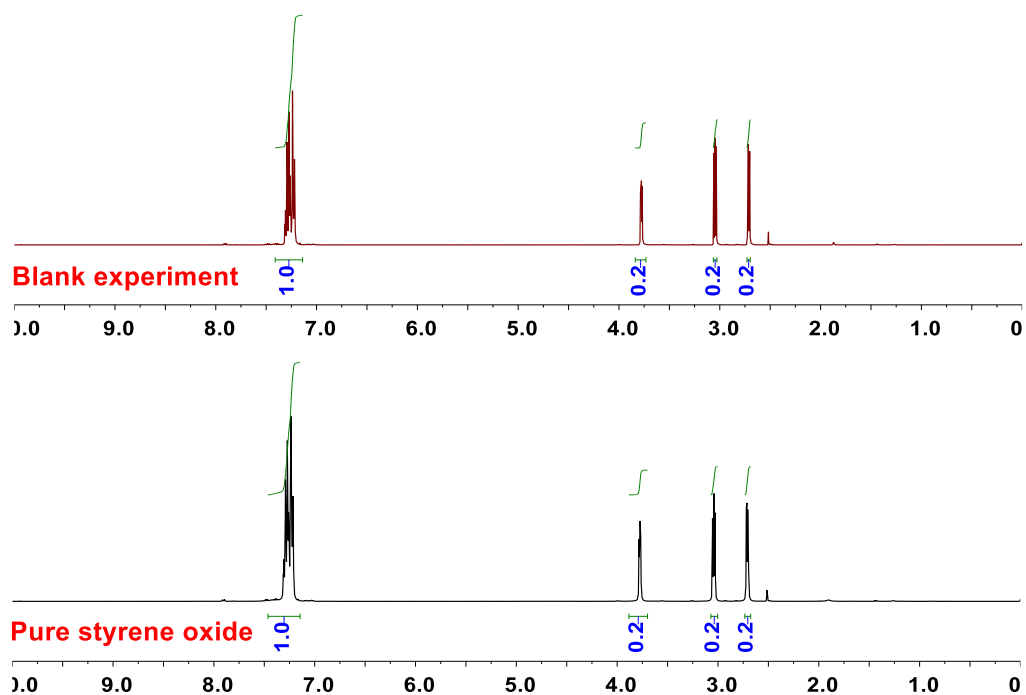

**Figure S1.**  $^1\text{H}$  NMR of styrene oxide (**1a**) after and before reaction with  $\text{H}_2\text{S}$  in the absence of catalyst.

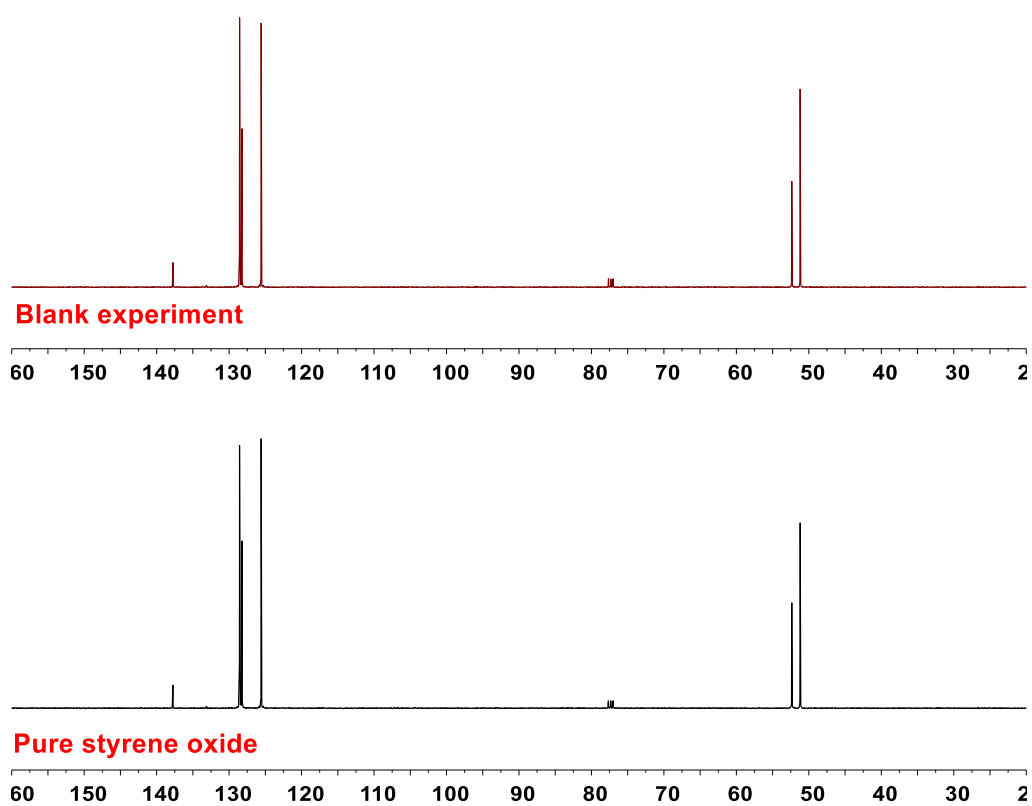

**Figure S2.**  $^{13}\text{C}$  NMR of styrene oxide (**1a**) after and before reaction with  $\text{H}_2\text{S}$  in the absence of the catalyst.

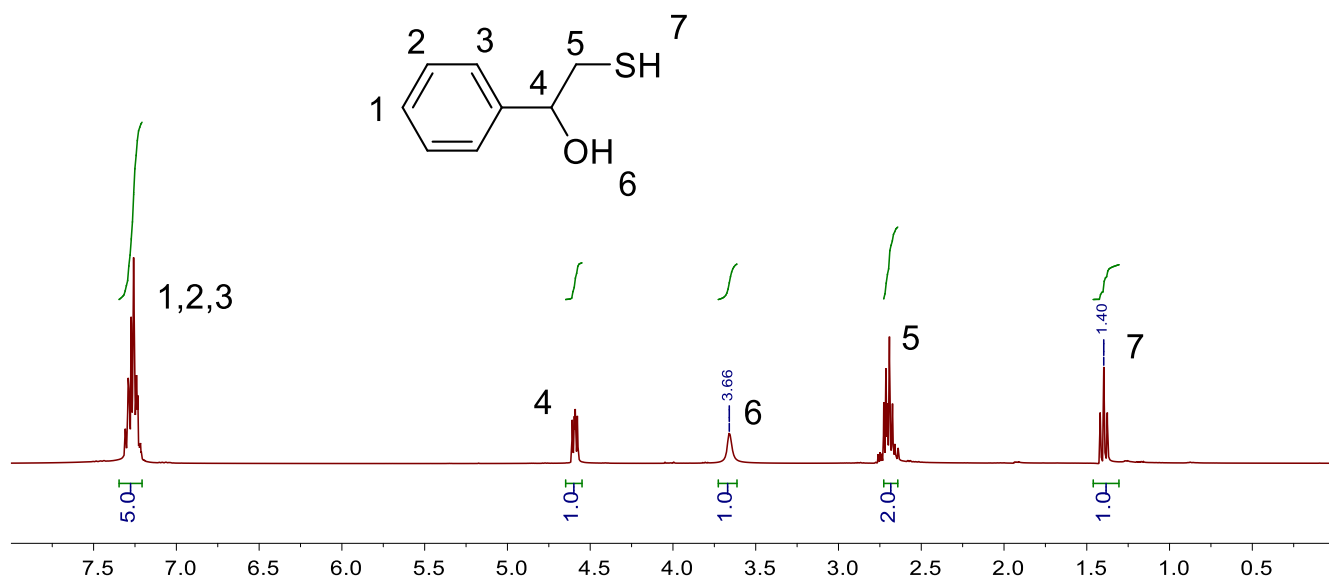

**Figure S3.** <sup>1</sup>H NMR of 2-mercapto-1-phenylethan-1-ol (**1b**).

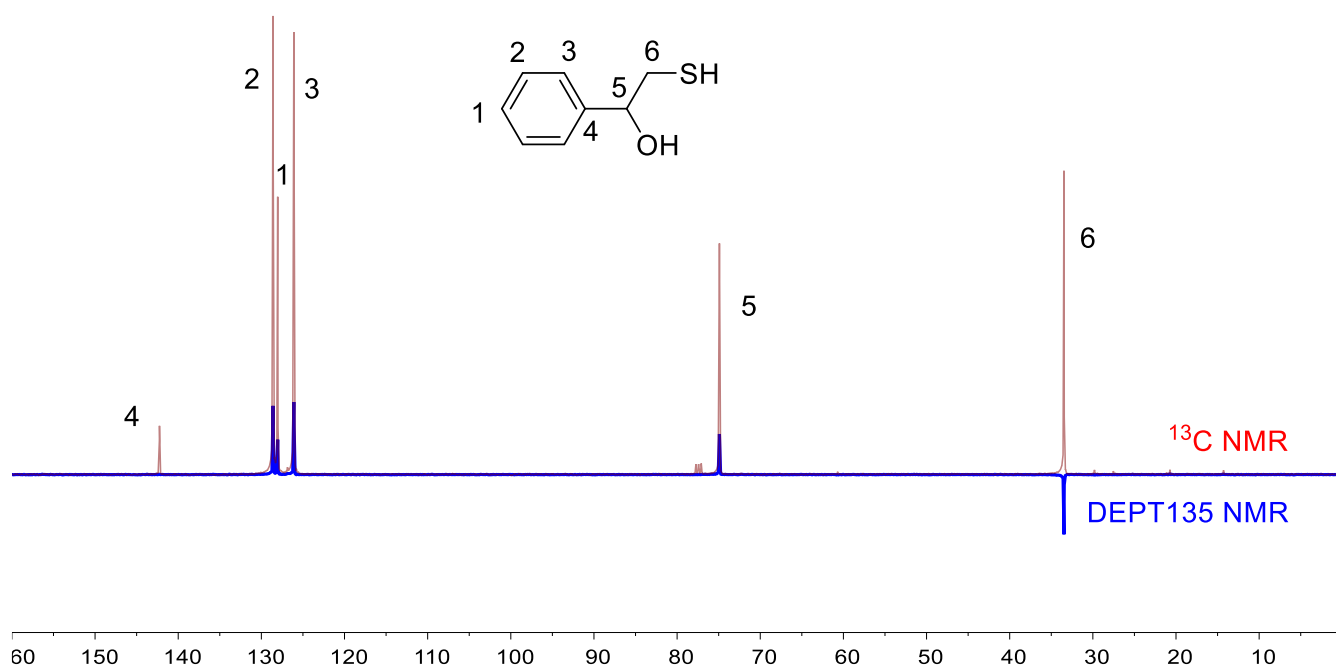

**Figure S4.** <sup>13</sup>C NMR of 2-mercapto-1-phenylethan-1-ol (**1b**).

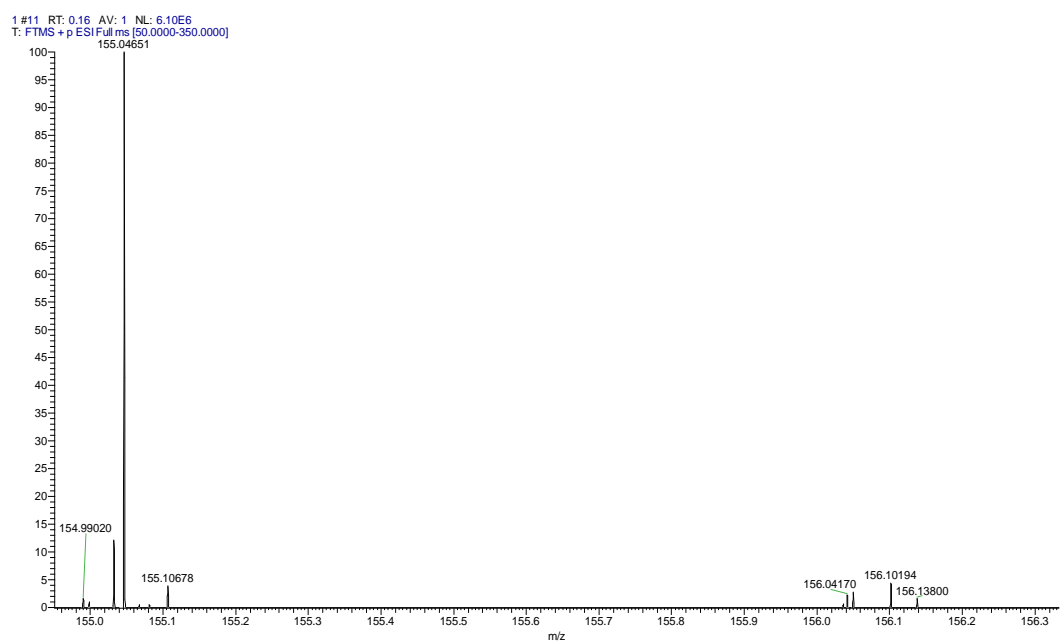

**Figure S5.** ESI-MS of 2-mercapto-1-phenylethan-1-ol (**1b**) at  $m/z$   $[M^+ + 1]$ .



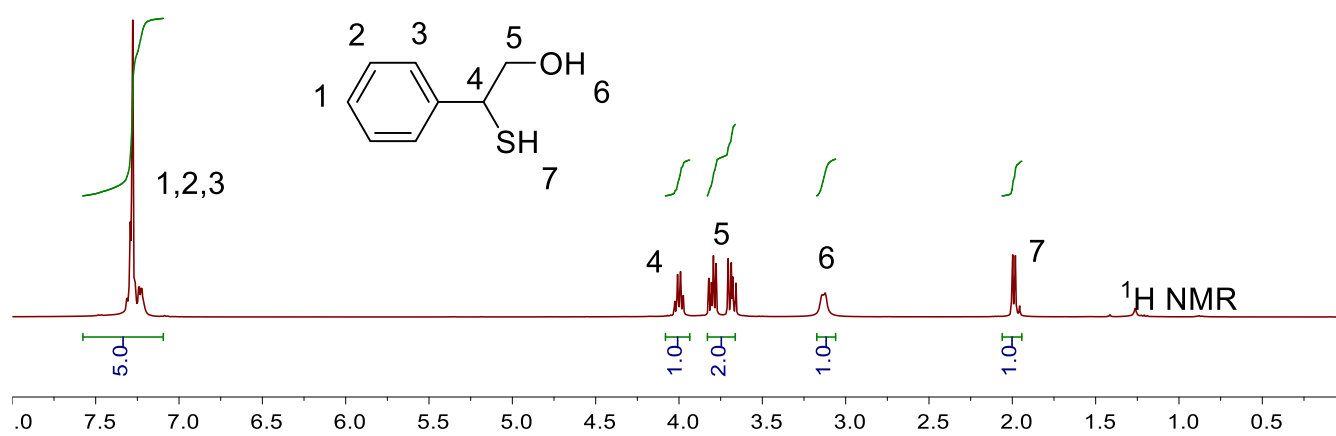

**Figure S6.**  $^1\text{H}$  NMR of 2-mercapto-2-phenylethan-1-ol (1c).

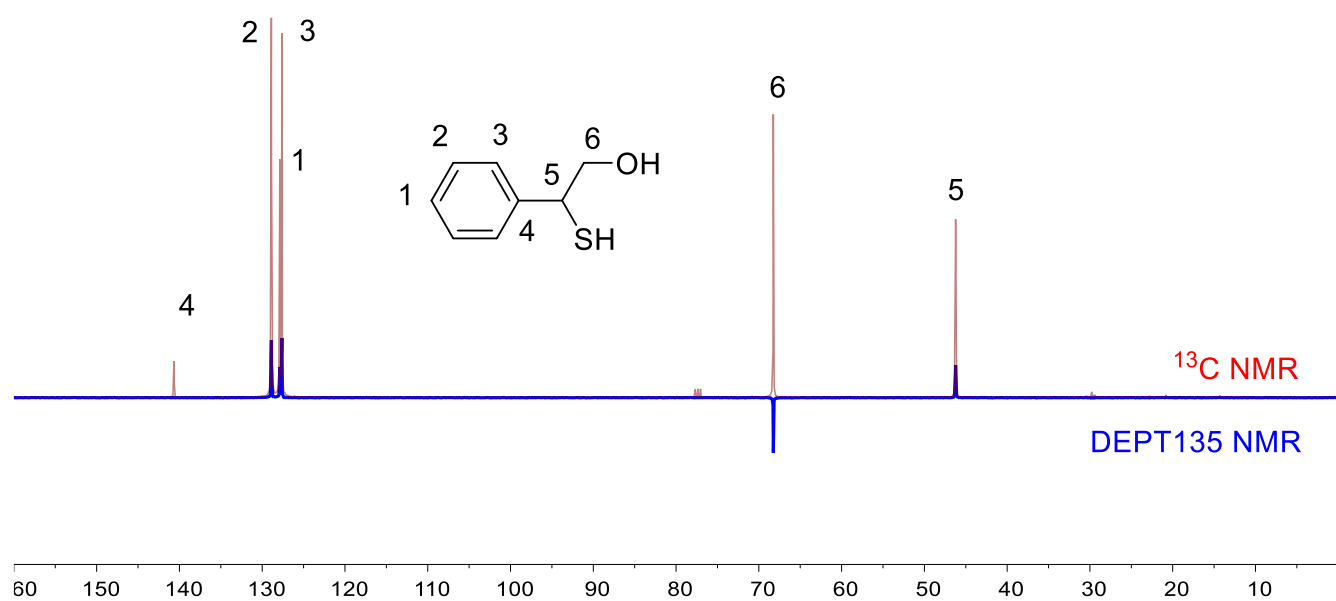

**Figure S7.**  $^{13}\text{C}$  NMR of 2-mercapto-2-phenylethan-1-ol (1c).

2 #7-14 RT: 0.10-0.19 AV: 4 NL: 7.02E5  
T: FTMS + p ESI Full ms [50.0000-350.0000]

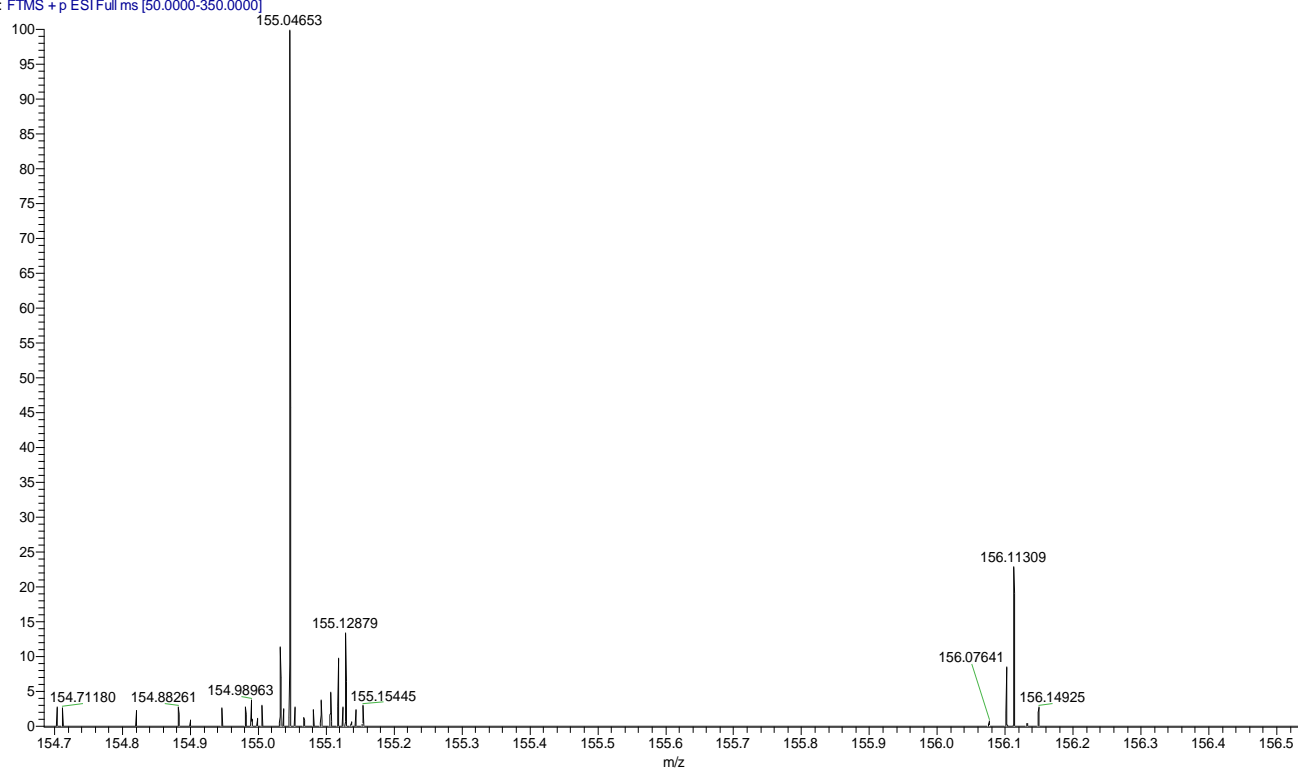

Figure S8. ESI-MS of 2-mercapto-2-phenylethan-1-ol (**1c**) at  $m/z$   $[M^+ + 1]$ .

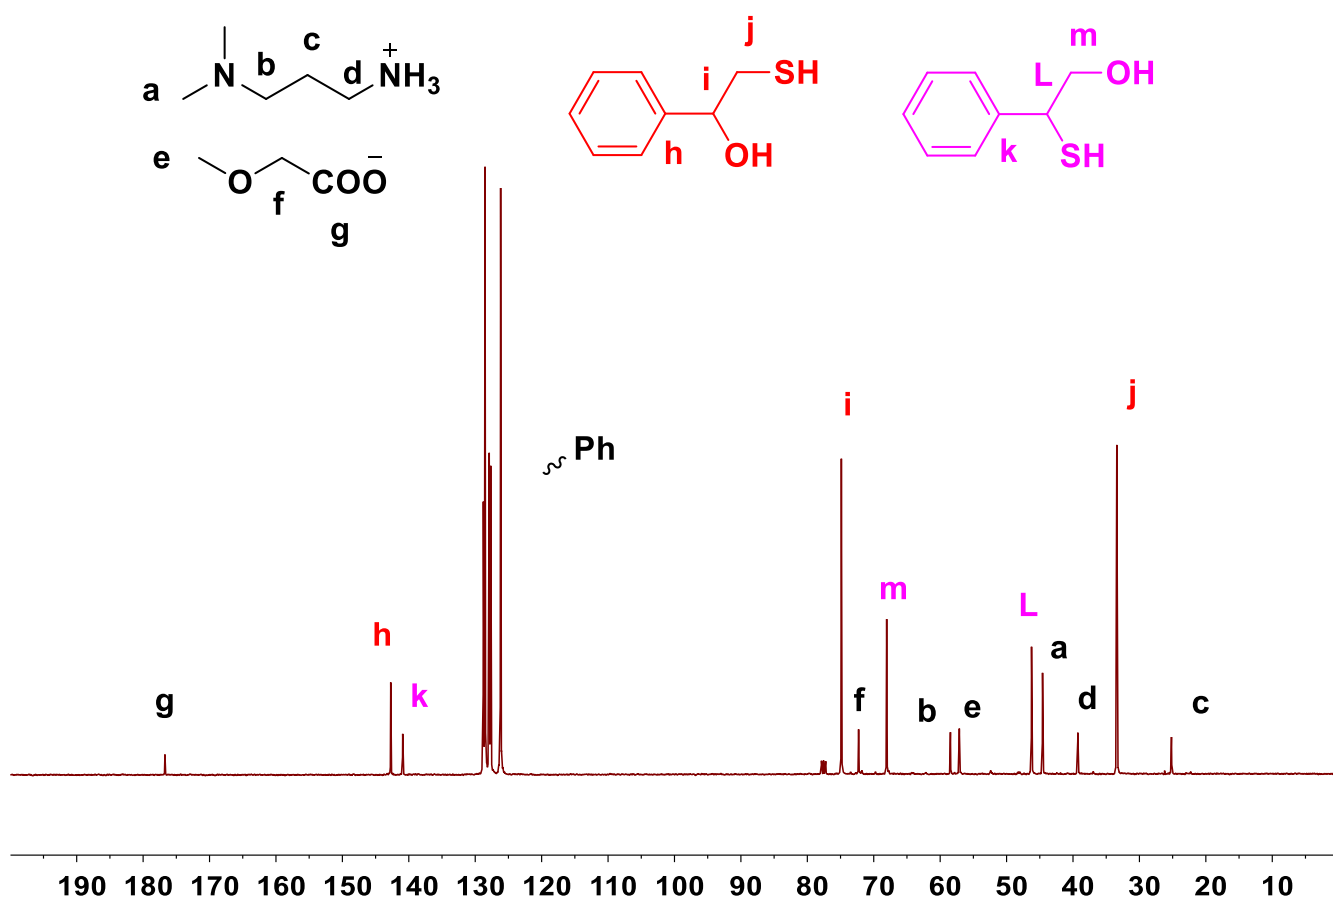

Figure S9.  $^{13}\text{C}$  NMR of styrene oxide (**1a**) with [DMAPAH][MeOAc] after  $\text{H}_2\text{S}$  reaction.

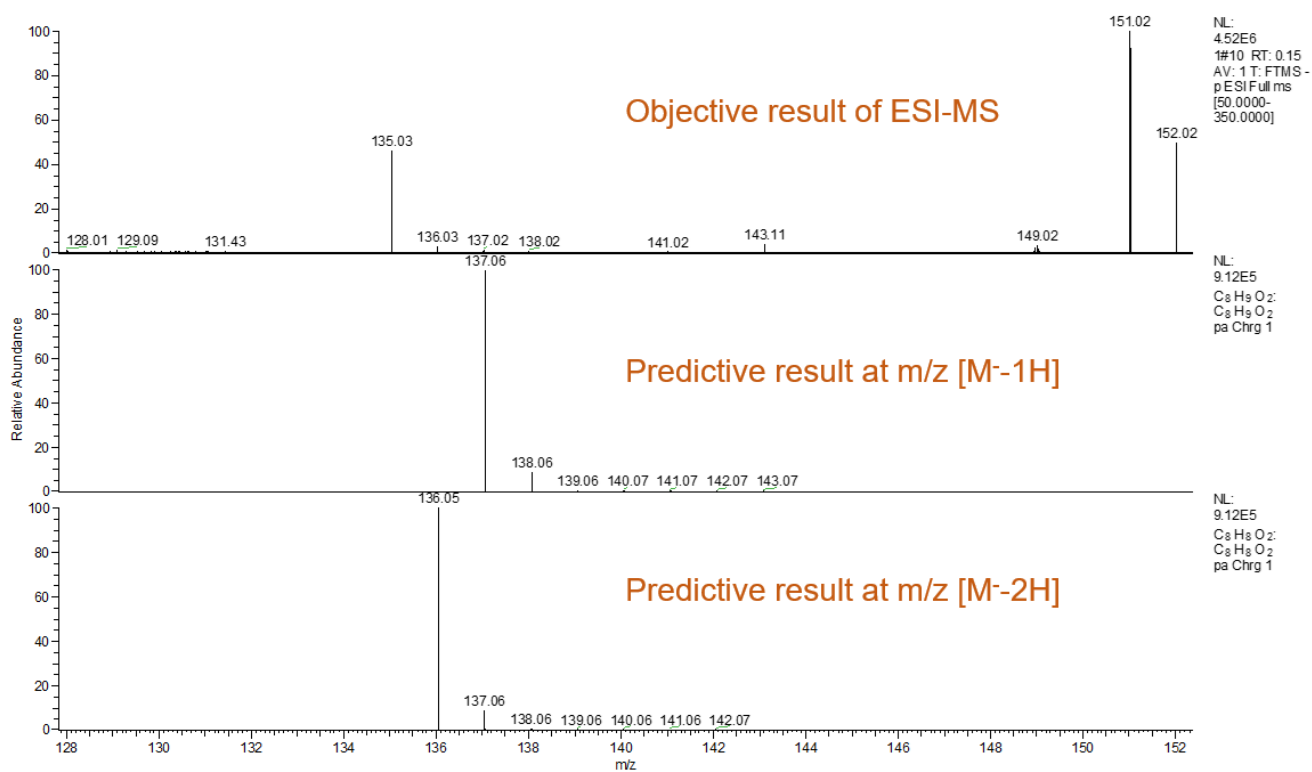

**Figure S10.** ESI-MS of styrene oxide (1a) with the catalyst [BDMAEEH][MeOAc] with 10 wt.% H<sub>2</sub>O after H<sub>2</sub>S reaction.

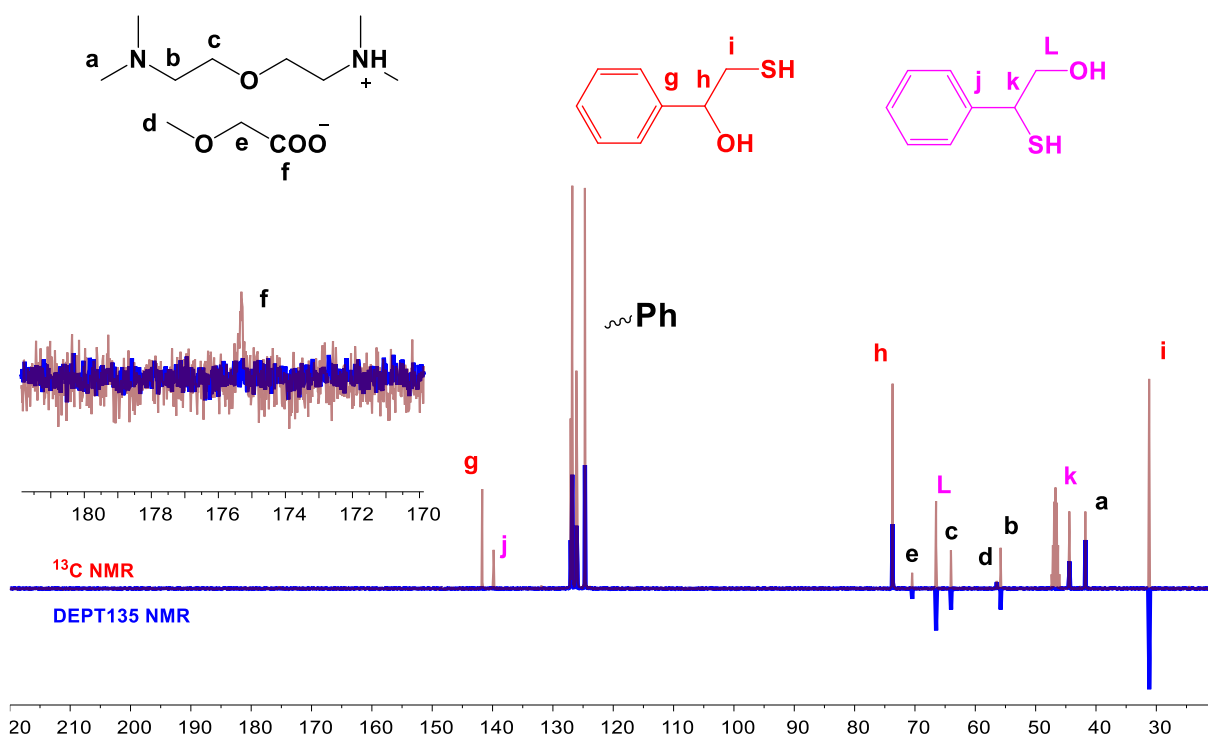

**Figure S11.**  $^{13}\text{C}$  NMR of styrene oxide (1a) with the catalyst [BDMAEEH][MeOAc] with 10 wt.%  $\text{H}_2\text{O}$  after  $\text{H}_2\text{S}$  reaction.

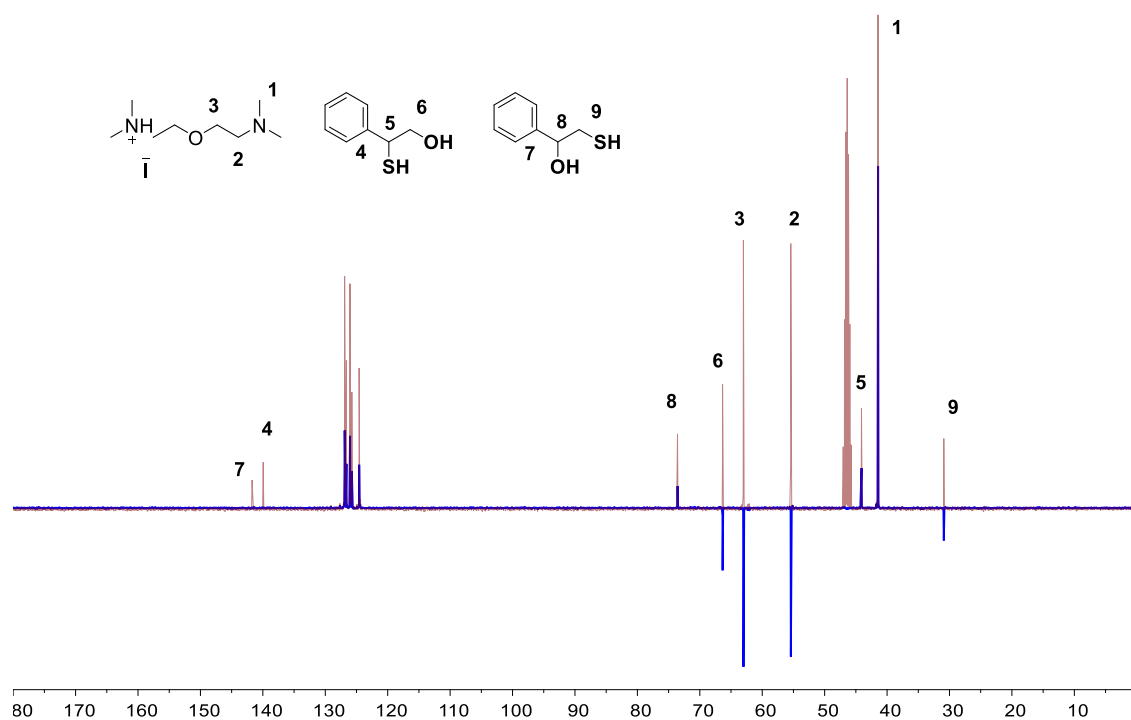

**Figure S12.**  $^{13}\text{C}$  NMR and DEPT135 of styrene oxide (1a) with [BDMAEEH][I] after  $\text{H}_2\text{S}$  reaction at  $30\text{ }^\circ\text{C}$ , 2h, and 50 mol% catalyst loading.

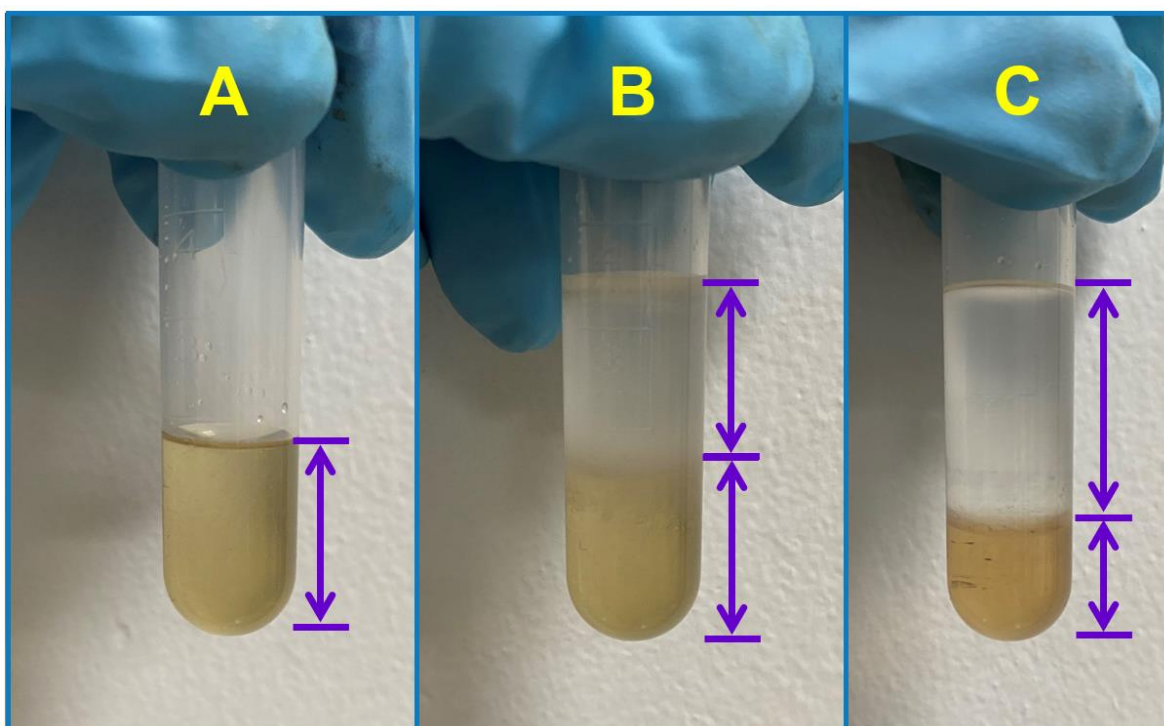

**Figure S13.** Water extraction for H<sub>2</sub>S/epoxy reaction system.

A: Untreated system; B: Same volume of water addition; C: Centrifugation after water extraction.

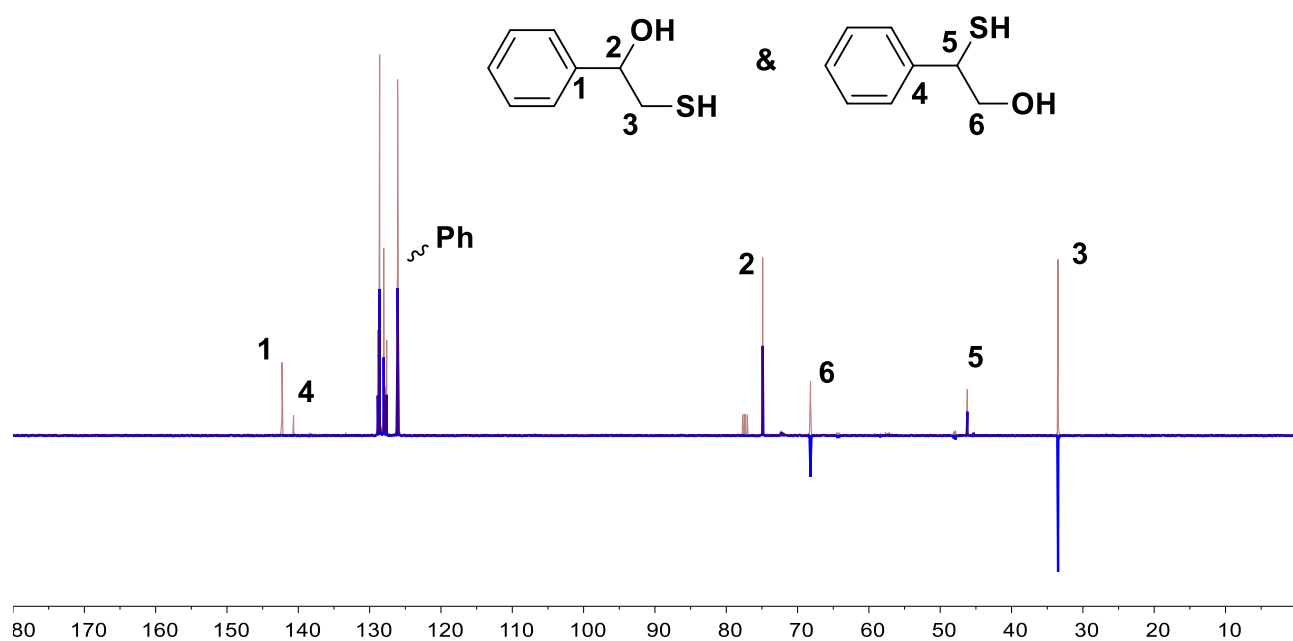

**Figure S14.** <sup>13</sup>C NMR and dept135 NMR of lower phase after water extraction.

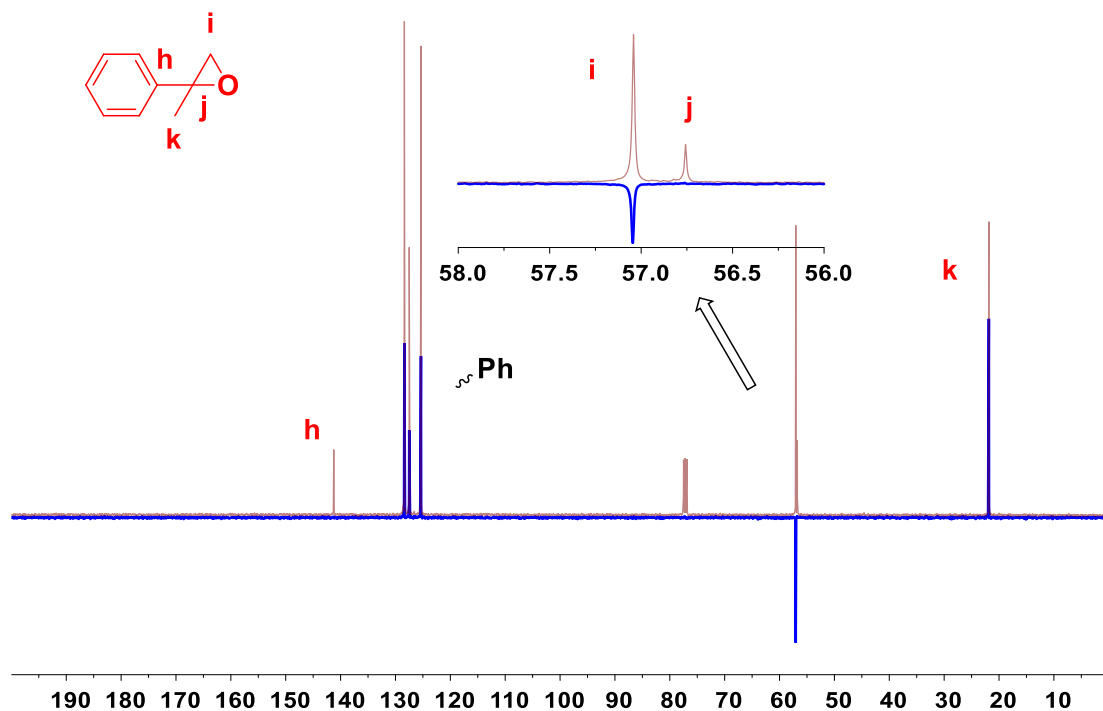

Figure S15.  $^{13}\text{C}$  NMR and dept135 NMR of 2-phenylpropylene oxide (2a).

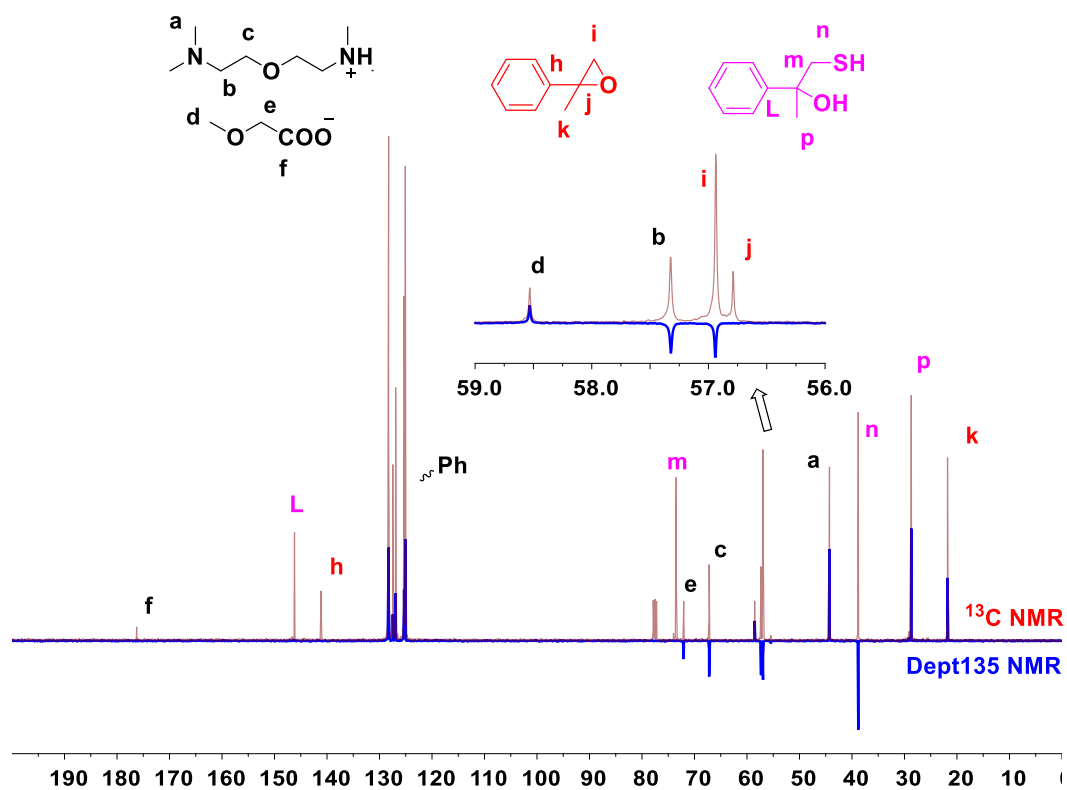

Figure S16. Dept135 and  $^{13}\text{C}$  NMR and of 2-phenylpropylene oxide (2a) in [BDMAEEH][MeOAc] after the reaction with  $\text{H}_2\text{S}$  at 30 °C for 2.0 h.

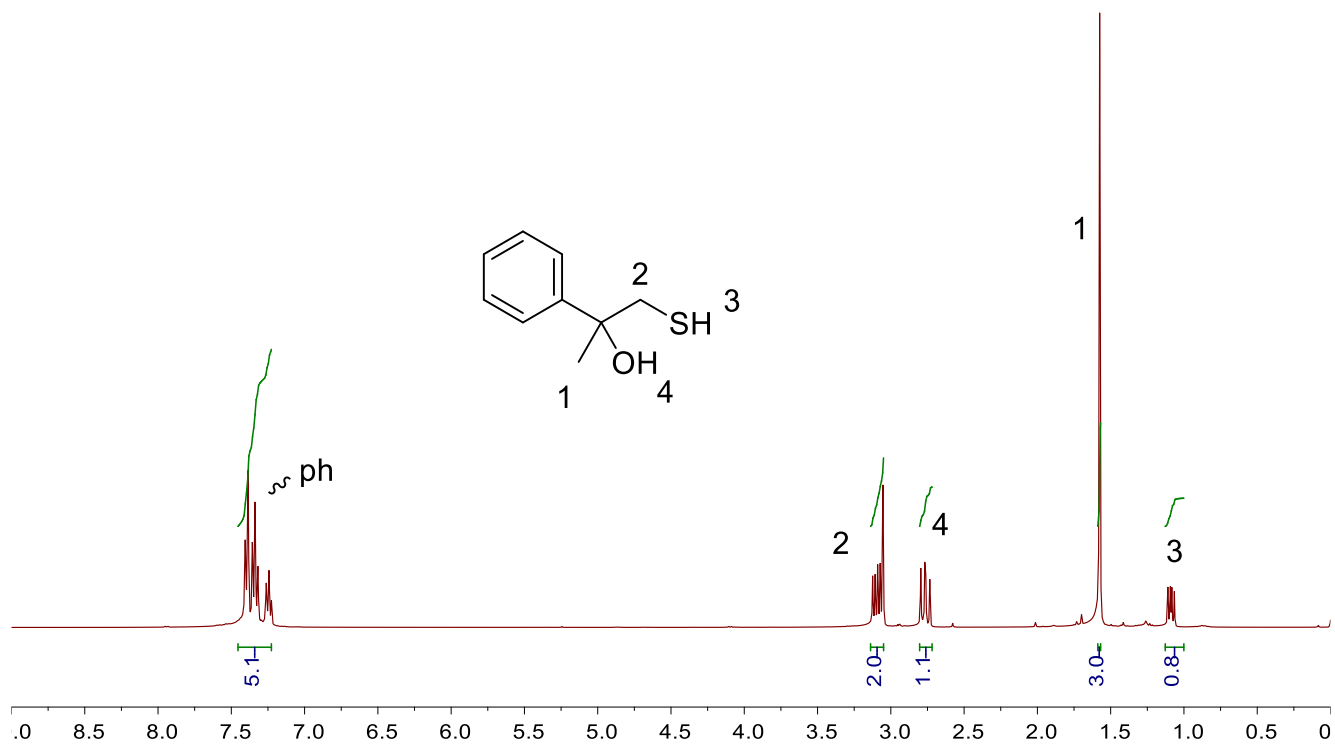

Figure S17.  $^1\text{H}$  NMR of 2b.

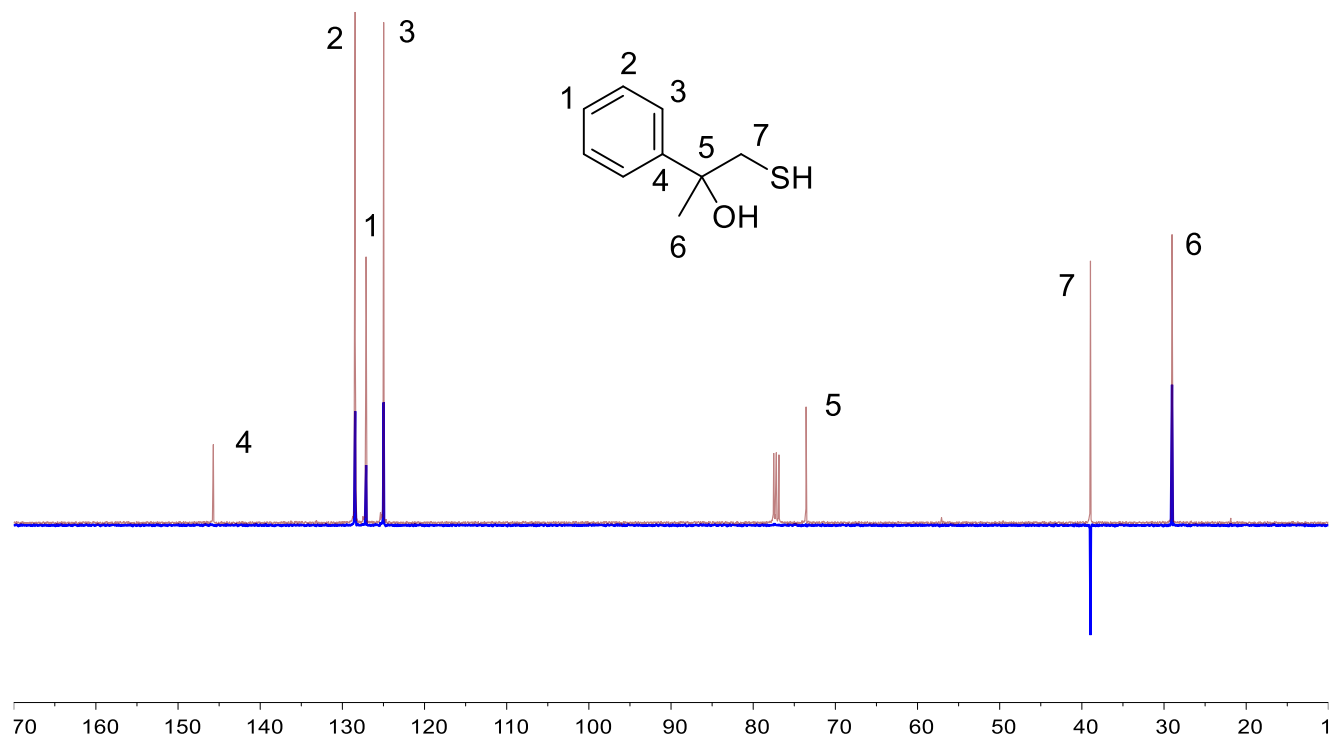

Figure S18.  $^{13}\text{C}$  NMR and dept135 NMR of 2b.

25 #18 RT: 0.25 AV: 1 NL: 6.69E7  
T: FTMS - p ESI Full ms [50.0000-500.0000]

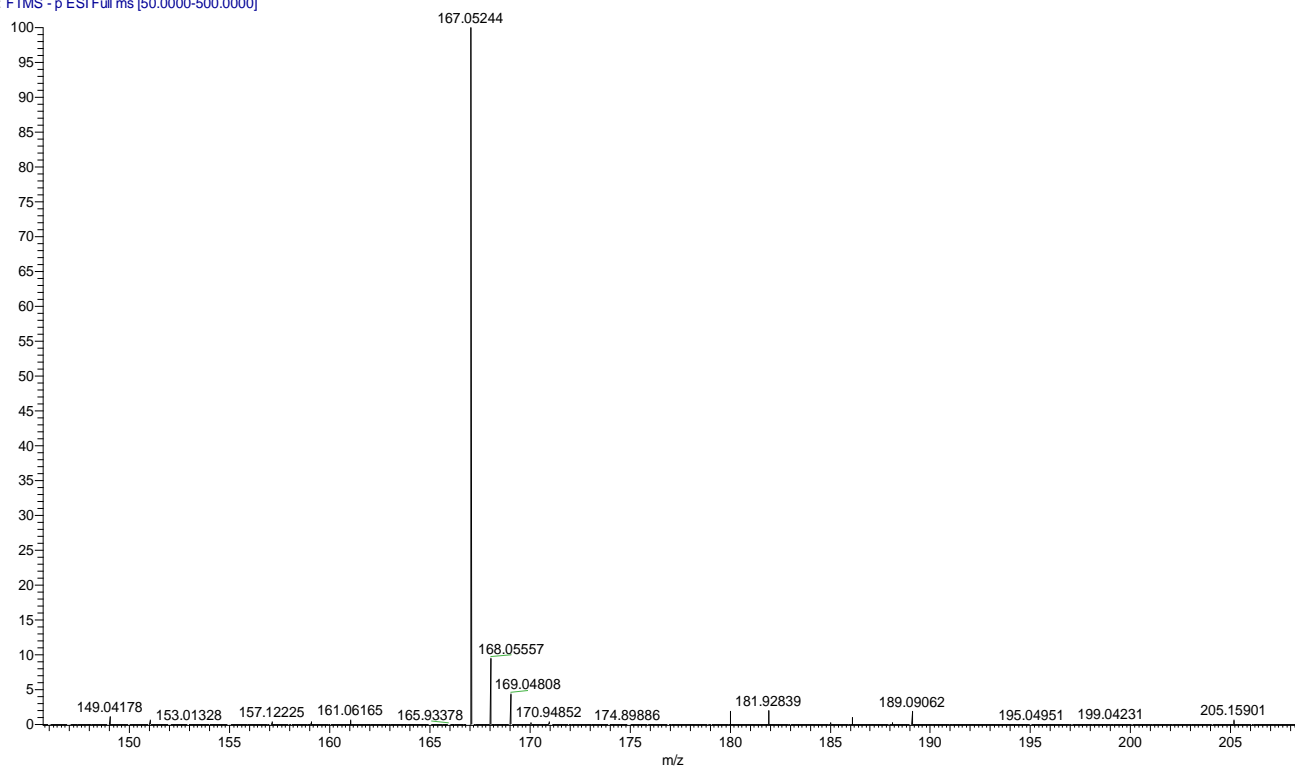

Figure S19. ESI-MS of (2b) at m/z [M<sup>-</sup>-1].

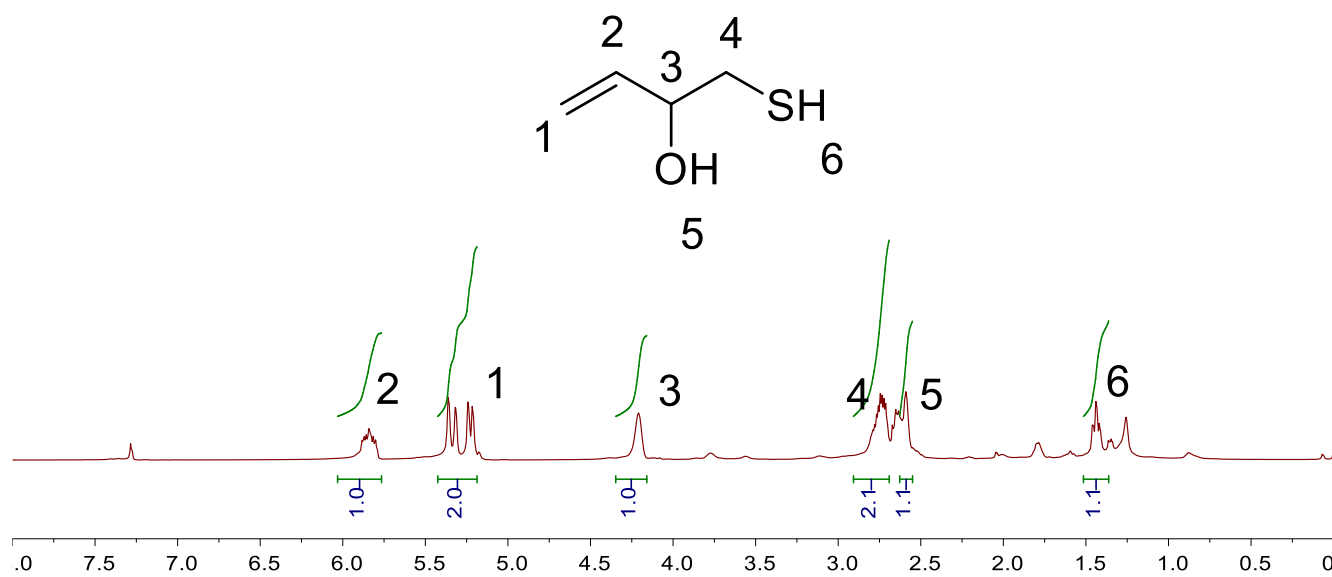

Figure S20. <sup>1</sup>H NMR of 3b.



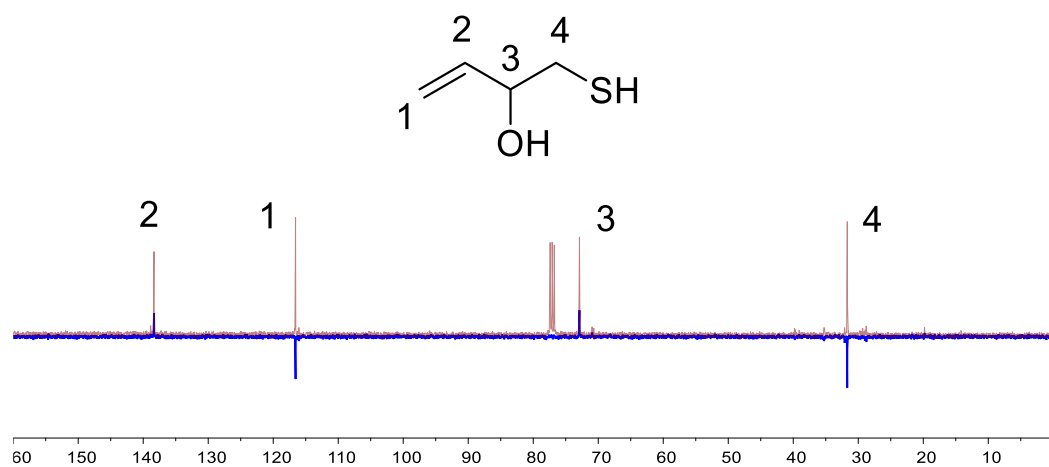

Figure S21. <sup>13</sup>C NMR of 3b.

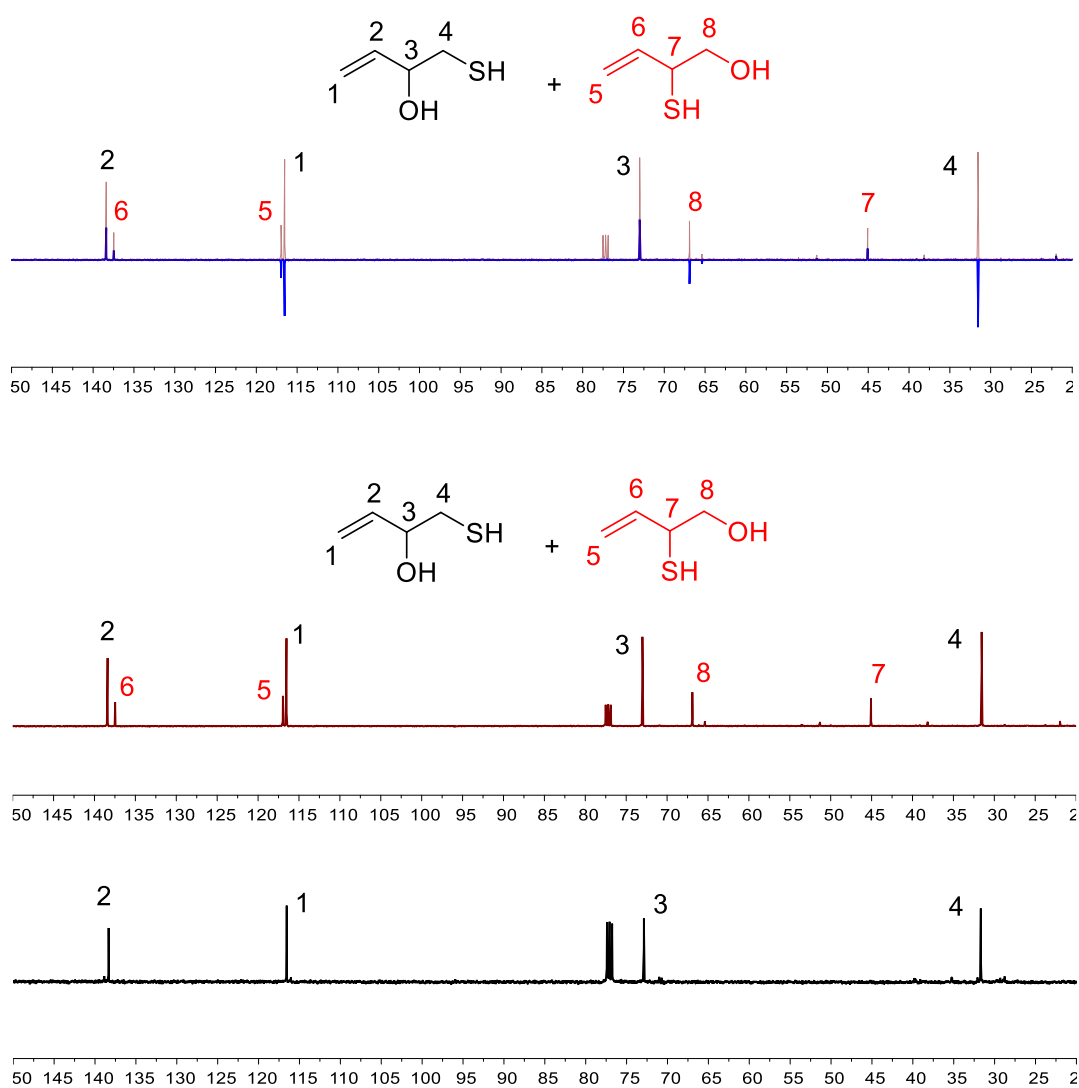

Figure S22. <sup>13</sup>C NMR of 3b+3c.

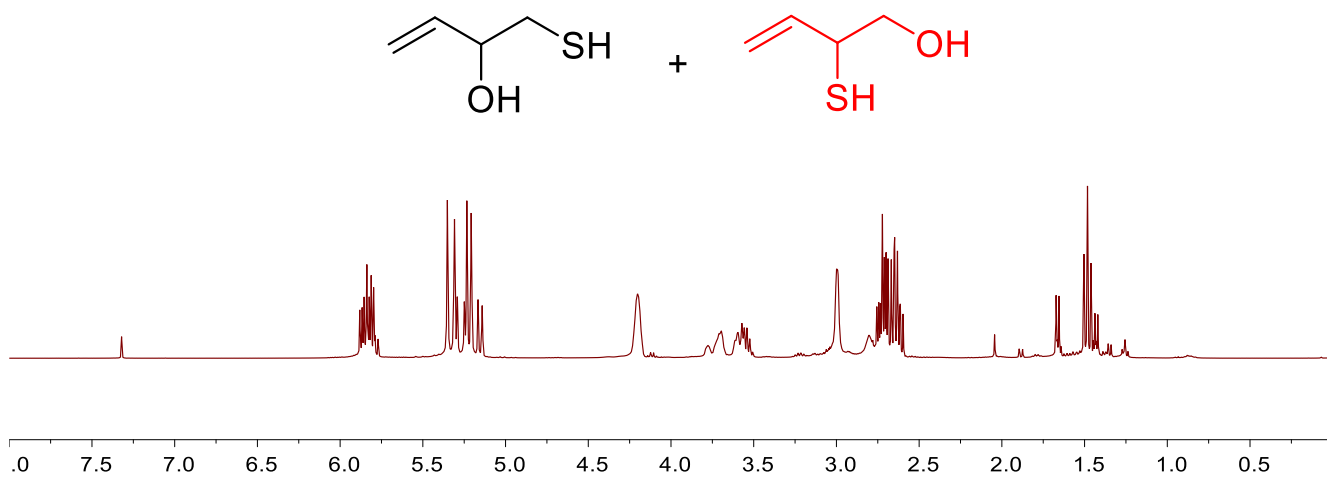

Figure S23. <sup>1</sup>H NMR of 3b+3c.

21 #10 RT: 0.14 AV: 1 NL: 1.07E7  
T: FTMS - p ESI Full ms [50.0000-500.0000]

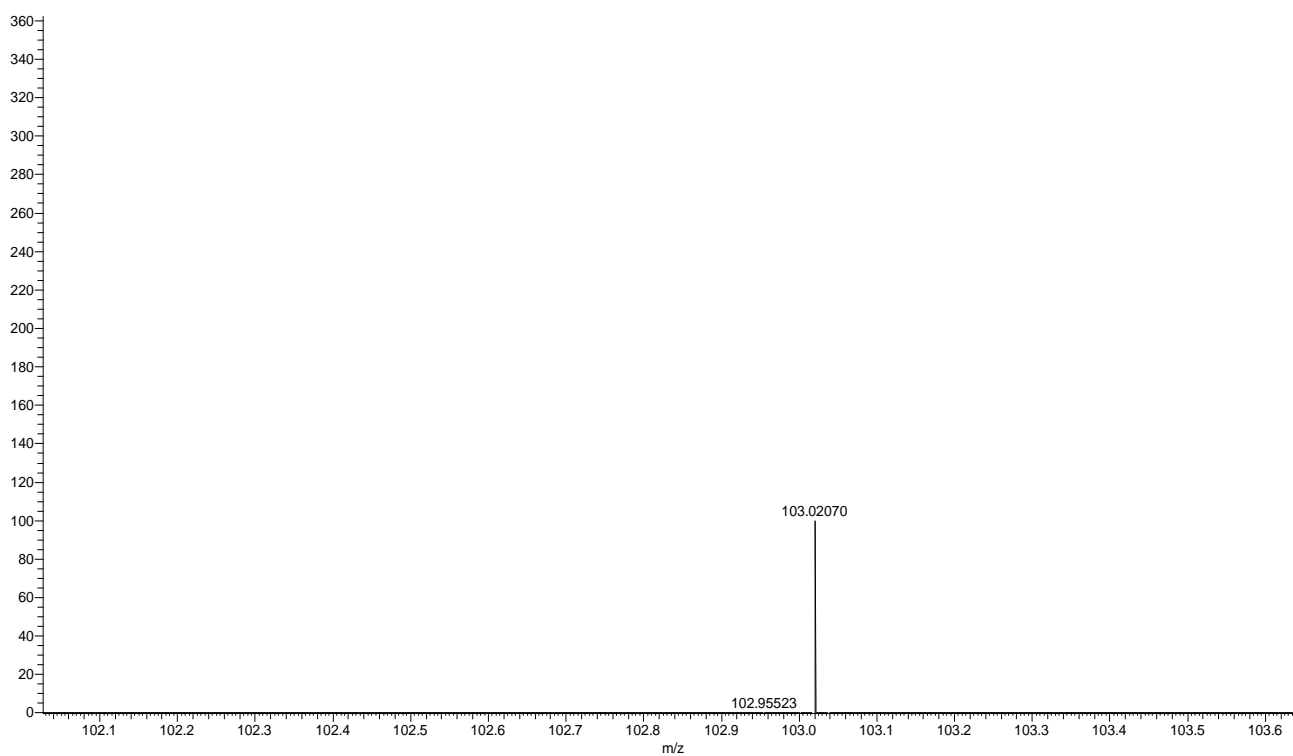

Figure S24. ESI-MS of 3b.

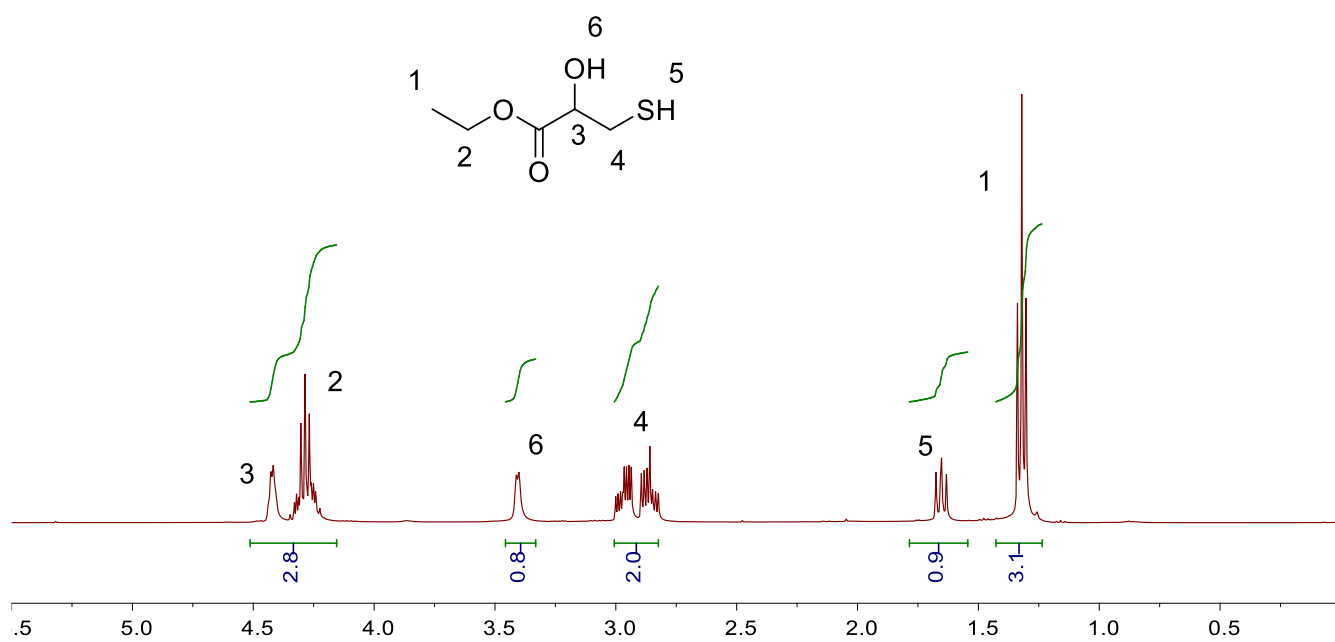

Figure S25. <sup>1</sup>H NMR of 4b.

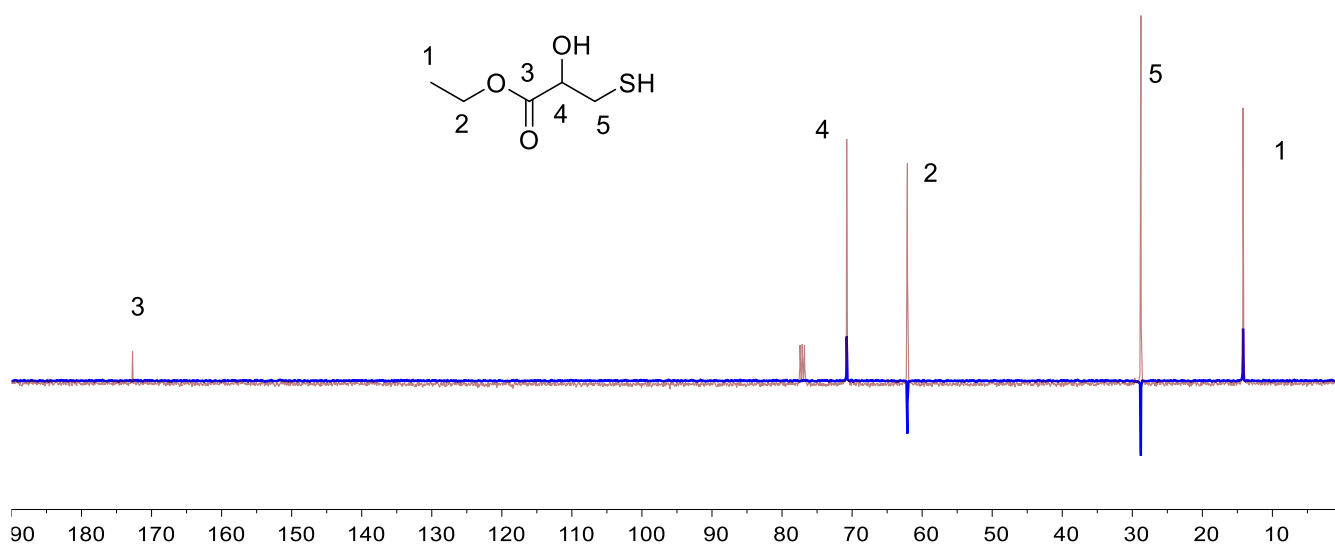

Figure S26. <sup>13</sup>C NMR of 4b.

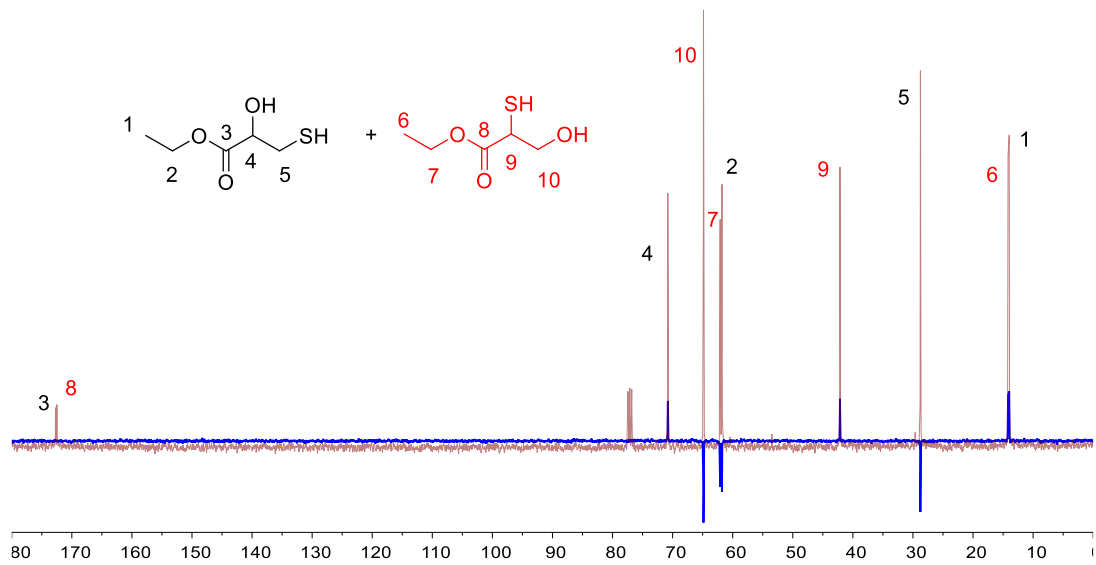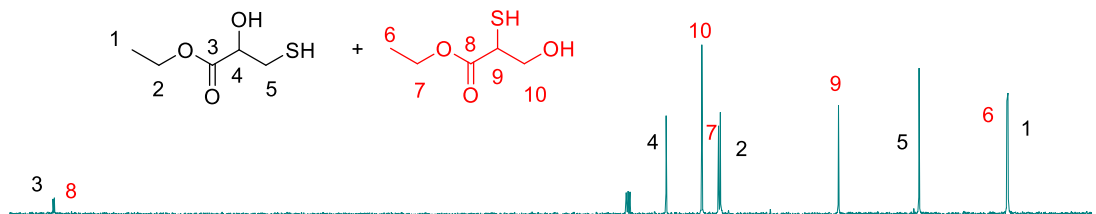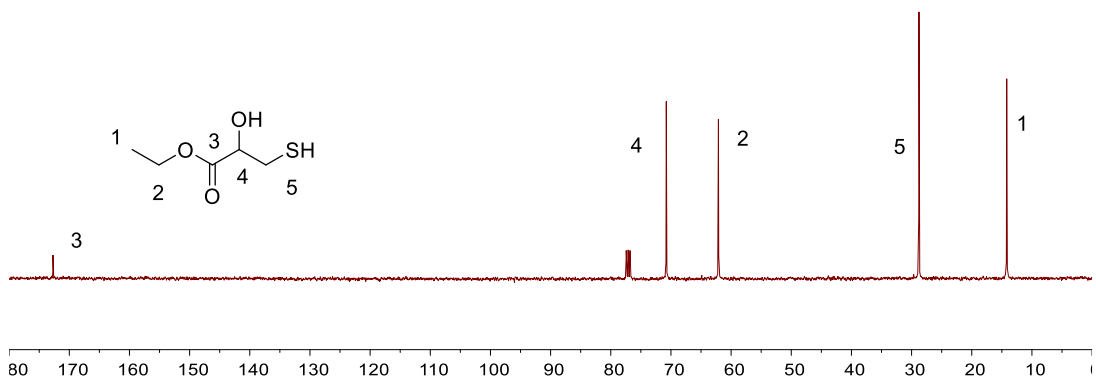

Figure S27.  $^{13}\text{C}$  NMR of 4b+4c.

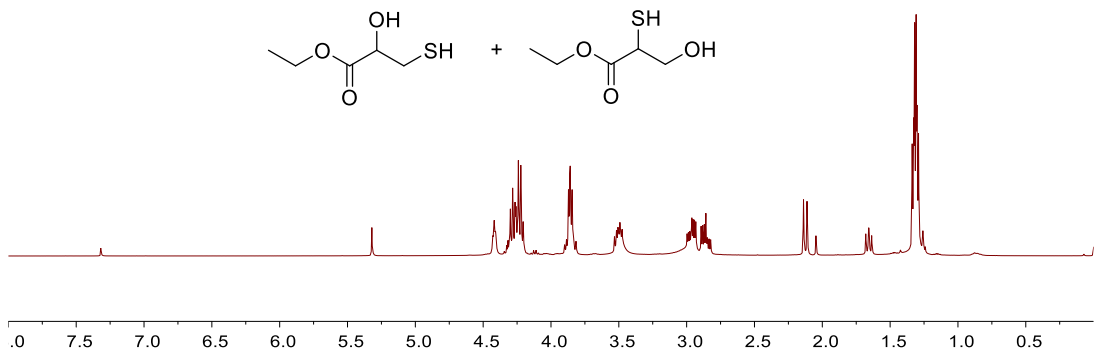

Figure S28.  $^1\text{H}$  NMR of 4b+4c.

20\_20201222154540 #13 RT: 0.18 AV: 1 NL: 2.33E8  
T: FTMS + p ESI Full ms [50.0000-500.0000]

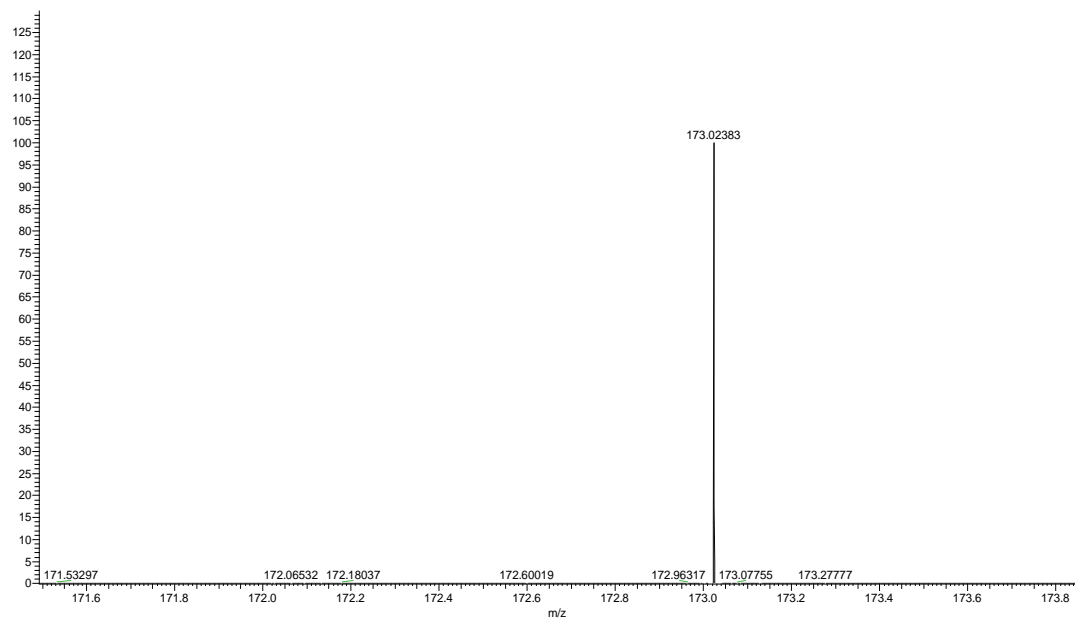

Figure S29. ESI-MS of 4b.

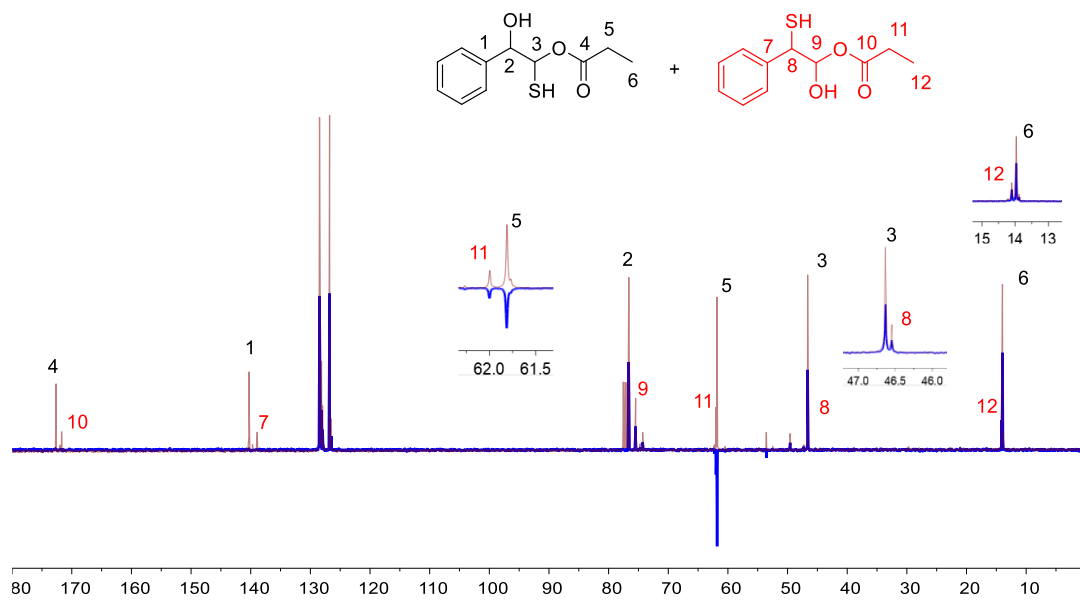

Figure S30. <sup>13</sup>C NMR of 5b+5c.

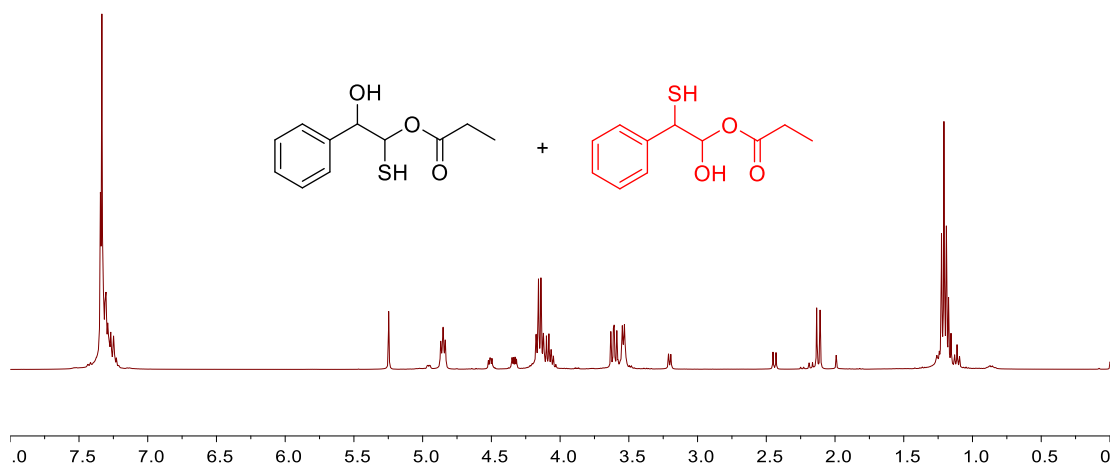

**Figure S31.** <sup>1</sup>H NMR of 5b+5c.

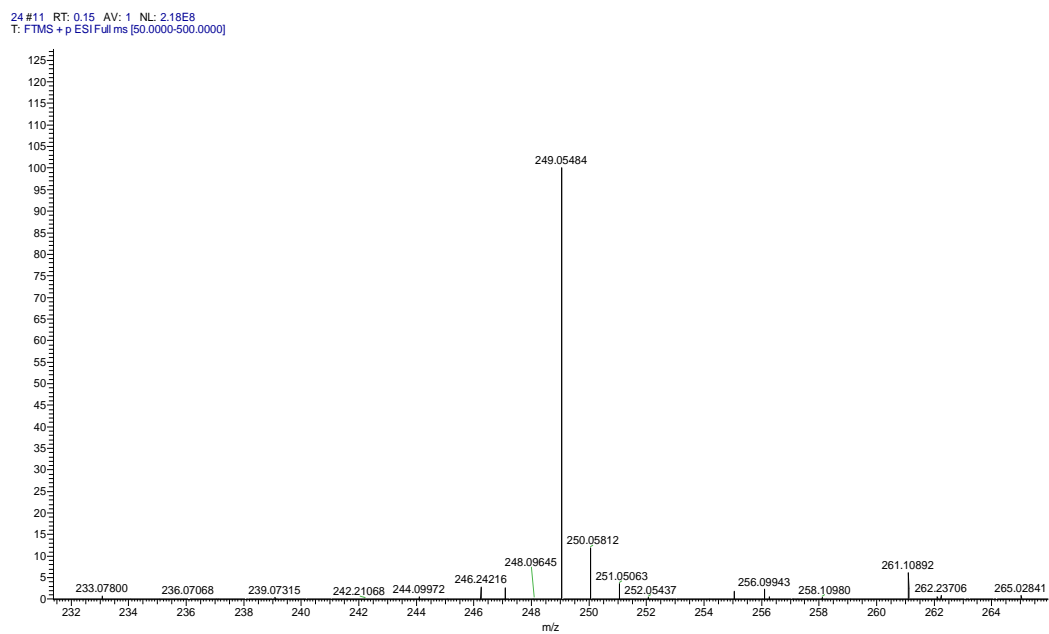

**Figure S32.** ESI-MS of 5b+5c.

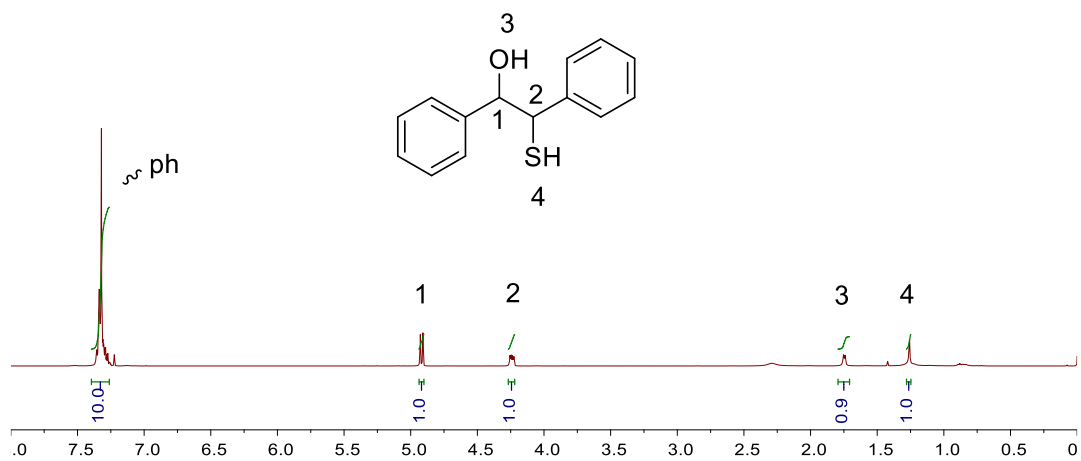

Figure S33. <sup>1</sup>H NMR of 6b.

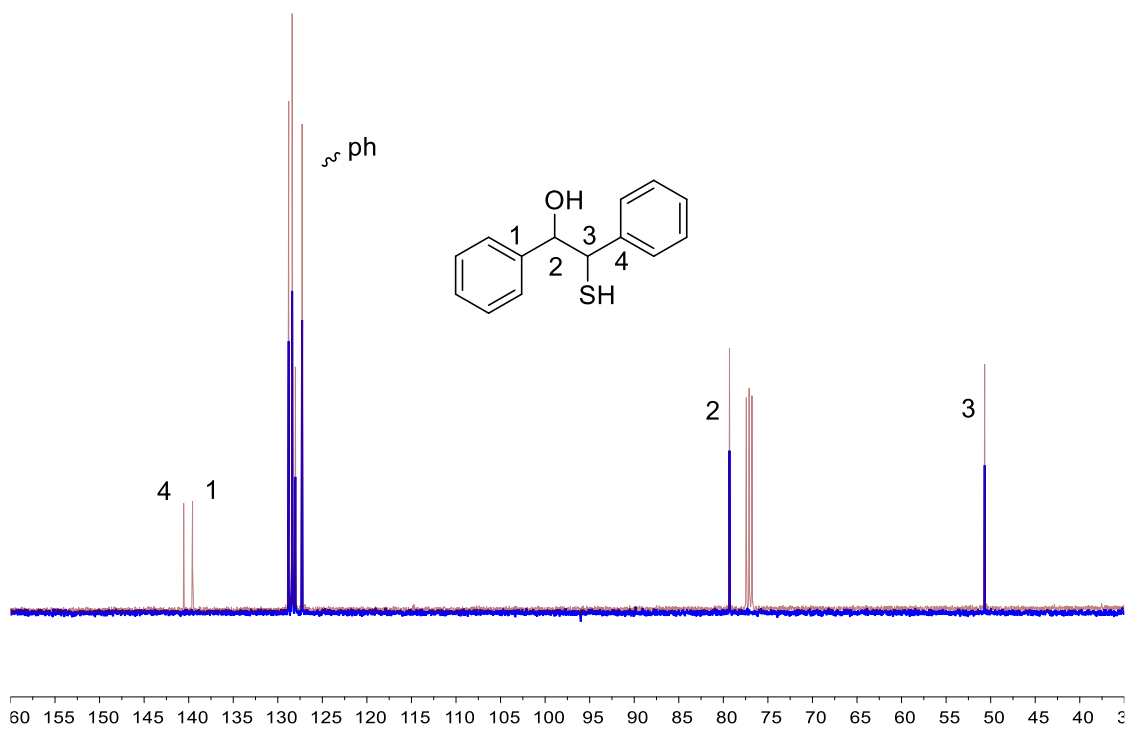

Figure S34. <sup>13</sup>C NMR of 6b.

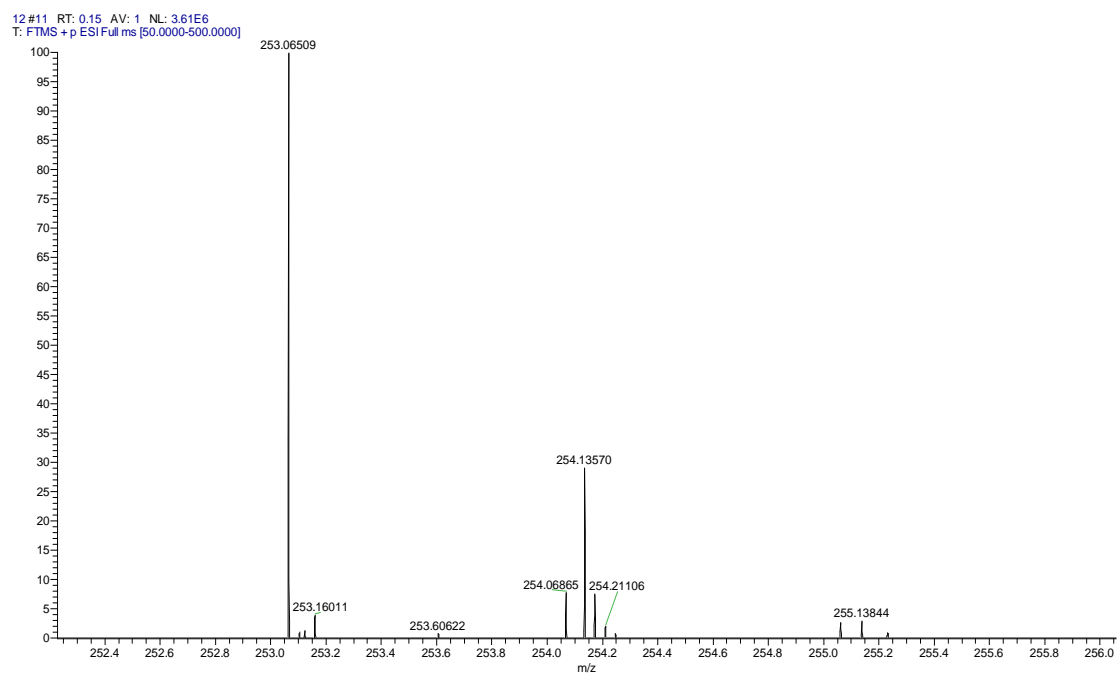

Figure S35. ESI-MS of 6b.

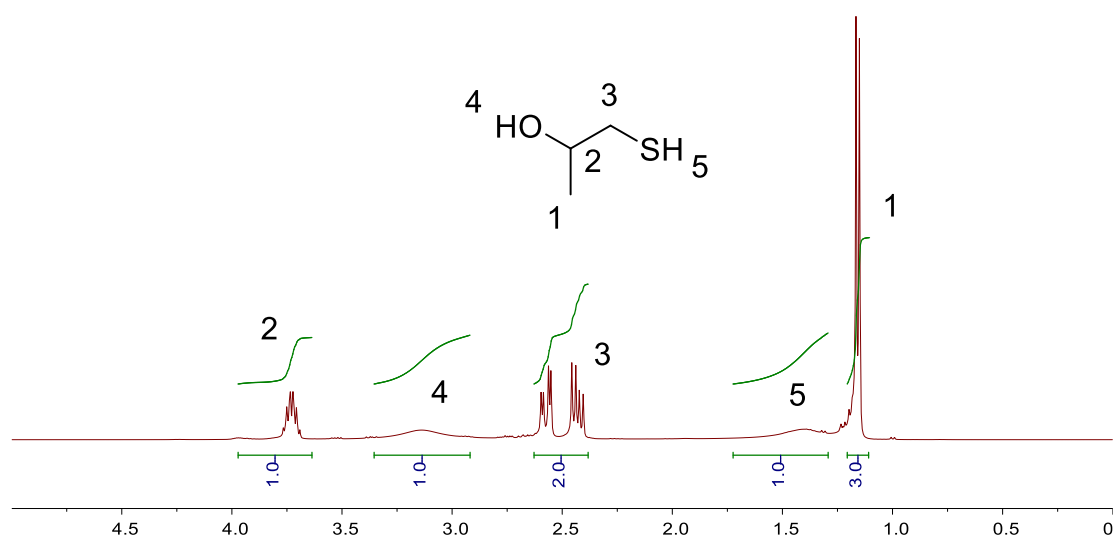

Figure S36. <sup>1</sup>H NMR of 7b.



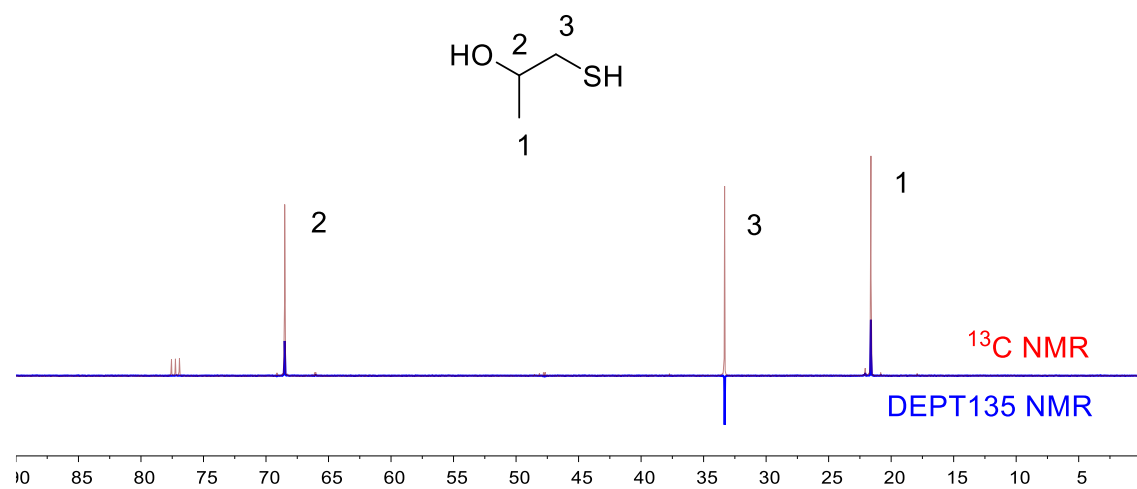

Figure S37.  $^{13}\text{C}$  NMR of 7b.

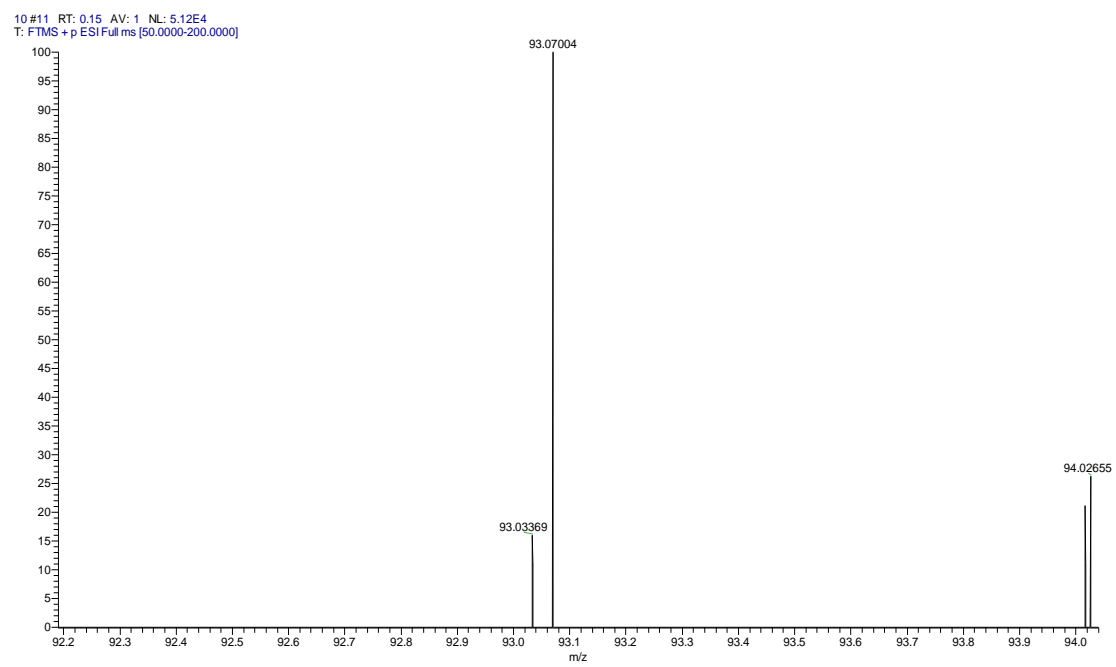

Figure S38. ESI-MS of 7b.

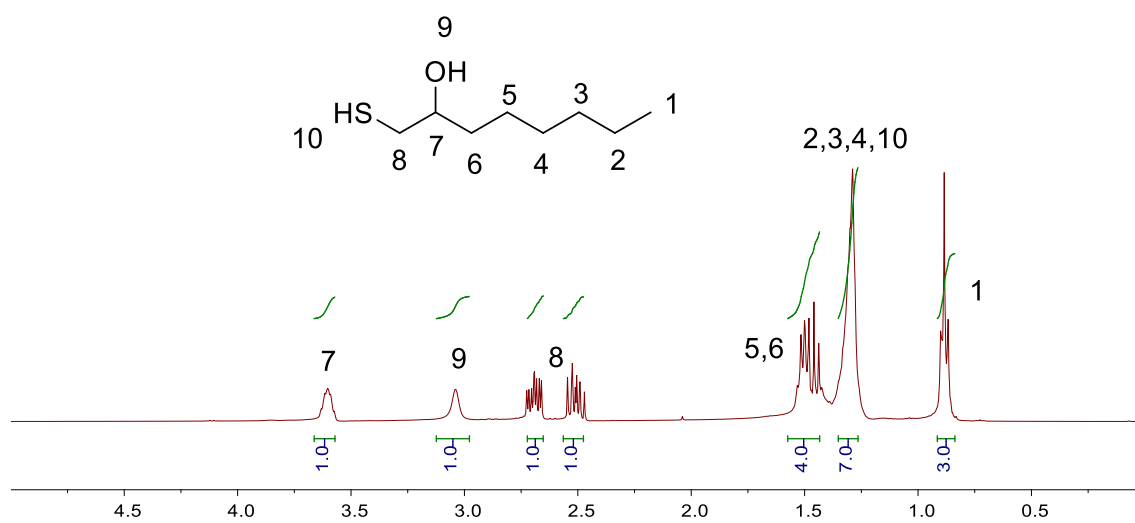

Figure S39.  $^1\text{H}$  NMR of 8b.

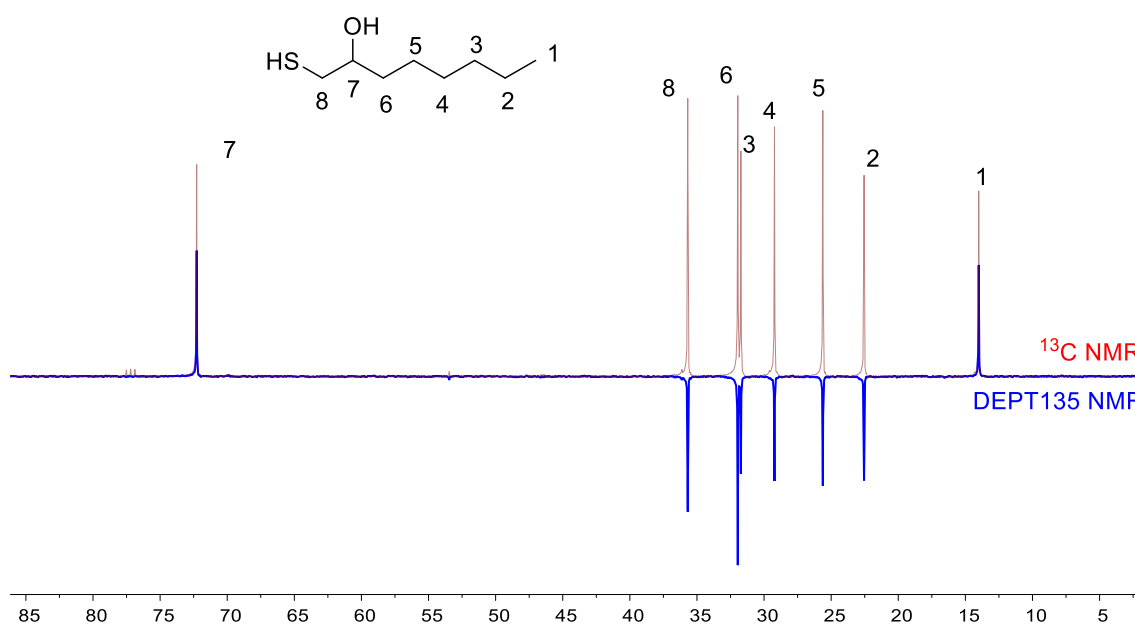

Figure S40.  $^{13}\text{C}$  NMR of 8b.

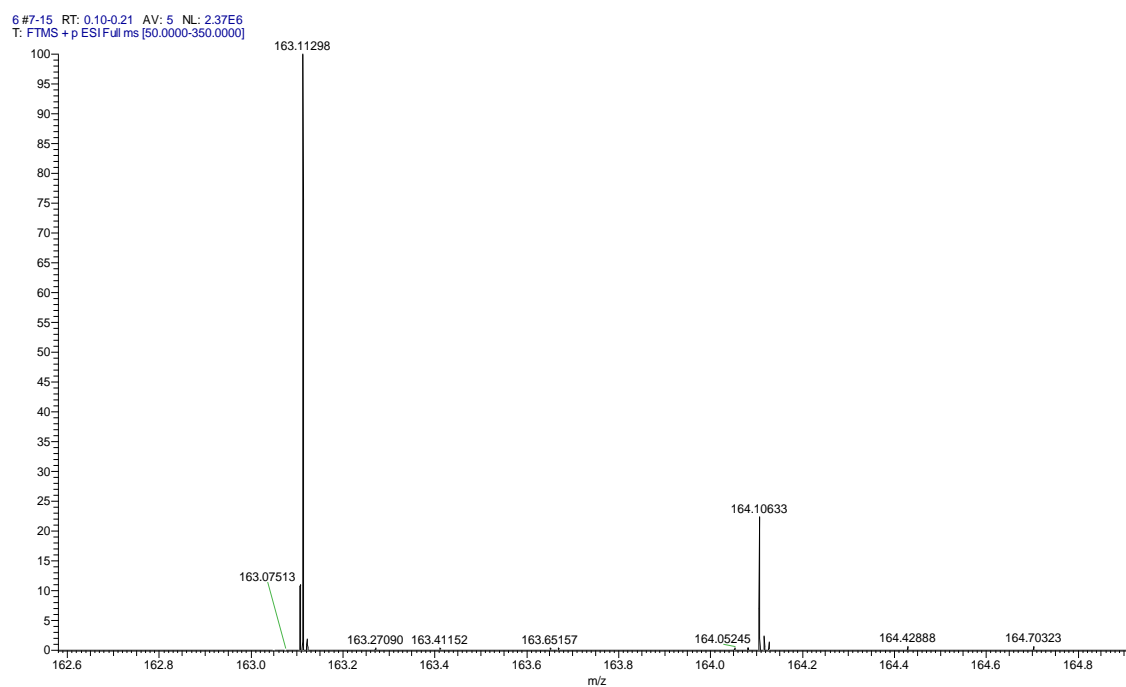

Figure S41.  $^{13}\text{C}$  NMR of 8b.

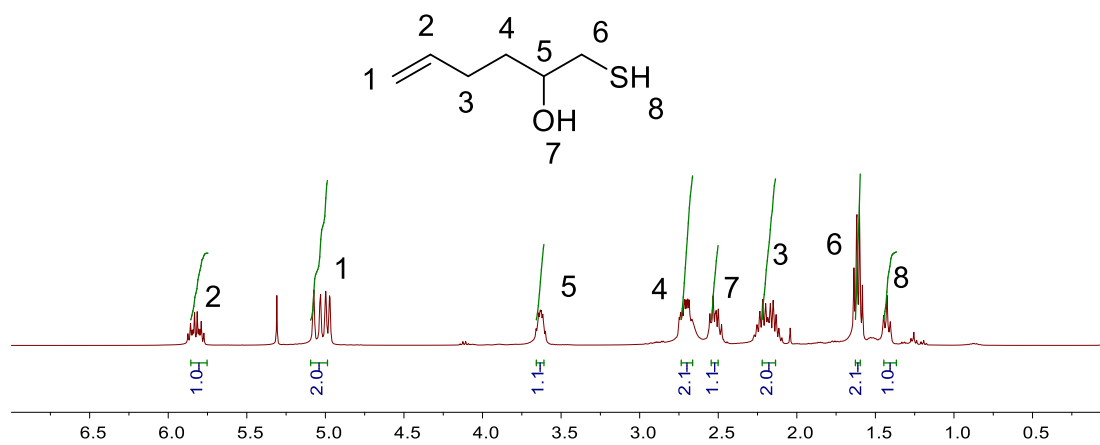

Figure S42.  $^1\text{H}$  NMR of 9b.

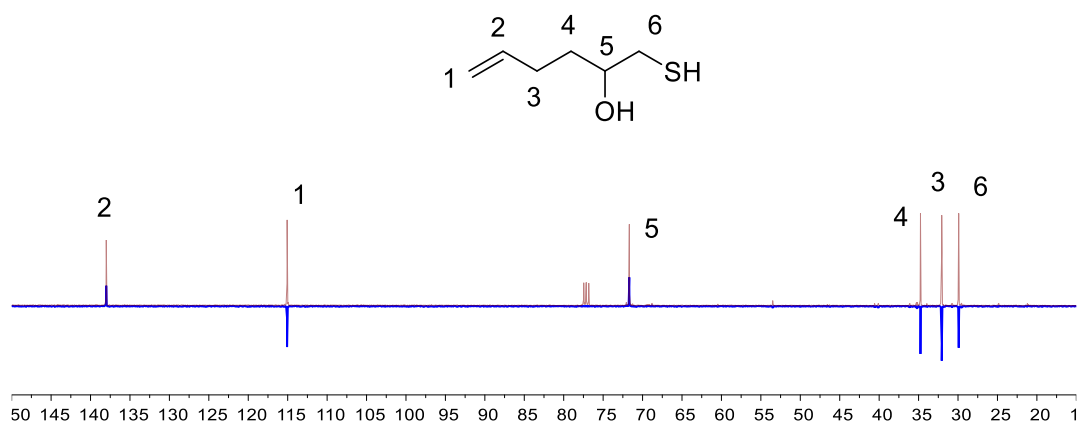

Figure S43. <sup>13</sup>C NMR of 9b.

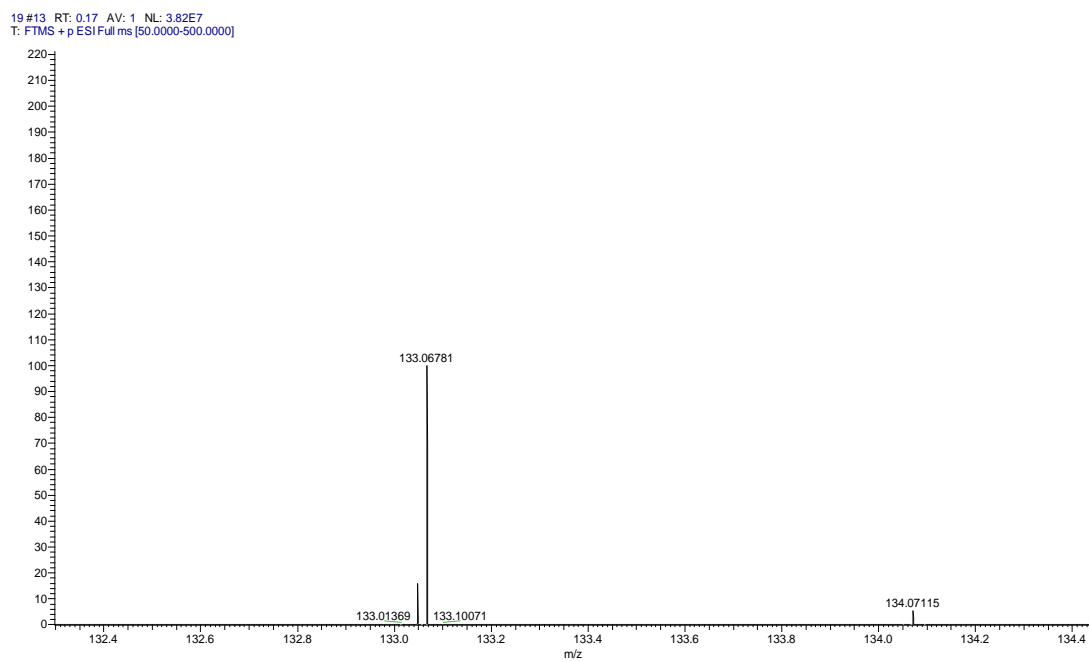

Figure S44. ESI-MS of 9b.

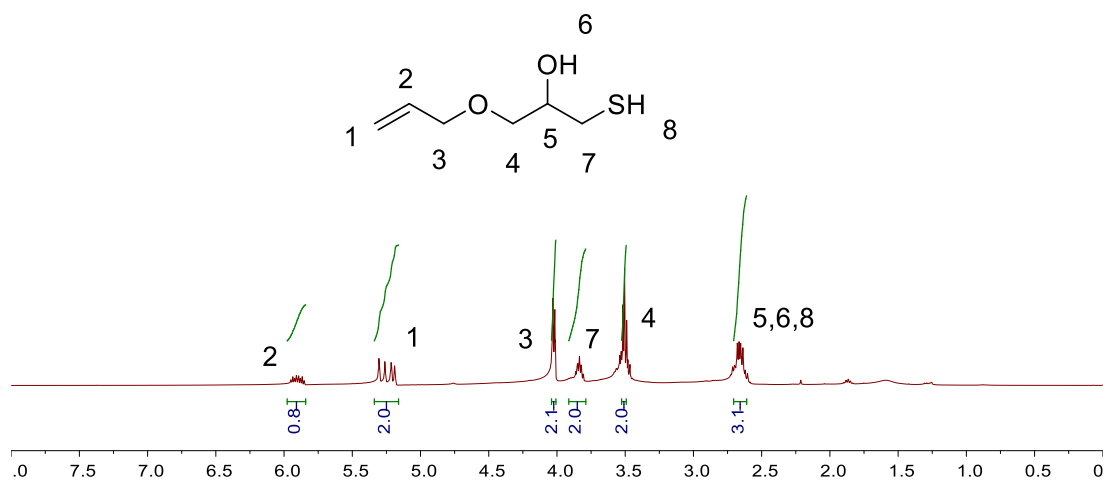

Figure S45.  $^1\text{H}$  NMR of 10b.

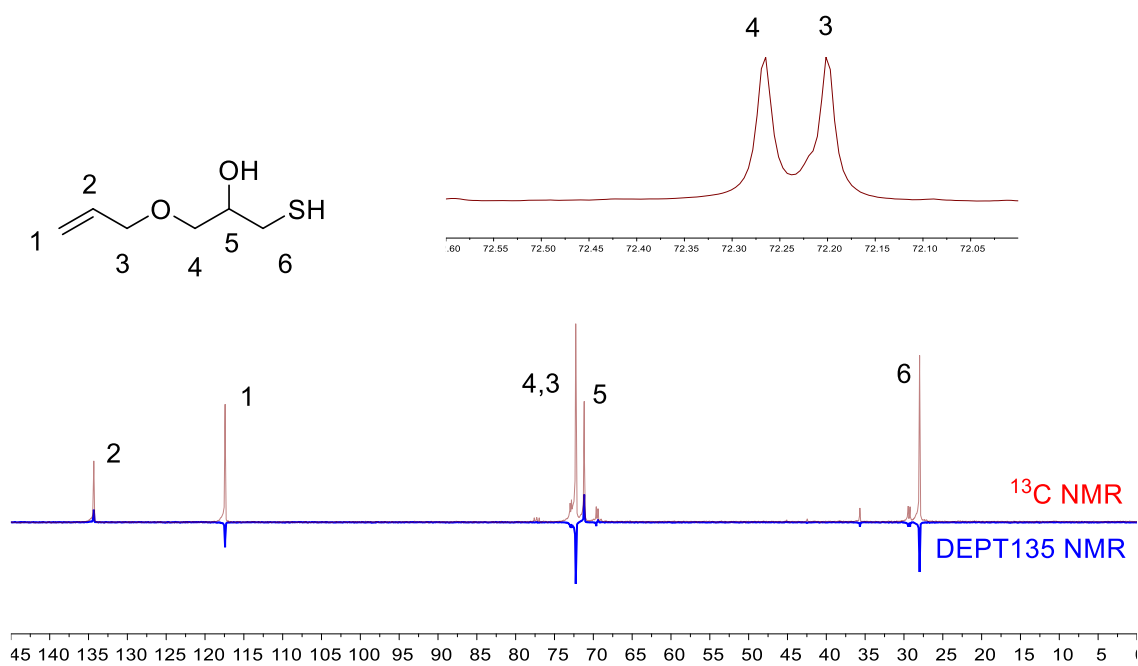

Figure S46.  $^{13}\text{C}$  NMR of 10b.

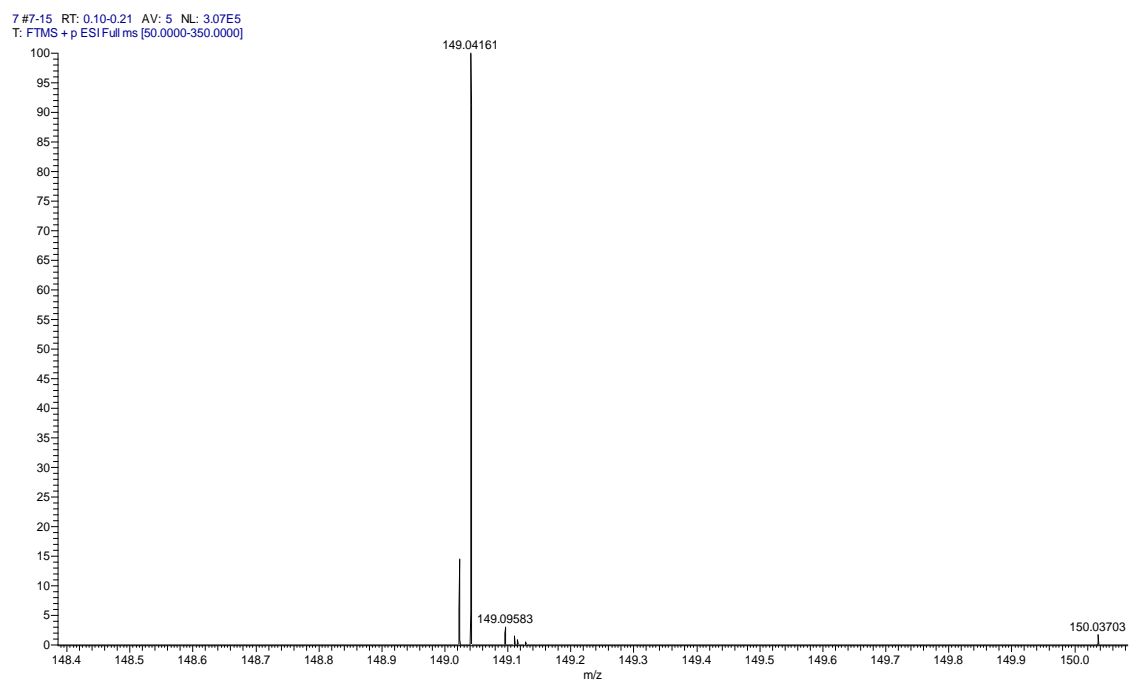

Figure S47. ESI-MS of 10b.

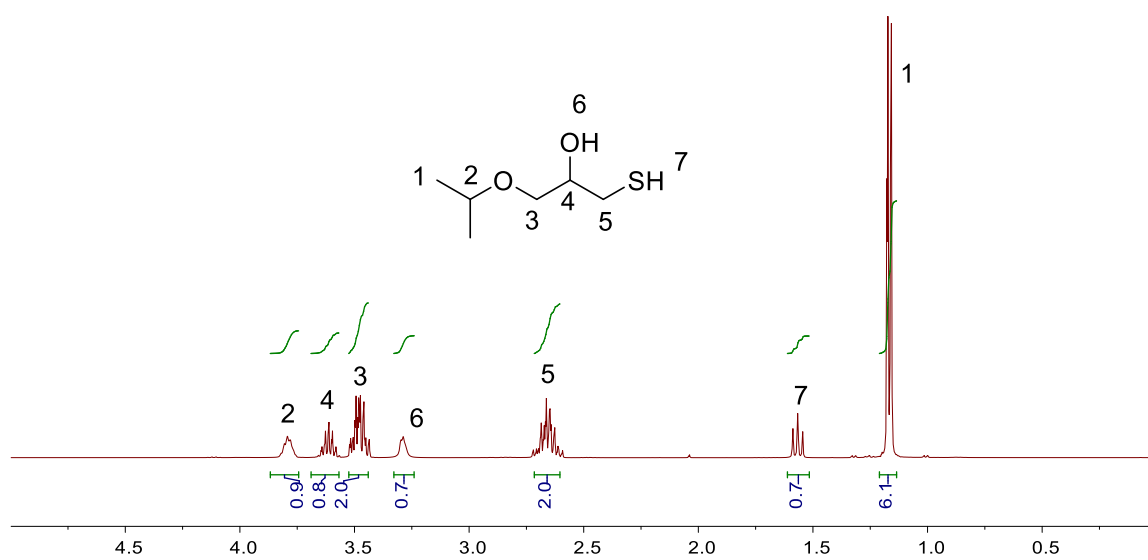

Figure S48.  $^1\text{H}$  NMR of 11b.

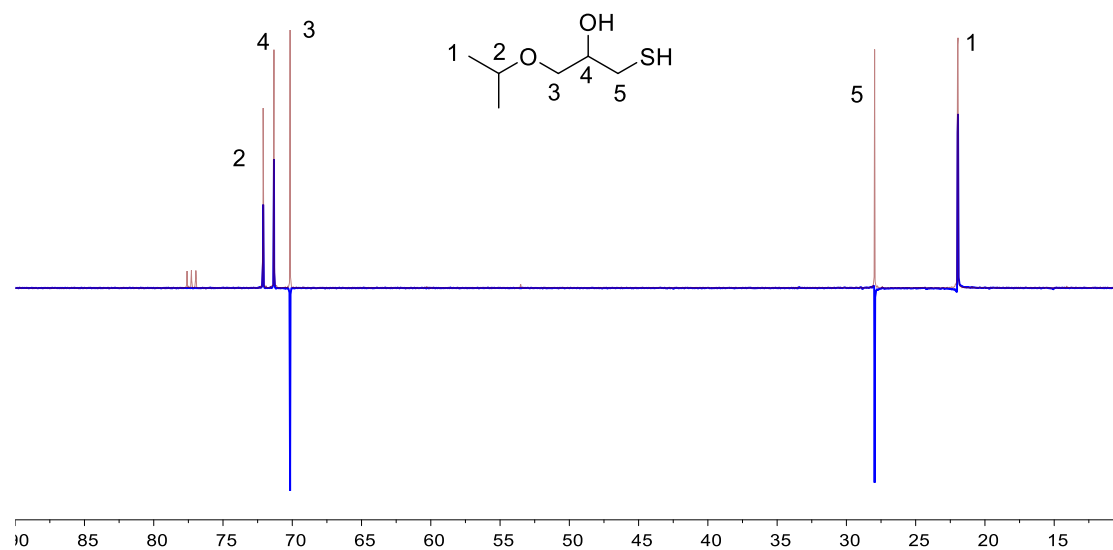

Figure S49. <sup>13</sup>C NMR of 11b.

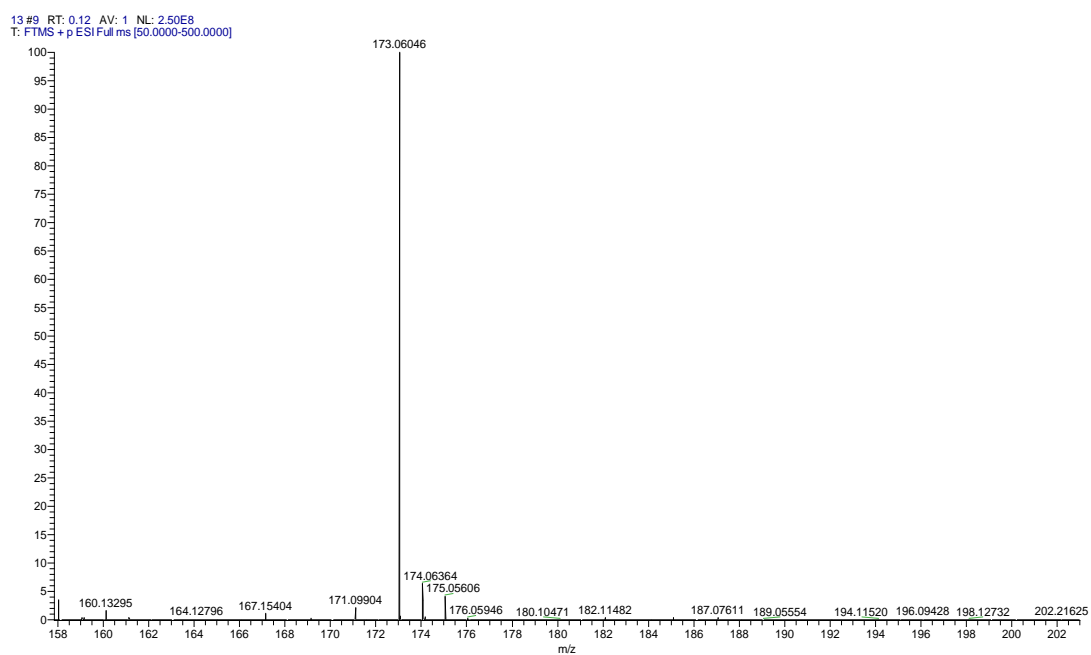

Figure S50. ESI-MS of 11b.

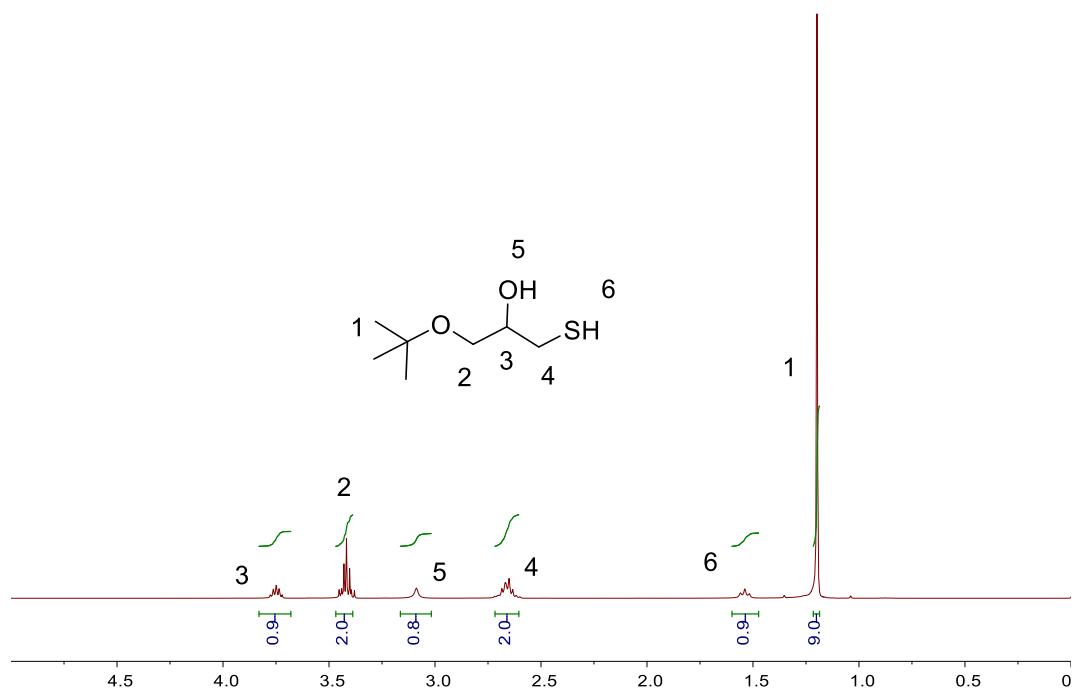

Figure S51.  $^1\text{H}$  NMR of 12b.

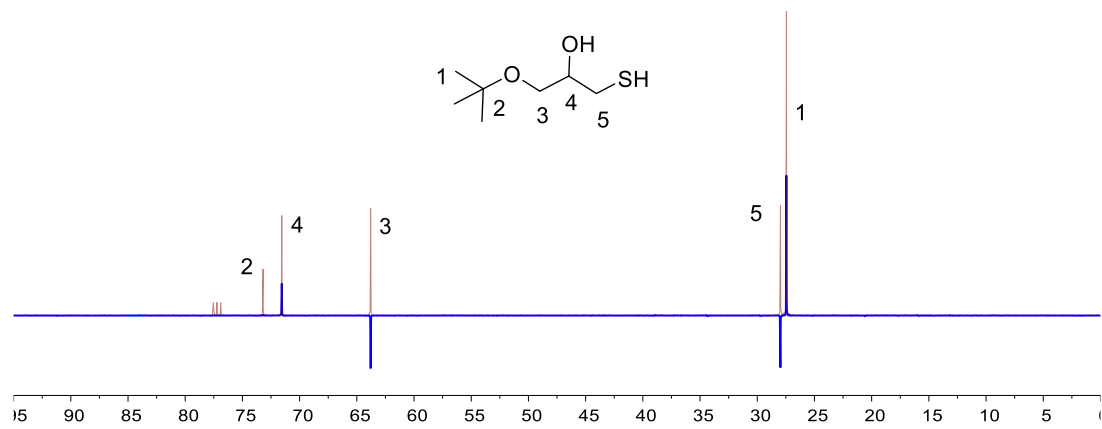

Figure S52.  $^{13}\text{C}$  NMR of 12b.



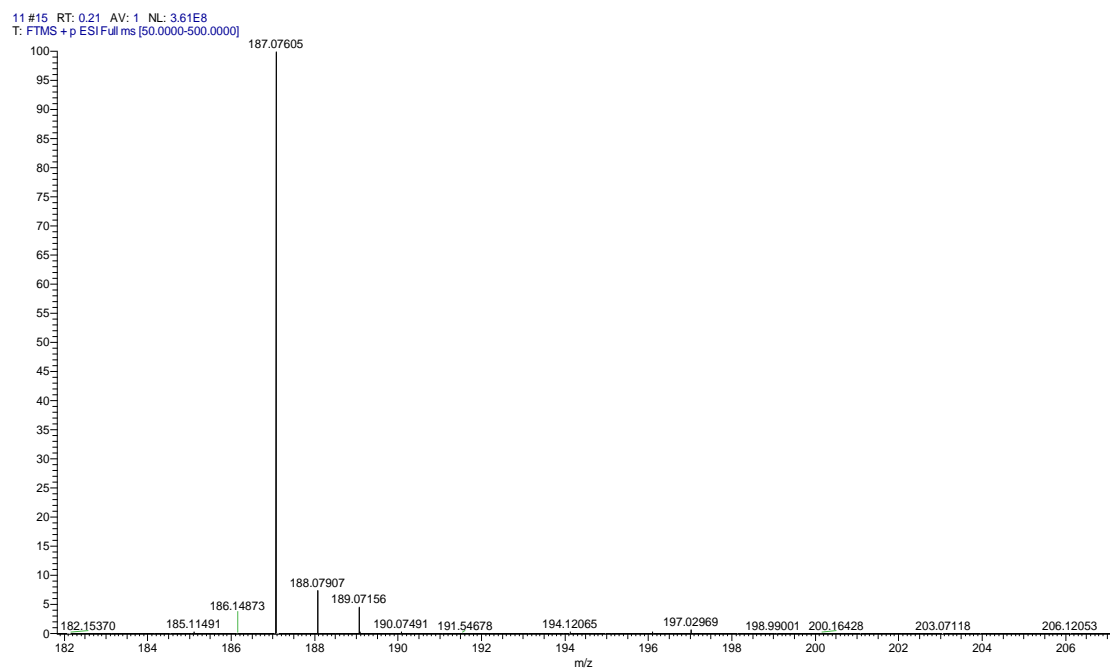

Figure S53. ESI-MS of 12b.

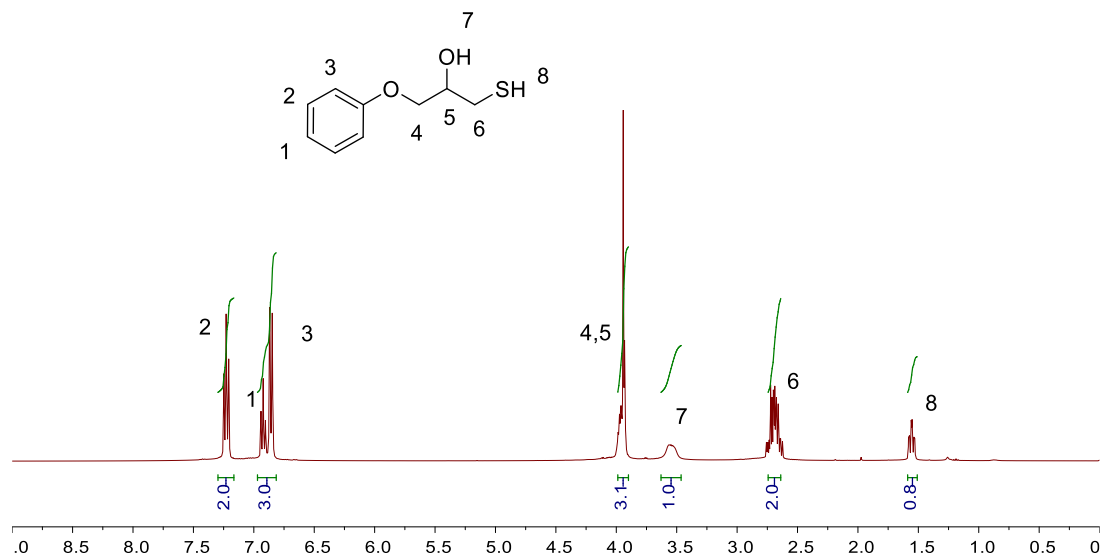

Figure S54.  $^1\text{H}$  NMR of 13b.

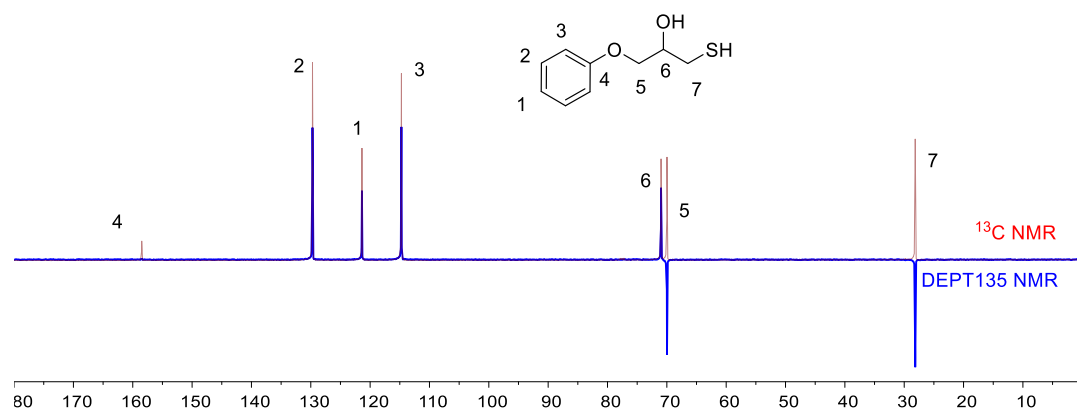

**Figure S55.** <sup>13</sup>C NMR of 13b.

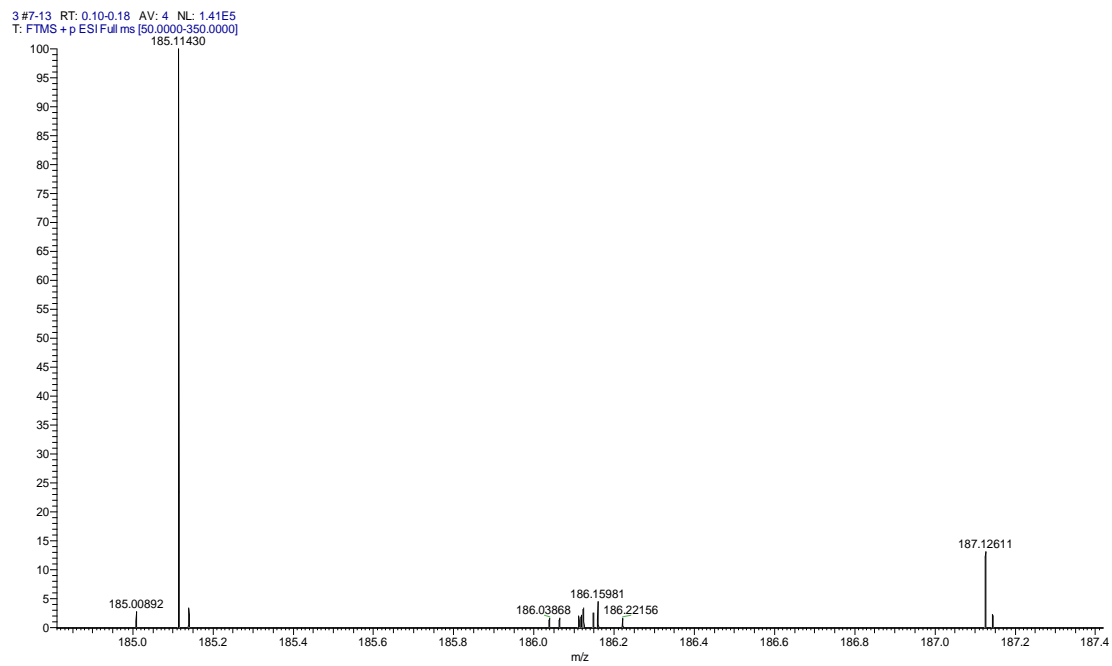

**Figure S56.** ESI-MS of 13b.

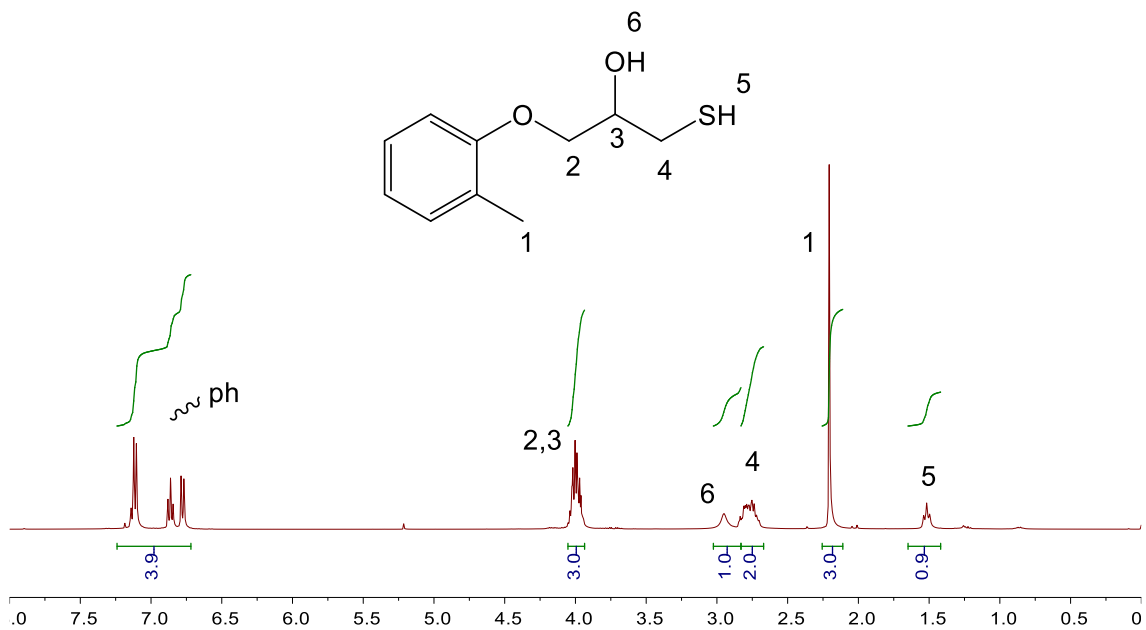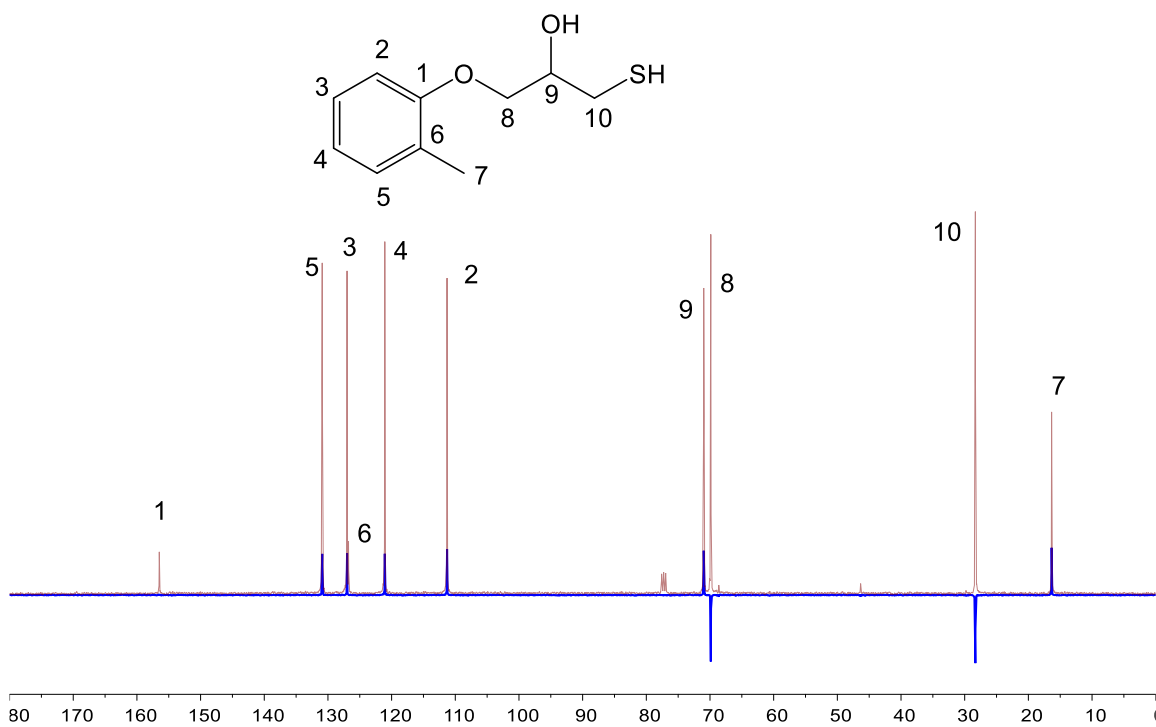

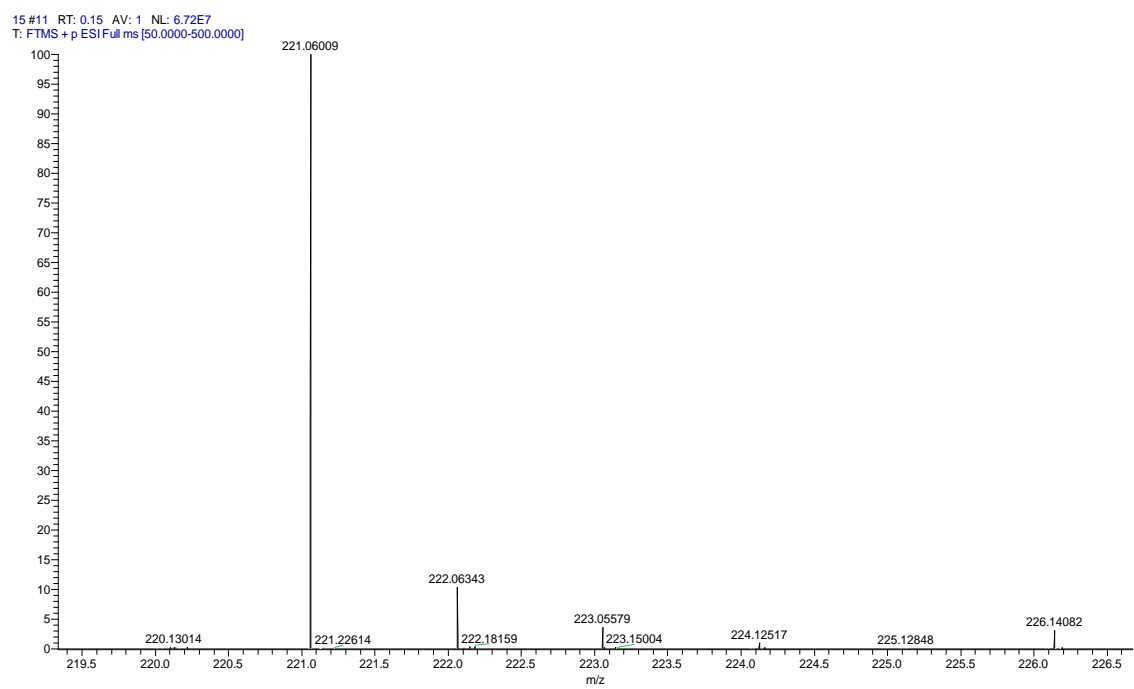

Figure S59.  $^{13}\text{C}$  NMR of 14b.

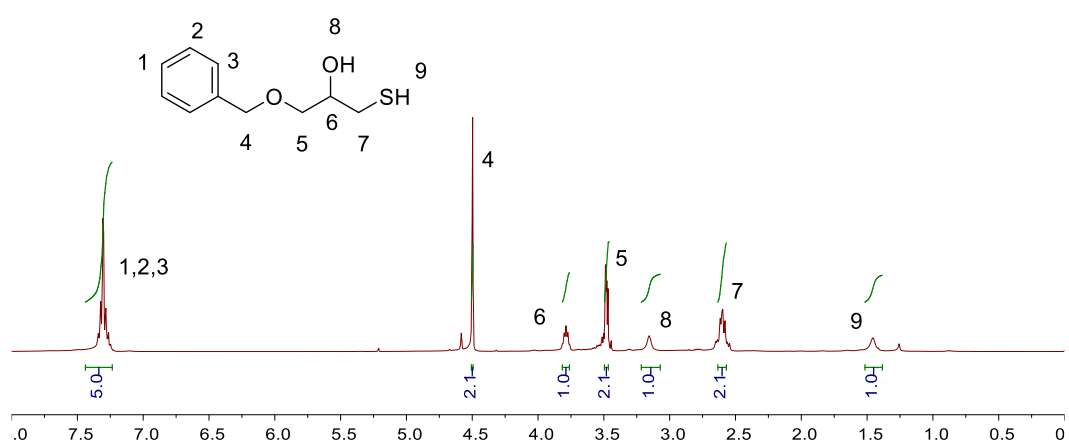

Figure S60.  $^1\text{H}$  NMR of 15b.

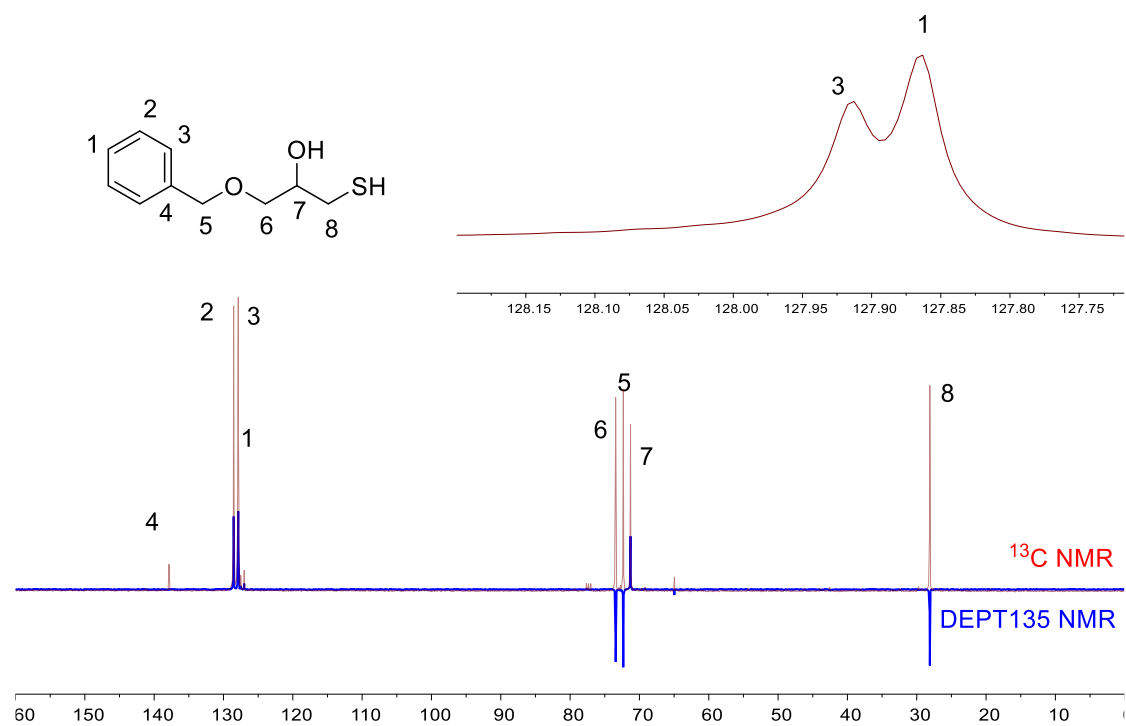

**Figure S61.**  $^{13}\text{C}$  NMR of 15b.

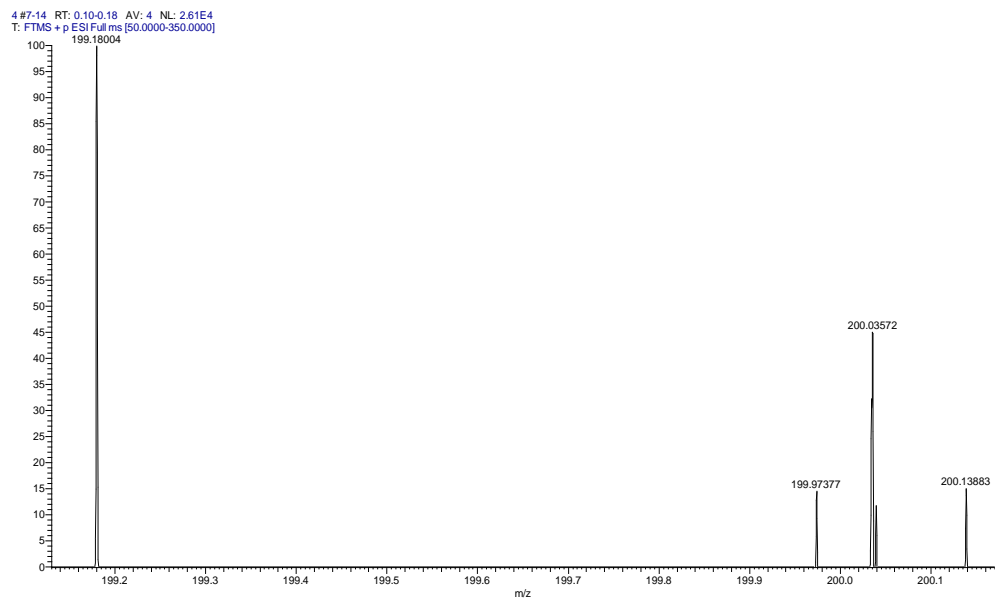

**Figure S62.** ESI-MS of 15b.

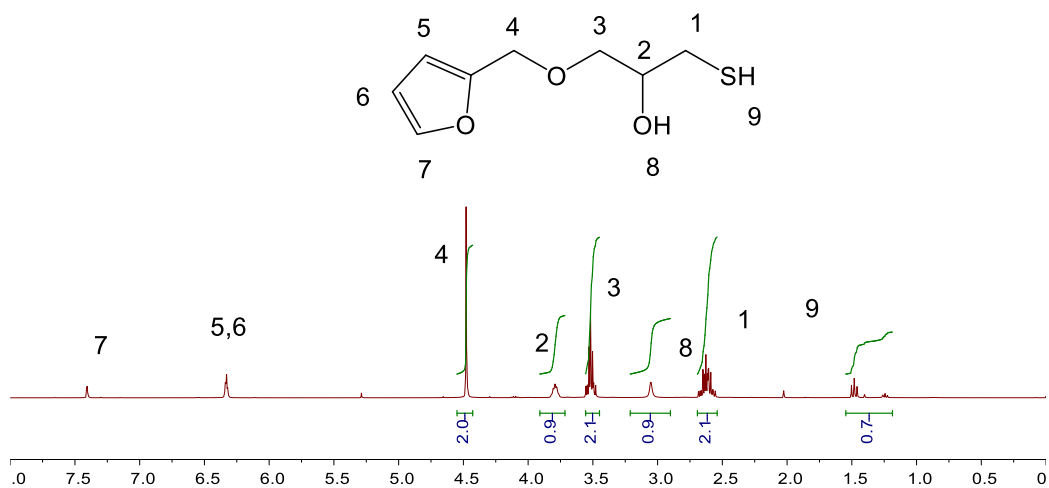

Figure S63. <sup>1</sup>H NMR of 16b.

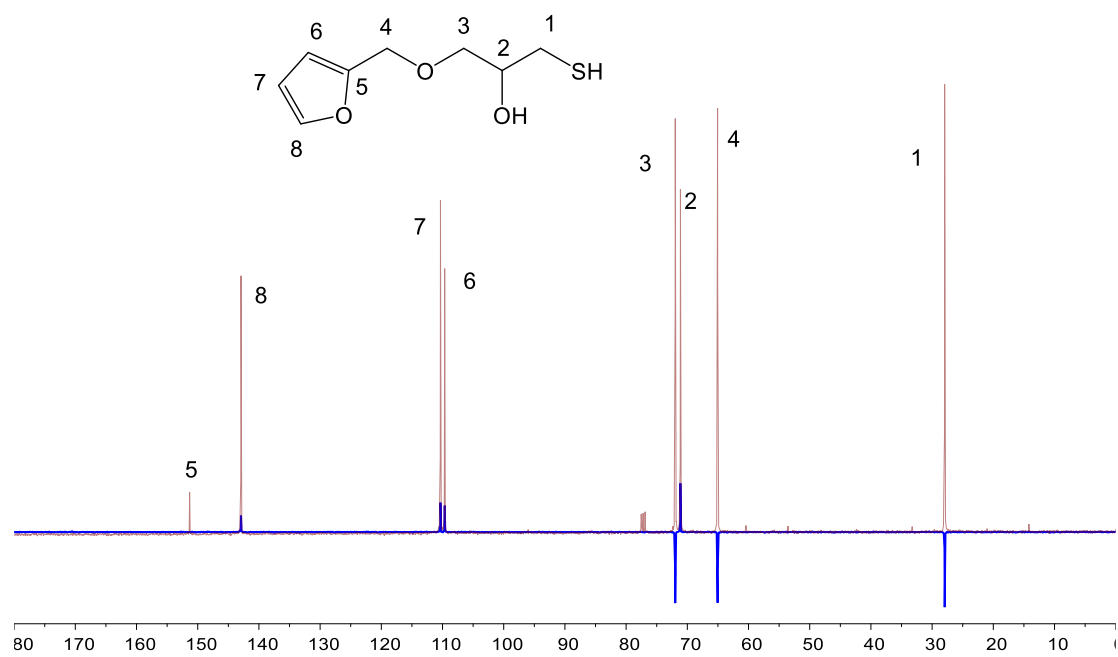

Figure S64. <sup>13</sup>C NMR of 16b.

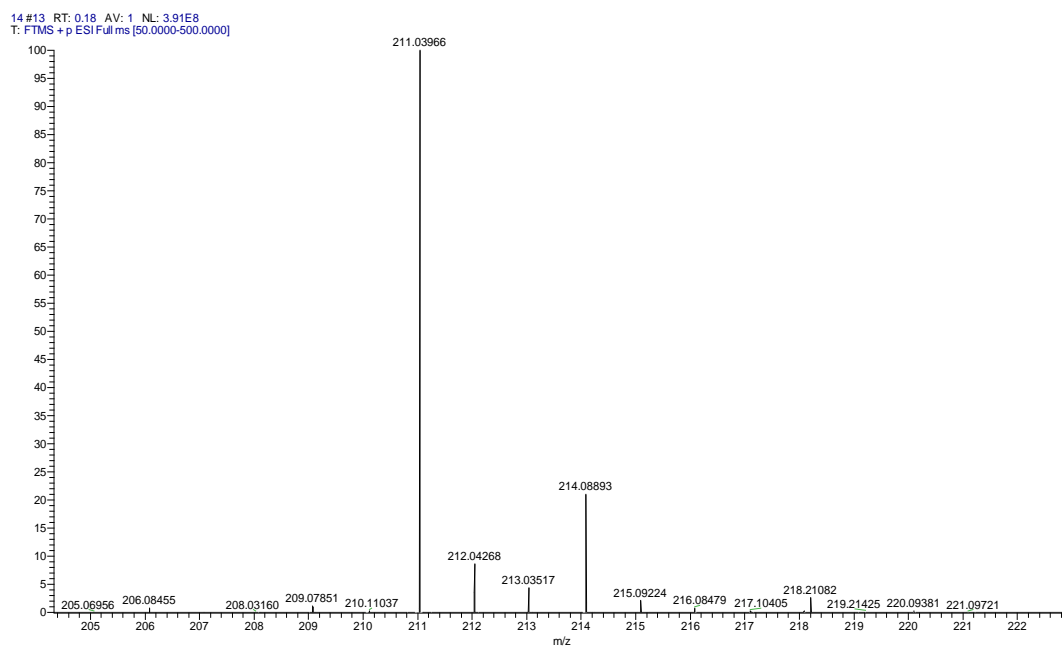

Figure S65. ESI-MS of 16b.

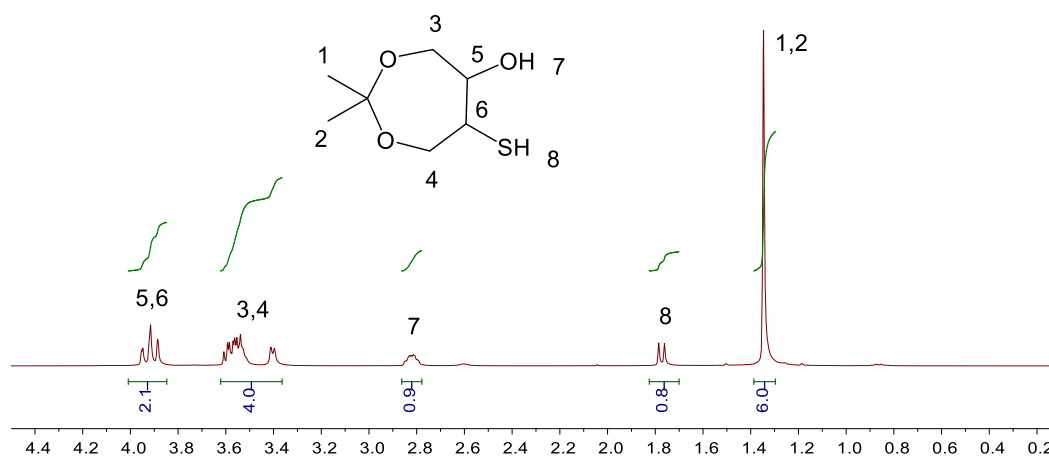

Figure S66.  $^1\text{H}$  NMR of 17b.

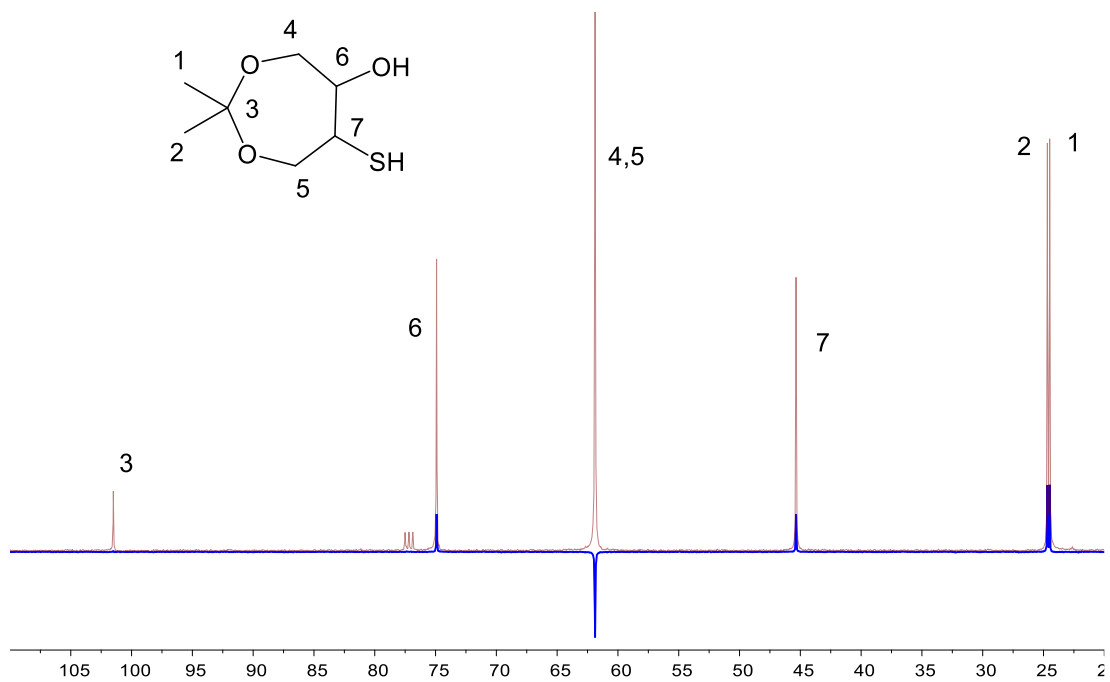

Figure S67. <sup>13</sup>C NMR of 17b.

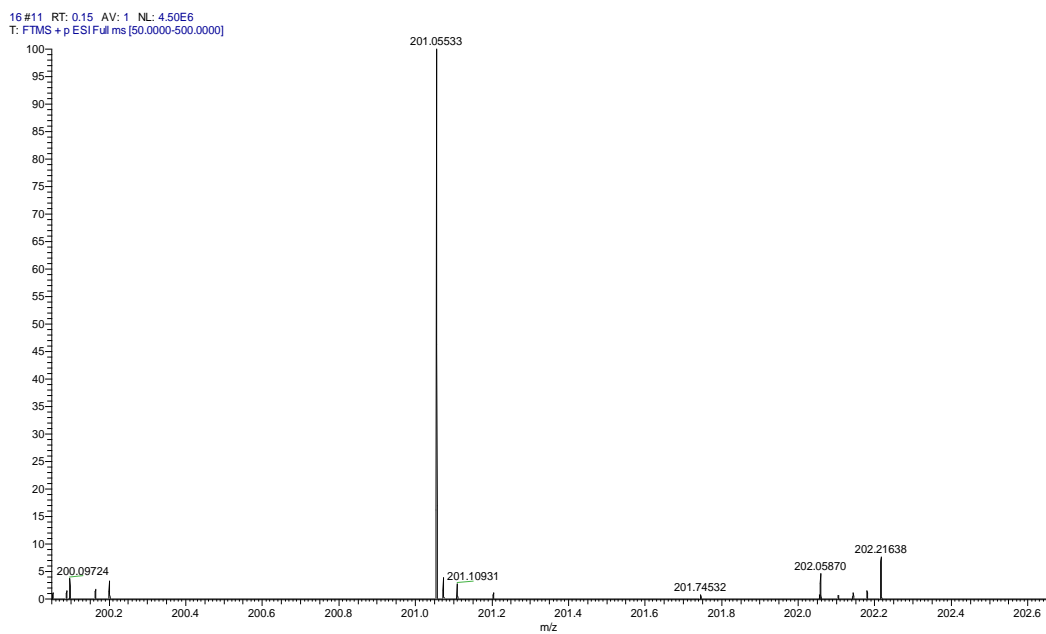

Figure S68. ESI-MS of 17b.



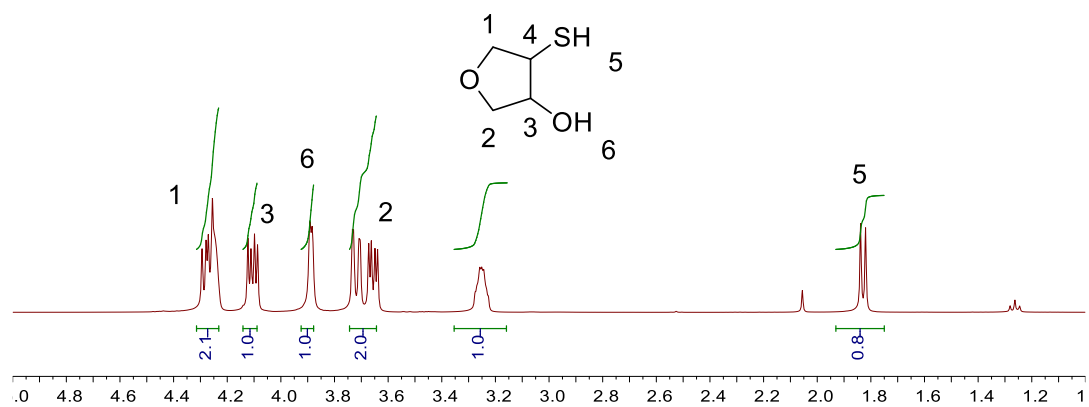

Figure S69. <sup>1</sup>H NMR of 18b.

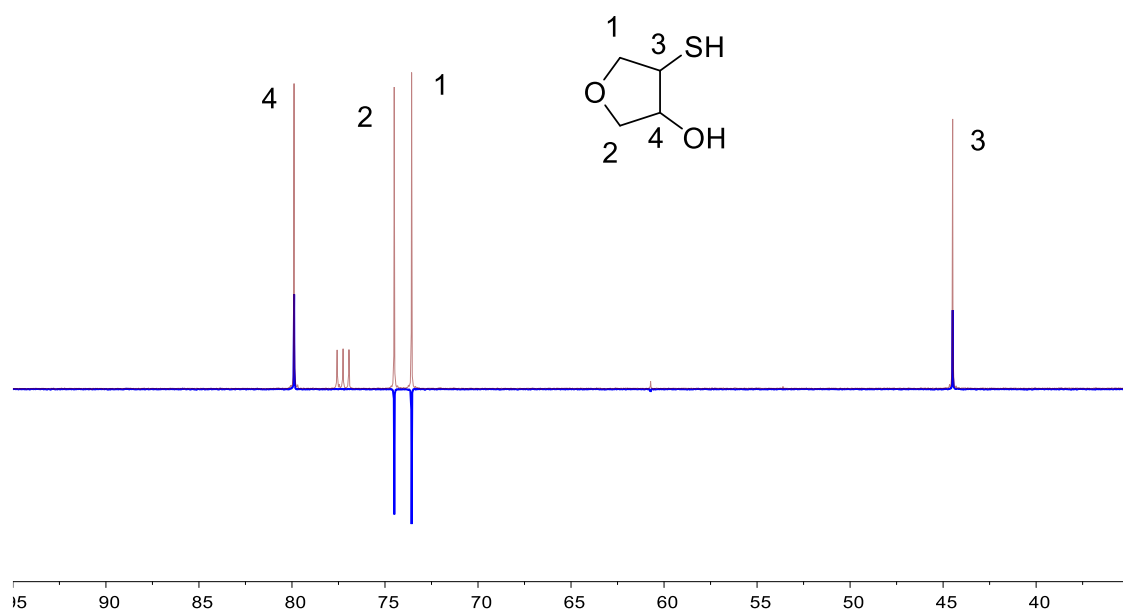

Figure S70. <sup>13</sup>C NMR of 18b.

23 #10 RT: 0.14 AV: 1 NL: 2.08E7  
T: FTMS - p ESI Full ms [50.0000-500.0000]

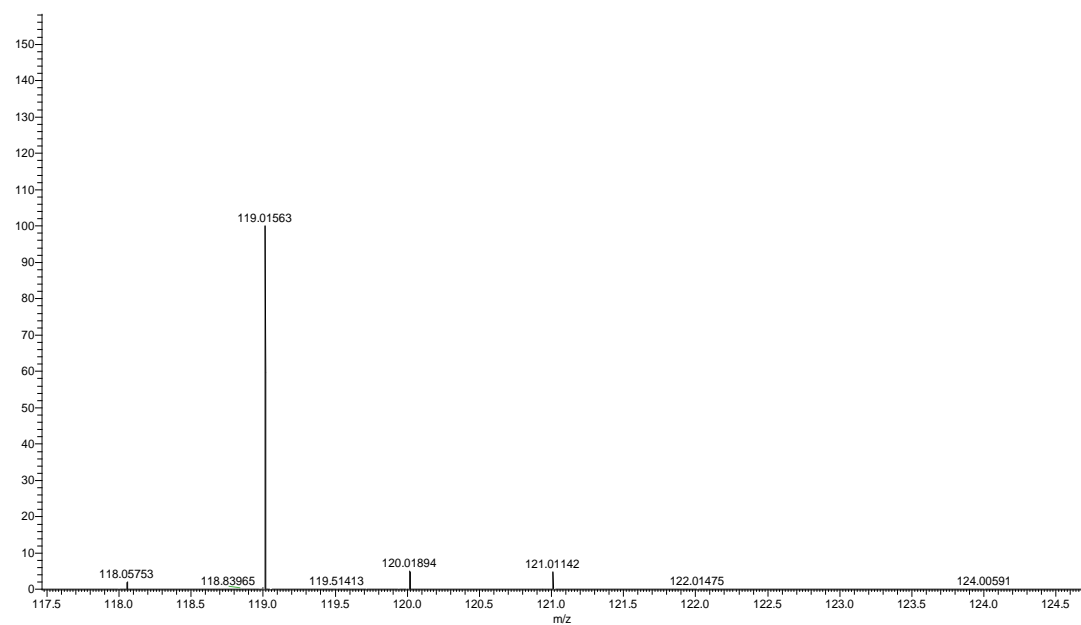

Figure S71. ESI-MS of 18b.

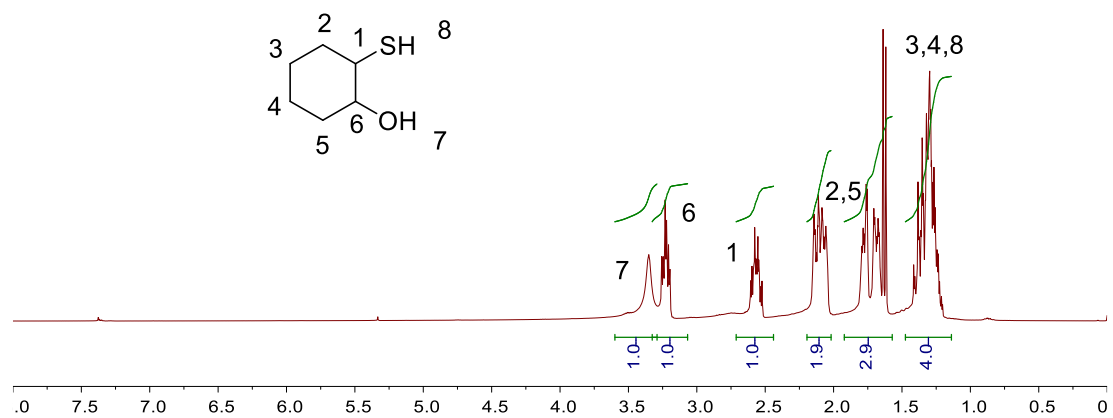

Figure S72. <sup>1</sup>H NMR of 19b.

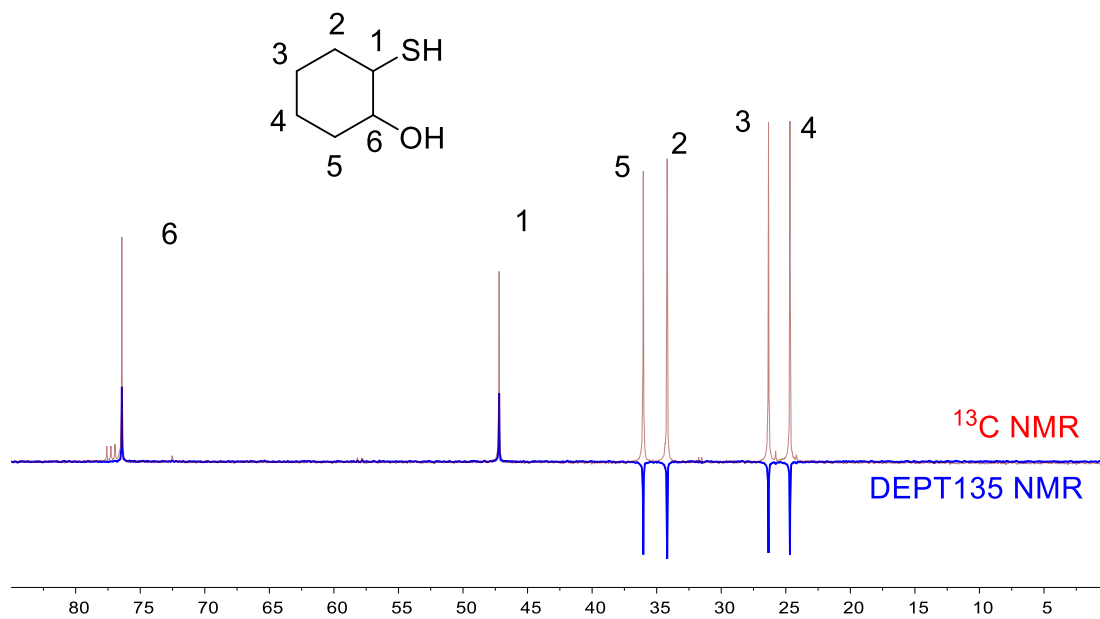

Figure S73. <sup>13</sup>C NMR of 19b.

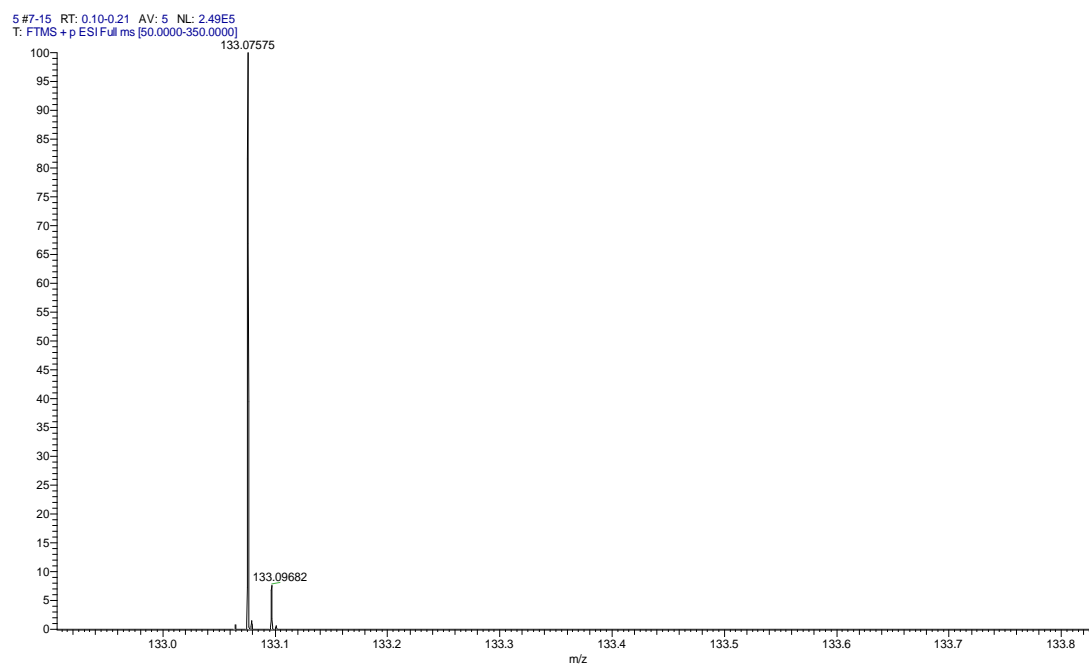

Figure S74. ESI-MS of 19b.

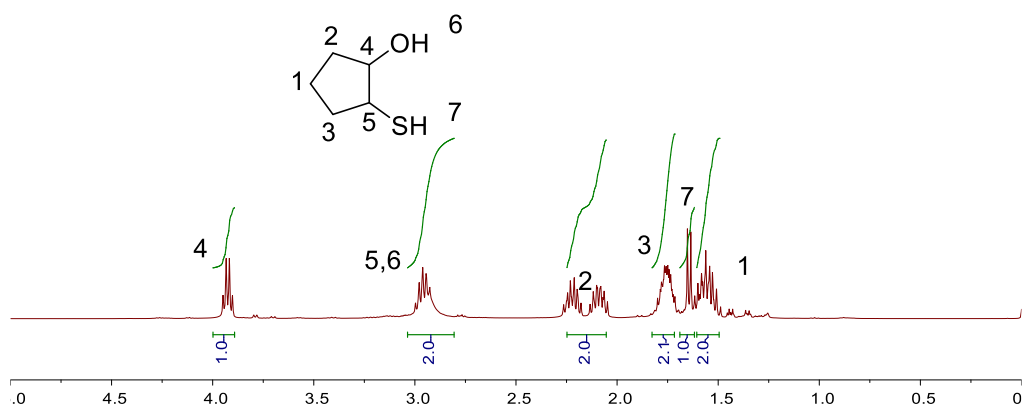

Figure S75.  $^1\text{H}$  NMR of 20b.

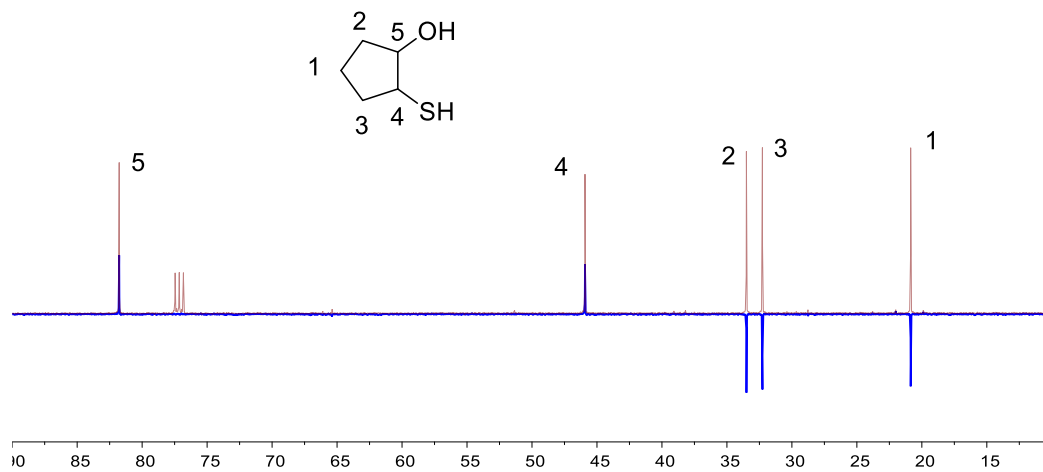

Figure S76.  $^{13}\text{C}$  NMR of 20b.

22 #10 RT: 0.14 AV: 1 NL: 2.57E6  
T: FTMS - p ESI Full ms [50.0000-500.0000]

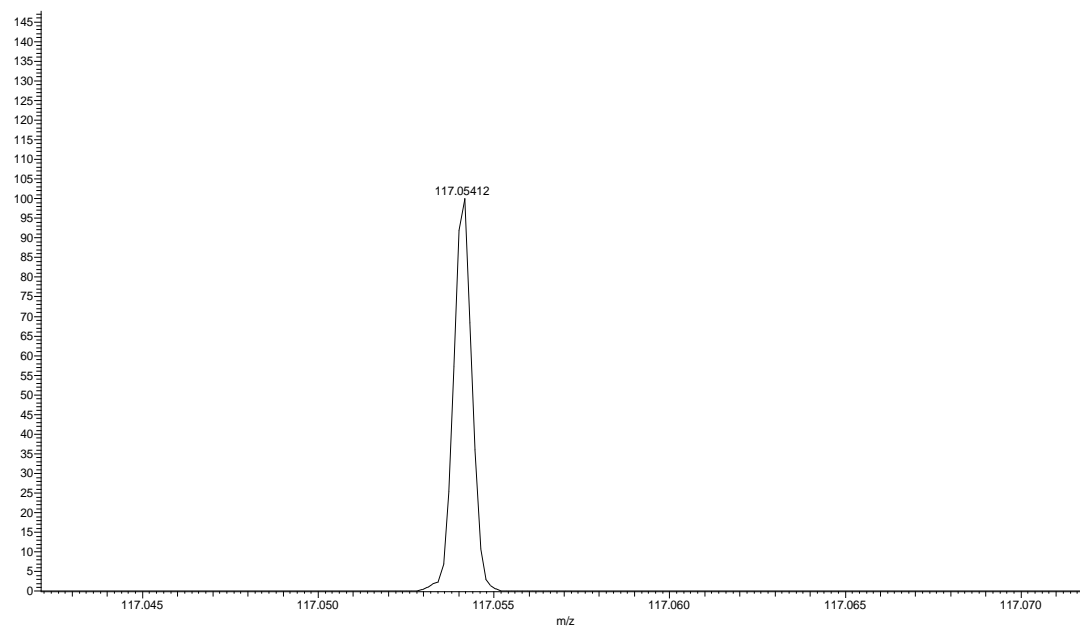

Figure S77. ESI-MS of 20b.

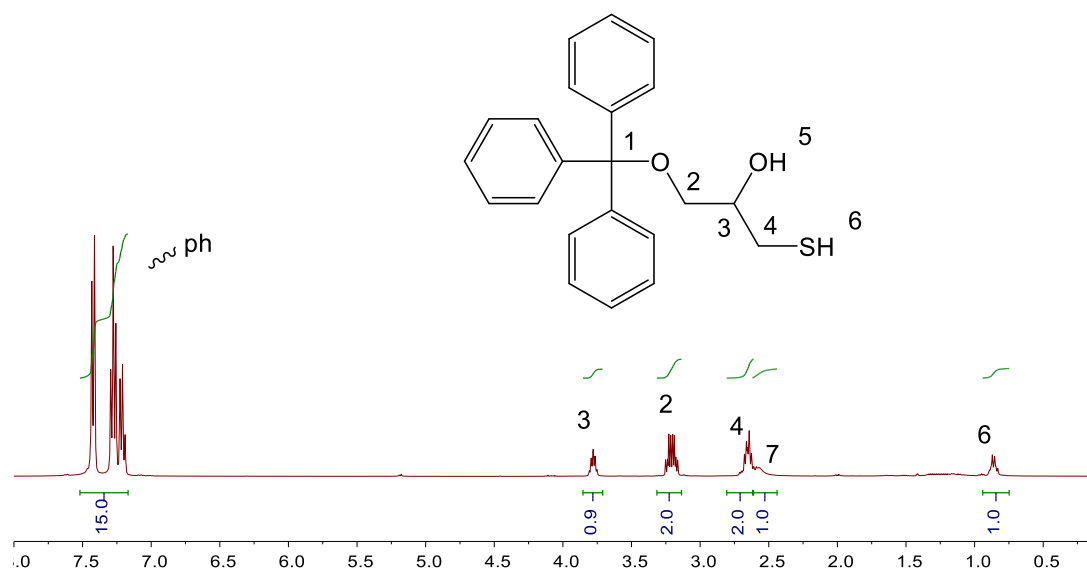

Figure S78. <sup>1</sup>H NMR of 21b.

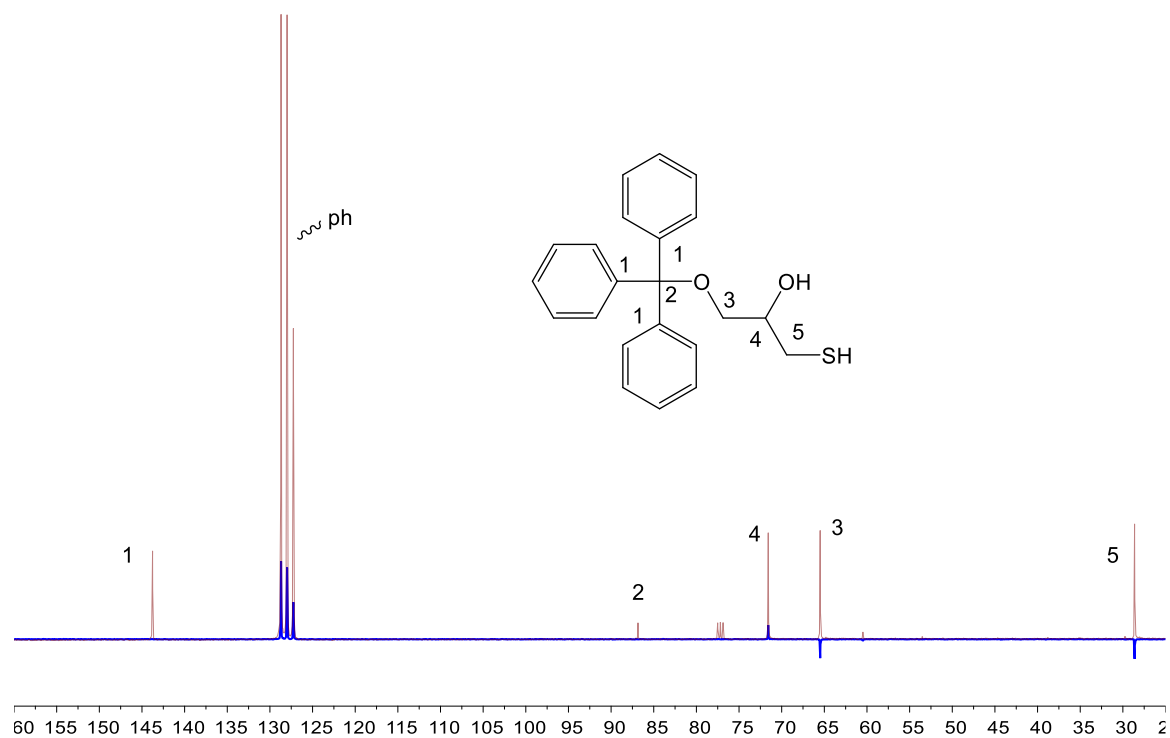

**Figure S79.** <sup>13</sup>C NMR of 21b.

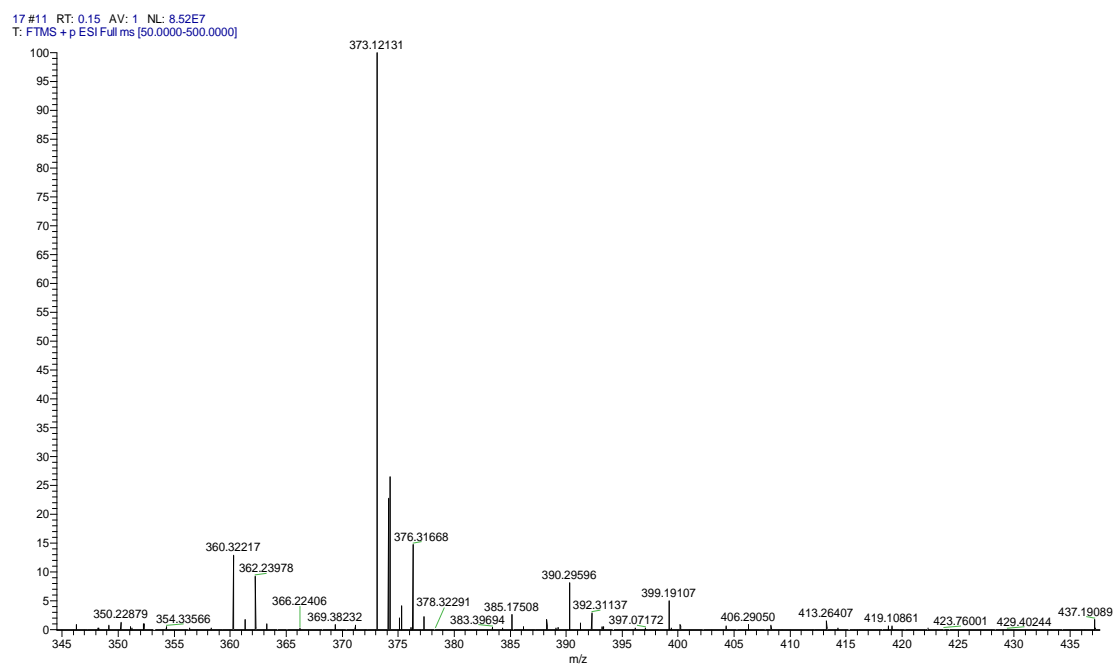

**Figure S80.** <sup>13</sup>C NMR of 21b.

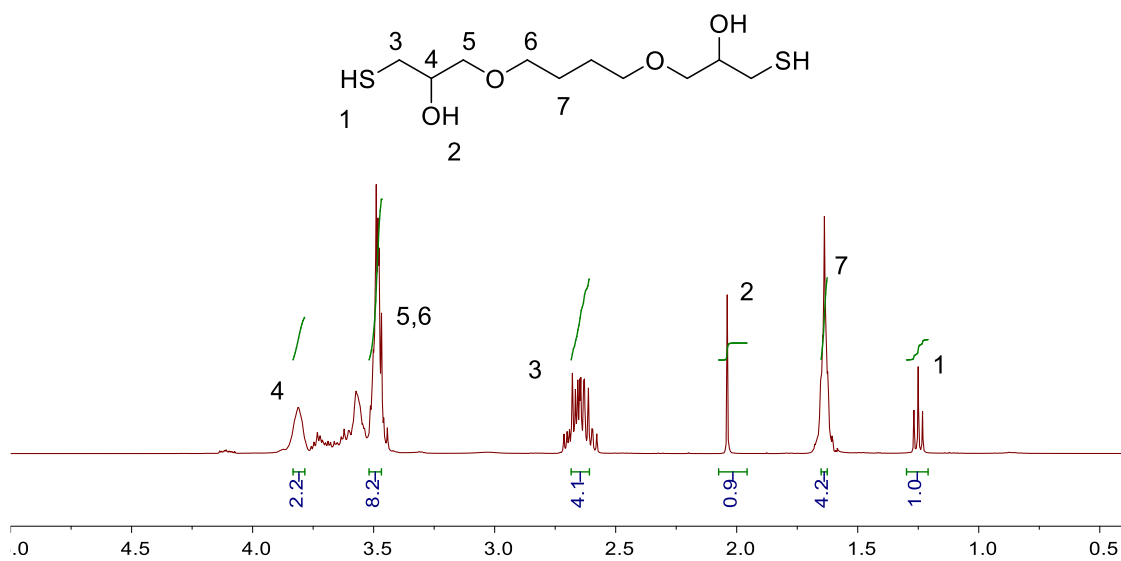

Figure S81.  $^1\text{H}$  NMR of 22b.

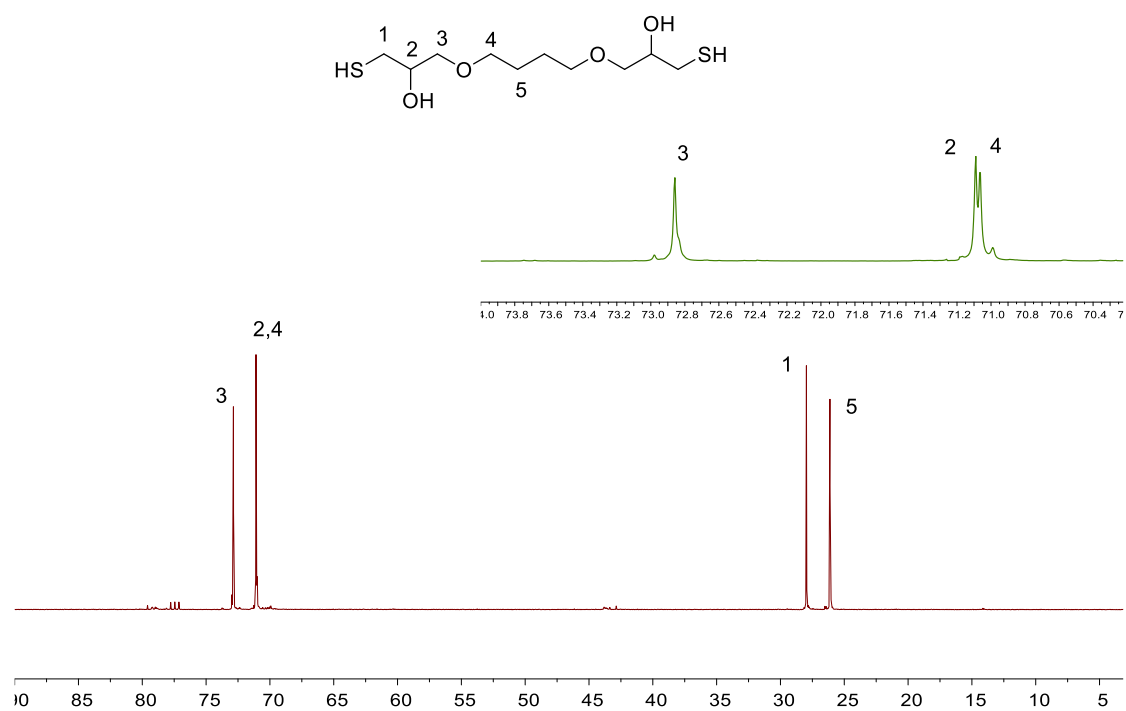

Figure S82.  $^{13}\text{C}$  NMR of 22b.

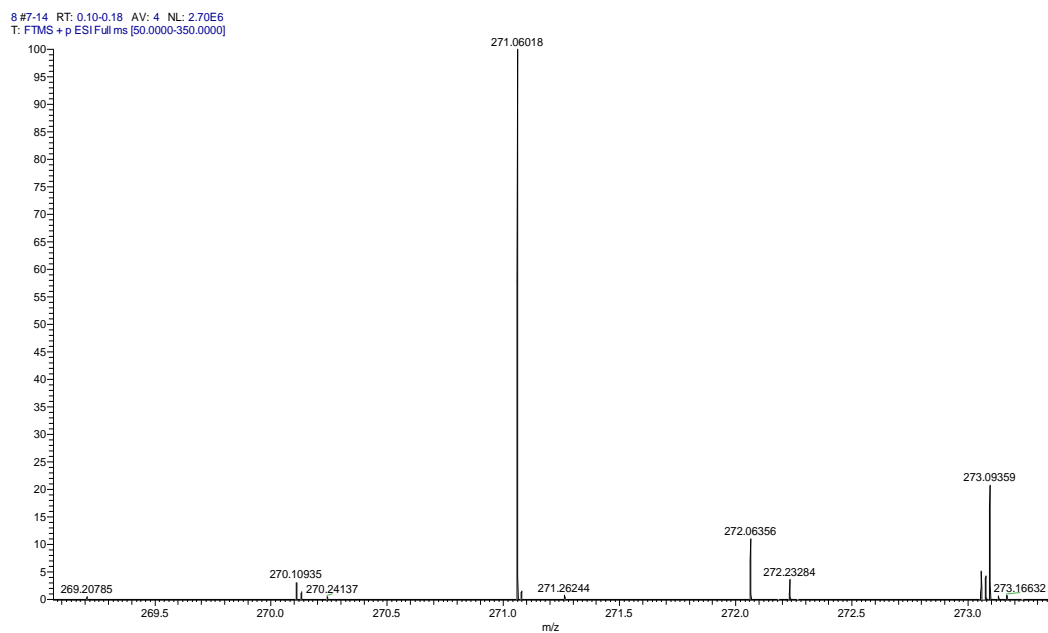

**Figure S83.** ESI-MS of 22b.

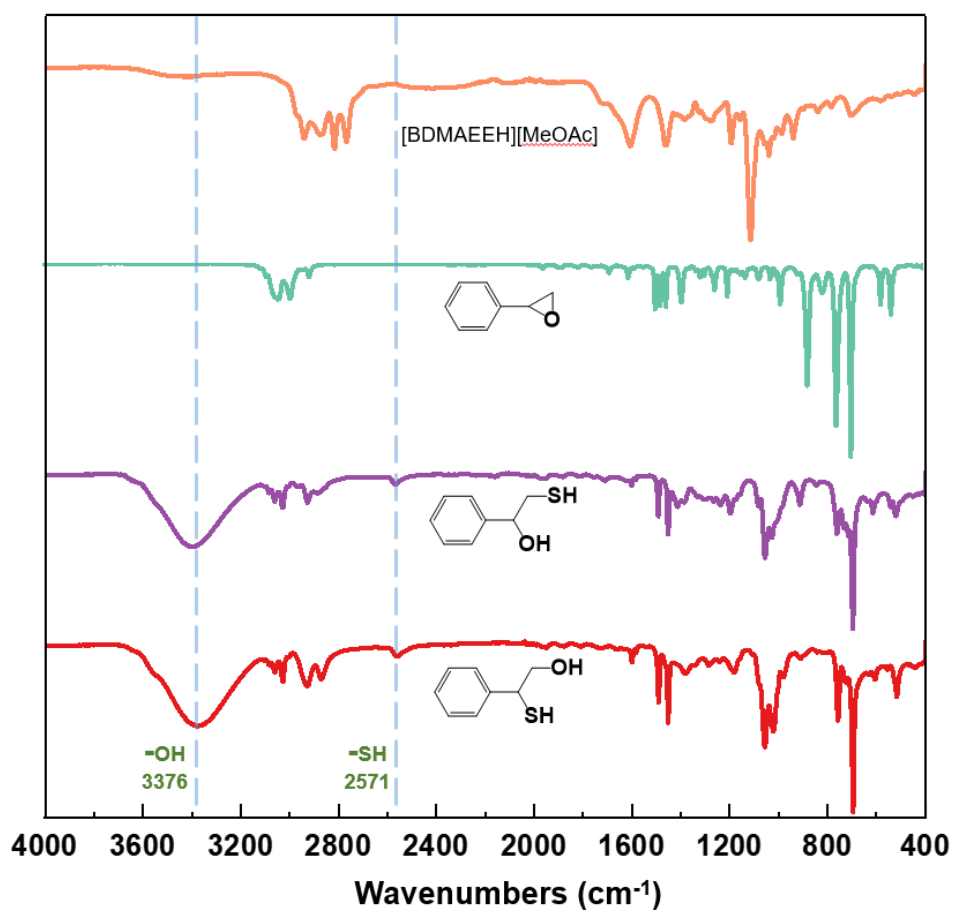

**Figure S84.** The FT-IR details of pure (1a), (1b), (1c), and [BDMAEEH][MeOAc].



## Theoretical calculation method

All the structures were fully optimized with the DFT method including the dispersion corrections (B3LYP) method using the Empirical Dispersion = GD3BJ keyword.<sup>[1]</sup> 6-311g(d,p) basis set was used for all atoms [abbreviation as B3LYP/6-311g(d,p)]. The influence of water solvent was investigated in condensed phase using the Polarizable Continuum Model (PCM) at B3LYP/6-311g(d,p) method. Energy calculations and Zero-point energy (ZPE) correction have been done by using the same level of theory. The computed stationary points have been characterized as minima or transition states by diagonalizing the Hessian matrix and analyzing the vibrational normal modes. In this way, if the imaginary frequency is not displayed, the stationary point can be classified as minima, and if only one imaginary frequency is obtained, the stationary point can be classified as a transition state. The particular nature of the transition states has been determined by analyzing the motion described by the eigenvector associated with the imaginary frequency. All calculations were performed with the Gaussian 09 suite of programs.<sup>[2]</sup>

## The coordinates of the optimized structures

| Components |   | Rea      |          |          |
|------------|---|----------|----------|----------|
| 1          | 7 | -5.00465 | -0.03353 | 0.133381 |
| 2          | 6 | -5.62591 | -0.93861 | -0.83542 |
| 3          | 1 | -6.71156 | -0.87535 | -0.73524 |
| 4          | 1 | -5.35298 | -0.62931 | -1.84563 |

---

|    |   |          |          |          |
|----|---|----------|----------|----------|
| 5  | 1 | -5.32866 | -1.98522 | -0.69349 |
| 6  | 6 | -5.34699 | -0.37126 | 1.516257 |
| 7  | 1 | -4.88234 | 0.350675 | 2.189725 |
| 8  | 1 | -6.43049 | -0.31157 | 1.63844  |
| 9  | 1 | -5.02462 | -1.38027 | 1.80243  |
| 10 | 6 | -3.57552 | 0.20016  | -0.09255 |
| 11 | 1 | -3.45376 | 0.592617 | -1.10595 |
| 12 | 1 | -3.24761 | 0.979114 | 0.601226 |
| 13 | 6 | -2.66286 | -1.01298 | 0.073848 |
| 14 | 1 | -2.74219 | -1.43248 | 1.085237 |
| 15 | 1 | -2.92253 | -1.80391 | -0.64178 |
| 16 | 8 | -1.33945 | -0.55625 | -0.16101 |
| 17 | 6 | -0.36499 | -1.58315 | -0.04766 |
| 18 | 1 | -0.42208 | -2.04557 | 0.94603  |
| 19 | 1 | -0.55252 | -2.36447 | -0.79579 |
| 20 | 6 | 0.988092 | -0.91304 | -0.26703 |
| 21 | 1 | 1.132337 | -0.13847 | 0.488465 |
| 22 | 1 | 0.980946 | -0.42436 | -1.2447  |
| 23 | 7 | 2.166313 | -1.79612 | -0.21612 |
| 24 | 6 | 2.221231 | -2.76822 | -1.31703 |
| 25 | 1 | 3.201839 | -3.24745 | -1.31899 |
| 26 | 1 | 1.456333 | -3.5482  | -1.22758 |

---

---

|    |    |          |          |          |
|----|----|----------|----------|----------|
| 27 | 1  | 2.0847   | -2.24726 | -2.26578 |
| 28 | 6  | 2.35488  | -2.43845 | 1.093775 |
| 29 | 1  | 1.581973 | -3.18322 | 1.313061 |
| 30 | 1  | 3.325688 | -2.93741 | 1.103948 |
| 31 | 1  | 2.351124 | -1.66768 | 1.864147 |
| 32 | 1  | 3.350151 | -0.83392 | -0.33765 |
| 33 | 6  | 7.277266 | 2.420978 | -0.55433 |
| 34 | 1  | 7.892523 | 2.208365 | -1.42814 |
| 35 | 1  | 7.887896 | 2.311726 | 0.351743 |
| 36 | 1  | 6.916845 | 3.456678 | -0.61069 |
| 37 | 8  | 6.199922 | 1.496888 | -0.56579 |
| 38 | 6  | 5.335559 | 1.686554 | 0.528678 |
| 39 | 1  | 4.896871 | 2.694943 | 0.524768 |
| 40 | 1  | 5.867751 | 1.57347  | 1.484687 |
| 41 | 6  | 4.181525 | 0.698579 | 0.543982 |
| 42 | 8  | 4.180748 | -0.17998 | -0.42851 |
| 43 | 8  | 3.344891 | 0.768528 | 1.431996 |
| 44 | 16 | -6.28377 | 2.741173 | -0.38726 |
| 45 | 1  | -7.54166 | 2.266751 | -0.29206 |
| 46 | 1  | -5.6878  | 1.453545 | -0.14374 |

---

---

| Components |   |          | 1a       |          |
|------------|---|----------|----------|----------|
| 1          | 6 | -1.59921 | 0.600788 | -0.15822 |
| 2          | 6 | -2.58427 | -0.03884 | 0.734327 |
| 3          | 8 | -2.48722 | -0.42466 | -0.64412 |
| 4          | 6 | -0.14728 | 0.273506 | -0.09493 |
| 5          | 6 | 0.794817 | 1.307023 | -0.04234 |
| 6          | 6 | 2.156892 | 1.017273 | 0.051487 |
| 7          | 6 | 2.589341 | -0.30986 | 0.083952 |
| 8          | 6 | 1.652705 | -1.34538 | 0.020005 |
| 9          | 6 | 0.291953 | -1.05621 | -0.06916 |
| 10         | 1 | -1.83473 | 1.60012  | -0.52518 |
| 11         | 1 | -3.49419 | 0.494479 | 1.007379 |
| 12         | 1 | -2.23647 | -0.78312 | 1.449687 |
| 13         | 1 | 0.460134 | 2.340959 | -0.0741  |
| 14         | 1 | 2.879007 | 1.827691 | 0.092966 |
| 15         | 1 | 3.649358 | -0.5366  | 0.1525   |
| 16         | 1 | 1.983922 | -2.37993 | 0.03548  |
| 17         | 1 | -0.43896 | -1.85609 | -0.13652 |

---

---

| Components |   |          | Rea-1a   |          |
|------------|---|----------|----------|----------|
| 1          | 7 | 3.81012  | -0.9577  | -1.44753 |
| 2          | 6 | 4.208977 | -2.33277 | -1.01586 |
| 3          | 1 | 5.29087  | -2.4146  | -1.09796 |
| 4          | 1 | 3.89125  | -2.46013 | 0.019213 |
| 5          | 1 | 3.733836 | -3.06695 | -1.66195 |
| 6          | 6 | 4.203506 | -0.67123 | -2.85898 |
| 7          | 1 | 3.885634 | 0.338354 | -3.11051 |
| 8          | 1 | 5.285699 | -0.75031 | -2.93547 |
| 9          | 1 | 3.734741 | -1.39179 | -3.52469 |
| 10         | 6 | 2.36763  | -0.65094 | -1.15248 |
| 11         | 1 | 2.252298 | -0.79932 | -0.07938 |
| 12         | 1 | 2.213192 | 0.399878 | -1.38848 |
| 13         | 6 | 1.356153 | -1.49482 | -1.92624 |
| 14         | 1 | 1.48569  | -1.38162 | -3.0032  |
| 15         | 1 | 1.441115 | -2.55852 | -1.67734 |
| 16         | 8 | 0.050835 | -1.01935 | -1.63662 |
| 17         | 6 | -0.48068 | -1.48688 | -0.39565 |
| 18         | 1 | -0.57281 | -2.57923 | -0.42741 |
| 19         | 1 | 0.17993  | -1.22789 | 0.43775  |
| 20         | 6 | -1.8439  | -0.8185  | -0.25289 |

---

---

|    |   |          |          |          |
|----|---|----------|----------|----------|
| 21 | 1 | -2.469   | -1.08768 | -1.1064  |
| 22 | 1 | -1.7045  | 0.265169 | -0.27481 |
| 23 | 7 | -2.60139 | -1.14887 | 0.966354 |
| 24 | 6 | -1.98321 | -0.6395  | 2.19845  |
| 25 | 1 | -2.67044 | -0.79828 | 3.031113 |
| 26 | 1 | -1.03377 | -1.13433 | 2.432992 |
| 27 | 1 | -1.80702 | 0.432133 | 2.094431 |
| 28 | 6 | -2.94527 | -2.57506 | 1.0691   |
| 29 | 1 | -2.06996 | -3.20887 | 1.249325 |
| 30 | 1 | -3.64329 | -2.70923 | 1.897476 |
| 31 | 1 | -3.43678 | -2.8828  | 0.14637  |
| 32 | 1 | -3.93582 | -0.42519 | 0.753688 |
| 33 | 6 | -8.30614 | 2.031909 | -0.20044 |
| 34 | 1 | -8.4684  | 2.811127 | 0.543763 |
| 35 | 1 | -9.13952 | 1.317901 | -0.16258 |
| 36 | 1 | -8.28013 | 2.487195 | -1.19933 |
| 37 | 8 | -7.07261 | 1.403427 | 0.113458 |
| 38 | 6 | -6.7659  | 0.370915 | -0.79244 |
| 39 | 1 | -6.69017 | 0.748556 | -1.82228 |
| 40 | 1 | -7.54476 | -0.40611 | -0.79346 |
| 41 | 6 | -5.45022 | -0.31847 | -0.47308 |
| 42 | 8 | -4.84467 | 0.10113  | 0.611391 |

---

---

|    |    |          |          |          |
|----|----|----------|----------|----------|
| 43 | 8  | -5.04006 | -1.19977 | -1.21325 |
| 44 | 8  | 5.399323 | 0.790746 | -0.01418 |
| 45 | 6  | 5.381472 | 0.853811 | 1.435532 |
| 46 | 1  | 6.364155 | 0.956009 | 1.883146 |
| 47 | 1  | 4.71136  | 0.137481 | 1.901986 |
| 48 | 6  | 4.835749 | 1.967825 | 0.656637 |
| 49 | 1  | 5.468343 | 2.838288 | 0.511974 |
| 50 | 1  | 4.359432 | -0.29536 | -0.85402 |
| 51 | 16 | 2.662278 | -1.70976 | 2.457652 |
| 52 | 1  | 2.805934 | -3.01326 | 2.78529  |
| 53 | 6  | 3.375727 | 2.194689 | 0.468636 |
| 54 | 6  | 2.427414 | 1.688714 | 1.360111 |
| 55 | 6  | 2.944852 | 2.905483 | -0.65852 |
| 56 | 6  | 1.067906 | 1.867863 | 1.115034 |
| 57 | 1  | 2.743904 | 1.140205 | 2.237347 |
| 58 | 6  | 1.586517 | 3.07733  | -0.90687 |
| 59 | 1  | 3.677752 | 3.309283 | -1.3482  |
| 60 | 6  | 0.644372 | 2.552578 | -0.02111 |
| 61 | 1  | 0.342536 | 1.465411 | 1.810665 |
| 62 | 1  | 1.262418 | 3.616736 | -1.78871 |
| 63 | 1  | -0.41367 | 2.682601 | -0.21463 |

---

---

| Components |   |          | TS-1b    |          |
|------------|---|----------|----------|----------|
| 1          | 7 | -3.51582 | -2.09202 | 0.027333 |
| 2          | 6 | -4.29937 | -2.84864 | -0.9882  |
| 3          | 1 | -5.32426 | -2.93808 | -0.63313 |
| 4          | 1 | -4.28323 | -2.29353 | -1.92386 |
| 5          | 1 | -3.87268 | -3.83921 | -1.13291 |
| 6          | 6 | -3.52619 | -2.76422 | 1.357279 |
| 7          | 1 | -2.91702 | -2.18085 | 2.044831 |
| 8          | 1 | -4.55319 | -2.79522 | 1.714652 |
| 9          | 1 | -3.13479 | -3.776   | 1.272841 |
| 10         | 6 | -2.14292 | -1.72299 | -0.4304  |
| 11         | 1 | -2.24872 | -1.20257 | -1.38169 |
| 12         | 1 | -1.74719 | -1.0192  | 0.2968   |
| 13         | 6 | -1.15453 | -2.87238 | -0.57334 |
| 14         | 1 | -0.99937 | -3.37453 | 0.387283 |
| 15         | 1 | -1.47976 | -3.62056 | -1.30529 |
| 16         | 8 | 0.03973  | -2.23641 | -0.99651 |
| 17         | 6 | 1.252258 | -2.87831 | -0.61778 |
| 18         | 1 | 1.171562 | -3.24897 | 0.410237 |
| 19         | 1 | 1.459723 | -3.73066 | -1.27598 |
| 20         | 6 | 2.318356 | -1.79029 | -0.72094 |

---



---

|    |   |          |          |          |
|----|---|----------|----------|----------|
| 21 | 1 | 2.026408 | -0.96598 | -0.06864 |
| 22 | 1 | 2.335696 | -1.41128 | -1.74581 |
| 23 | 7 | 3.694721 | -2.16581 | -0.35819 |
| 24 | 6 | 4.325336 | -3.08759 | -1.31258 |
| 25 | 1 | 5.386043 | -3.17822 | -1.07219 |
| 26 | 1 | 3.878499 | -4.08841 | -1.2864  |
| 27 | 1 | 4.228488 | -2.68461 | -2.32167 |
| 28 | 6 | 3.823823 | -2.63565 | 1.029418 |
| 29 | 1 | 3.356431 | -3.61405 | 1.188474 |
| 30 | 1 | 4.884088 | -2.71837 | 1.275302 |
| 31 | 1 | 3.368241 | -1.89981 | 1.69175  |
| 32 | 1 | 4.402507 | -0.80304 | -0.37406 |
| 33 | 6 | 6.44101  | 3.873201 | -0.43198 |
| 34 | 1 | 7.275868 | 3.906307 | -1.13138 |
| 35 | 1 | 6.795955 | 4.158585 | 0.567085 |
| 36 | 1 | 5.674846 | 4.592304 | -0.75053 |
| 37 | 8 | 5.93904  | 2.54515  | -0.44247 |
| 38 | 6 | 4.847273 | 2.3914   | 0.431593 |
| 39 | 1 | 4.019641 | 3.064547 | 0.162851 |
| 40 | 1 | 5.125067 | 2.625046 | 1.469516 |
| 41 | 6 | 4.288609 | 0.979706 | 0.42457  |
| 42 | 8 | 4.866237 | 0.149679 | -0.40755 |

---

---

|    |    |          |          |          |
|----|----|----------|----------|----------|
| 43 | 8  | 3.356748 | 0.698891 | 1.16583  |
| 44 | 8  | -4.90671 | 0.056289 | 0.518989 |
| 45 | 6  | -4.90527 | 1.462625 | -0.61462 |
| 46 | 1  | -5.95194 | 1.693688 | -0.69665 |
| 47 | 1  | -4.3794  | 1.090066 | -1.47617 |
| 48 | 6  | -4.30808 | 1.338389 | 0.705913 |
| 49 | 1  | -4.80531 | 1.910576 | 1.493479 |
| 50 | 1  | -4.03794 | -1.15006 | 0.18007  |
| 51 | 16 | -4.45986 | 3.89738  | -1.4884  |
| 52 | 1  | -5.72371 | 4.111223 | -1.91494 |
| 53 | 6  | -2.8138  | 1.334546 | 0.882039 |
| 54 | 6  | -1.93411 | 1.723607 | -0.12993 |
| 55 | 6  | -2.2902  | 0.858343 | 2.089979 |
| 56 | 6  | -0.55555 | 1.61837  | 0.055406 |
| 57 | 1  | -2.32522 | 2.108862 | -1.0631  |
| 58 | 6  | -0.91435 | 0.74871  | 2.272671 |
| 59 | 1  | -2.96741 | 0.559403 | 2.88314  |
| 60 | 6  | -0.03891 | 1.125565 | 1.251952 |
| 61 | 1  | 0.117246 | 1.915943 | -0.74061 |
| 62 | 1  | -0.52373 | 0.368113 | 3.209345 |
| 63 | 1  | 1.033376 | 1.040036 | 1.384997 |

---

---

| Components |   |          | TS-1c    |          |
|------------|---|----------|----------|----------|
| 1          | 7 | -2.56517 | 2.88307  | -0.49111 |
| 2          | 6 | -2.94268 | 3.160562 | 0.923503 |
| 3          | 1 | -3.99533 | 3.434857 | 0.947011 |
| 4          | 1 | -2.78836 | 2.256308 | 1.508959 |
| 5          | 1 | -2.34306 | 3.974761 | 1.325091 |
| 6          | 6 | -2.78544 | 4.065099 | -1.37061 |
| 7          | 1 | -2.48532 | 3.807862 | -2.38464 |
| 8          | 1 | -3.84595 | 4.30893  | -1.3542  |
| 9          | 1 | -2.20877 | 4.916368 | -1.01365 |
| 10         | 6 | -1.20006 | 2.285303 | -0.63143 |
| 11         | 1 | -1.18584 | 1.395447 | -0.00246 |
| 12         | 1 | -1.09327 | 1.969485 | -1.6691  |
| 13         | 6 | -0.03836 | 3.208255 | -0.25849 |
| 14         | 1 | 0.030073 | 4.046755 | -0.95224 |
| 15         | 1 | -0.14982 | 3.609984 | 0.753962 |
| 16         | 8 | 1.175206 | 2.482105 | -0.37926 |
| 17         | 6 | 1.544207 | 1.764311 | 0.797985 |
| 18         | 1 | 1.801788 | 2.472212 | 1.594021 |
| 19         | 1 | 0.714686 | 1.142079 | 1.151073 |
| 20         | 6 | 2.74063  | 0.902212 | 0.408606 |

---

---

|    |   |          |          |          |
|----|---|----------|----------|----------|
| 21 | 1 | 3.536847 | 1.541293 | 0.022372 |
| 22 | 1 | 2.437092 | 0.229225 | -0.39741 |
| 23 | 7 | 3.320201 | 0.081923 | 1.485549 |
| 24 | 6 | 2.411444 | -0.95875 | 1.986128 |
| 25 | 1 | 2.971995 | -1.64155 | 2.626996 |
| 26 | 1 | 1.578449 | -0.54667 | 2.567961 |
| 27 | 1 | 2.007852 | -1.52203 | 1.143504 |
| 28 | 6 | 3.900781 | 0.878834 | 2.577123 |
| 29 | 1 | 3.142766 | 1.413045 | 3.160992 |
| 30 | 1 | 4.443499 | 0.211118 | 3.248809 |
| 31 | 1 | 4.605661 | 1.593032 | 2.151862 |
| 32 | 1 | 4.537044 | -0.59363 | 0.81383  |
| 33 | 6 | 8.622202 | -2.65082 | -1.43729 |
| 34 | 1 | 8.546044 | -3.73775 | -1.42897 |
| 35 | 1 | 9.530788 | -2.34883 | -0.89969 |
| 36 | 1 | 8.697488 | -2.30249 | -2.47588 |
| 37 | 8 | 7.455742 | -2.14475 | -0.80586 |
| 38 | 6 | 7.450634 | -0.73801 | -0.76565 |
| 39 | 1 | 7.49294  | -0.30661 | -1.77635 |
| 40 | 1 | 8.319827 | -0.3486  | -0.21534 |
| 41 | 6 | 6.21033  | -0.1749  | -0.09287 |
| 42 | 8 | 5.363976 | -1.06812 | 0.361391 |

---

---

|    |    |          |          |          |
|----|----|----------|----------|----------|
| 43 | 8  | 6.068913 | 1.03553  | -0.00949 |
| 44 | 8  | -4.27753 | 1.077261 | -1.19431 |
| 45 | 6  | -3.73728 | -0.62825 | -0.74837 |
| 46 | 1  | -2.78867 | -0.47105 | -0.26188 |
| 47 | 6  | -3.91452 | 0.003379 | -2.04703 |
| 48 | 1  | -4.72699 | -0.35725 | -2.67901 |
| 49 | 1  | -3.25645 | 2.107543 | -0.83219 |
| 50 | 16 | -2.456   | -3.02188 | -1.48825 |
| 51 | 1  | -3.33147 | -3.72462 | -0.74042 |
| 52 | 6  | -4.7966  | -1.2511  | 0.040506 |
| 53 | 6  | -6.04078 | -1.59015 | -0.50963 |
| 54 | 6  | -4.55936 | -1.51429 | 1.397147 |
| 55 | 6  | -7.01922 | -2.18105 | 0.280024 |
| 56 | 1  | -6.24184 | -1.39644 | -1.55525 |
| 57 | 6  | -5.53794 | -2.10808 | 2.185561 |
| 58 | 1  | -3.59763 | -1.25651 | 1.825678 |
| 59 | 6  | -6.77122 | -2.44416 | 1.628254 |
| 60 | 1  | -7.97676 | -2.44126 | -0.15517 |
| 61 | 1  | -5.34094 | -2.30842 | 3.231958 |
| 62 | 1  | -7.53578 | -2.90803 | 2.240081 |
| 63 | 1  | -3.00293 | 0.150007 | -2.6301  |

---

---

| Components |   |          | Pro-1b   |          |
|------------|---|----------|----------|----------|
| 1          | 7 | 3.514108 | 2.104664 | 0.086858 |
| 2          | 6 | 3.99819  | 2.924415 | -1.02448 |
| 3          | 1 | 5.060223 | 3.134577 | -0.87957 |
| 4          | 1 | 3.881324 | 2.371699 | -1.9587  |
| 5          | 1 | 3.470532 | 3.884271 | -1.11693 |
| 6          | 6 | 3.668598 | 2.775665 | 1.378913 |
| 7          | 1 | 3.307792 | 2.116422 | 2.170455 |
| 8          | 1 | 4.727641 | 2.977184 | 1.554199 |
| 9          | 1 | 3.125292 | 3.728922 | 1.438967 |
| 10         | 6 | 2.17317  | 1.554895 | -0.12535 |
| 11         | 1 | 2.1883   | 0.96502  | -1.04523 |
| 12         | 1 | 1.958335 | 0.866076 | 0.691879 |
| 13         | 6 | 1.019249 | 2.552203 | -0.21113 |
| 14         | 1 | 0.947079 | 3.155323 | 0.703383 |
| 15         | 1 | 1.131653 | 3.237519 | -1.06152 |
| 16         | 8 | -0.15447 | 1.765733 | -0.36762 |
| 17         | 6 | -1.35343 | 2.524014 | -0.38599 |
| 18         | 1 | -1.44168 | 3.109359 | 0.538386 |
| 19         | 1 | -1.34748 | 3.224526 | -1.2313  |
| 20         | 6 | -2.48616 | 1.508772 | -0.50847 |

---

---

|    |   |          |          |          |
|----|---|----------|----------|----------|
| 21 | 1 | -2.42528 | 0.804774 | 0.323395 |
| 22 | 1 | -2.34519 | 0.940037 | -1.43136 |
| 23 | 7 | -3.85519 | 2.051245 | -0.52129 |
| 24 | 6 | -4.14935 | 2.877575 | -1.70001 |
| 25 | 1 | -5.22101 | 3.082015 | -1.73274 |
| 26 | 1 | -3.61576 | 3.835193 | -1.68651 |
| 27 | 1 | -3.86993 | 2.331725 | -2.60248 |
| 28 | 6 | -4.22681 | 2.725188 | 0.731531 |
| 29 | 1 | -3.68317 | 3.664287 | 0.884276 |
| 30 | 1 | -5.29541 | 2.947083 | 0.707643 |
| 31 | 1 | -4.0299  | 2.049127 | 1.563459 |
| 32 | 1 | -4.73629 | 0.789228 | -0.55049 |
| 33 | 6 | -7.57212 | -3.45095 | -0.48705 |
| 34 | 1 | -8.23719 | -3.46889 | -1.34999 |
| 35 | 1 | -8.17253 | -3.48641 | 0.431633 |
| 36 | 1 | -6.92171 | -4.33523 | -0.51472 |
| 37 | 8 | -6.81732 | -2.25123 | -0.5652  |
| 38 | 6 | -5.92176 | -2.12492 | 0.513238 |
| 39 | 1 | -5.20922 | -2.96217 | 0.543955 |
| 40 | 1 | -6.45147 | -2.12081 | 1.477075 |
| 41 | 6 | -5.10272 | -0.84683 | 0.450195 |
| 42 | 8 | -5.34707 | -0.07386 | -0.58049 |

---

---

|    |    |          |          |          |
|----|----|----------|----------|----------|
| 43 | 8  | -4.28775 | -0.61268 | 1.329719 |
| 44 | 8  | 5.397663 | 0.093245 | 0.3968   |
| 45 | 6  | 4.950375 | -1.40791 | -1.4296  |
| 46 | 1  | 5.877199 | -0.97043 | -1.79464 |
| 47 | 1  | 4.123284 | -0.9003  | -1.92904 |
| 48 | 6  | 4.896878 | -1.20398 | 0.089267 |
| 49 | 1  | 5.60674  | -1.90454 | 0.543346 |
| 50 | 1  | 4.678716 | 0.760707 | 0.234193 |
| 51 | 16 | 4.876662 | -3.16244 | -1.99014 |
| 52 | 1  | 6.081471 | -3.52942 | -1.50943 |
| 53 | 6  | 3.533224 | -1.42042 | 0.736039 |
| 54 | 6  | 2.402931 | -1.8604  | 0.045957 |
| 55 | 6  | 3.399561 | -1.09416 | 2.091783 |
| 56 | 6  | 1.167157 | -1.95769 | 0.686675 |
| 57 | 1  | 2.463823 | -2.11899 | -1.00214 |
| 58 | 6  | 2.170389 | -1.19028 | 2.73469  |
| 59 | 1  | 4.266968 | -0.7347  | 2.632167 |
| 60 | 6  | 1.044253 | -1.61972 | 2.030599 |
| 61 | 1  | 0.299277 | -2.28725 | 0.127393 |
| 62 | 1  | 2.087803 | -0.92392 | 3.782196 |
| 63 | 1  | 0.08248  | -1.68691 | 2.525504 |

---



---

| Components |   | Pro-1c   |          |          |
|------------|---|----------|----------|----------|
| 1          | 7 | -2.65136 | 2.938574 | -0.16105 |
| 2          | 6 | -3.03628 | 2.950158 | 1.252057 |
| 3          | 1 | -4.09141 | 3.219444 | 1.33356  |
| 4          | 1 | -2.90404 | 1.952606 | 1.675202 |
| 5          | 1 | -2.45415 | 3.661812 | 1.853357 |
| 6          | 6 | -2.79919 | 4.256793 | -0.78152 |
| 7          | 1 | -2.53011 | 4.191624 | -1.83722 |
| 8          | 1 | -3.84307 | 4.569653 | -0.71074 |
| 9          | 1 | -2.17975 | 5.030676 | -0.3073  |
| 10         | 6 | -1.3454  | 2.315576 | -0.41078 |
| 11         | 1 | -1.40755 | 1.280585 | -0.0688  |
| 12         | 1 | -1.18375 | 2.288661 | -1.49169 |
| 13         | 6 | -0.12111 | 2.976206 | 0.237027 |
| 14         | 1 | -0.01146 | 4.007205 | -0.10212 |
| 15         | 1 | -0.20778 | 2.9819   | 1.330625 |
| 16         | 8 | 1.079835 | 2.313384 | -0.15089 |
| 17         | 6 | 1.268689 | 1.041058 | 0.460271 |
| 18         | 1 | 1.161172 | 1.132725 | 1.548449 |
| 19         | 1 | 0.524197 | 0.319973 | 0.10627  |
| 20         | 6 | 2.674947 | 0.590018 | 0.07818  |

---

---

|    |   |          |          |          |
|----|---|----------|----------|----------|
| 21 | 1 | 3.411215 | 1.261026 | 0.524646 |
| 22 | 1 | 2.775552 | 0.662648 | -1.00769 |
| 23 | 7 | 3.035879 | -0.78403 | 0.470161 |
| 24 | 6 | 2.289139 | -1.81961 | -0.25869 |
| 25 | 1 | 2.740228 | -2.79203 | -0.05296 |
| 26 | 1 | 1.231975 | -1.86208 | 0.027765 |
| 27 | 1 | 2.354399 | -1.62409 | -1.33003 |
| 28 | 6 | 2.997825 | -0.9988  | 1.924562 |
| 29 | 1 | 1.979555 | -0.96286 | 2.328266 |
| 30 | 1 | 3.421998 | -1.97957 | 2.147177 |
| 31 | 1 | 3.610032 | -0.23668 | 2.406558 |
| 32 | 1 | 4.52056  | -0.89682 | 0.096983 |
| 33 | 6 | 9.490228 | -1.20151 | -1.01571 |
| 34 | 1 | 9.668413 | -2.01989 | -1.71272 |
| 35 | 1 | 10.07843 | -1.36999 | -0.10391 |
| 36 | 1 | 9.817772 | -0.2592  | -1.47459 |
| 37 | 8 | 8.098314 | -1.18401 | -0.73746 |
| 38 | 6 | 7.757384 | -0.15633 | 0.161809 |
| 39 | 1 | 8.036568 | 0.831549 | -0.23333 |
| 40 | 1 | 8.277658 | -0.27415 | 1.123451 |
| 41 | 6 | 6.268835 | -0.10969 | 0.462797 |
| 42 | 8 | 5.540072 | -0.99623 | -0.17094 |

---

---

|    |    |          |          |          |
|----|----|----------|----------|----------|
| 43 | 8  | 5.840945 | 0.72241  | 1.248446 |
| 44 | 8  | -4.45663 | 1.26088  | -1.45144 |
| 45 | 6  | -3.43392 | -0.75551 | -0.54098 |
| 46 | 1  | -2.95887 | -0.13338 | 0.216972 |
| 47 | 6  | -3.69809 | 0.117708 | -1.78292 |
| 48 | 1  | -4.26338 | -0.46046 | -2.51785 |
| 49 | 1  | -3.84961 | 1.883585 | -0.9758  |
| 50 | 16 | -2.17187 | -2.03425 | -1.0287  |
| 51 | 1  | -2.18856 | -2.71138 | 0.135774 |
| 52 | 6  | -4.69144 | -1.34746 | 0.041627 |
| 53 | 6  | -5.46871 | -2.26528 | -0.67352 |
| 54 | 6  | -5.12326 | -0.94127 | 1.305644 |
| 55 | 6  | -6.65083 | -2.76249 | -0.13545 |
| 56 | 1  | -5.14008 | -2.59851 | -1.6511  |
| 57 | 6  | -6.30783 | -1.43832 | 1.848474 |
| 58 | 1  | -4.52936 | -0.22882 | 1.867158 |
| 59 | 6  | -7.07504 | -2.35047 | 1.129066 |
| 60 | 1  | -7.24225 | -3.47346 | -0.70079 |
| 61 | 1  | -6.62824 | -1.11265 | 2.83136  |
| 62 | 1  | -7.99538 | -2.73985 | 1.548322 |
| 63 | 1  | -2.73863 | 0.390295 | -2.24121 |

---

## References:

- [1] a) S. Grimme, S. Ehrlich, L. Goerigk, *J. Comput. Chem.* **2011**, 32, 1456-1465; b) R. Sure, J. Antony, S. Grimme, *J. Phys. Chem. B* **2014**, 118, 3431-3440; c) M. J. Turner, S. Grabowsky, D. Jaytilaka, M. A. Spackman, M. J. Turner, S. Grabowsky, D. Jaytilaka, M. A. Spackman, *J. Phys. Chem. Lett.* **2014**, 55, 4249-4255; d) Z. Li, K. Su, J. Ren, D. Yang, B. Cheng, C. K. Kim, X. Yao, Z. Li, K. Su, J. Ren, D. Yang, B. Cheng, C. K. Kim, X. Yao, *Green Chem.*, **2018**, 20, 863-872.
- [2] M. J. Frisch, G. W. Trucks, H. B. Schlegel, G. E. Scuseria, M. A. Robb, J. R. Cheeseman, J. A. Montgomery, Jr., T. Vreven, K. N. Kudin, J. C. Burant, J. M. Millam, S. S. Iyengar, J. Tomasi, V. Barone, B. Mennucci, M. Cossi, G. Sc almani, N. Rega, G. A. Petersson, H. Nakatsuji, M. Hada, M. Ehara, K. Toyota, R. Fukuda, J. Hasegawa, M. Ishida, T. Nakajima, Y. Honda, O. Kitao, H. Nakai, M. Klene, X. Li, J. E. Knox, H. P. Hratchian, J. B. Cross, V. Bakken, C. Adamo, J. Jaramillo, R. Gomperts, R. E. Stratmann, O. Yazyev, A. J. Austin, R. Cammi, C. Pomelli, J. Ochterski, P. Y. Ayala, K. Morokuma, G. A. Voth, P. Salvador, J. J. Dannenberg, V. G. Zakrzewski, S. Dapprich, A. D. Daniels, M. C. Strain, O. Farkas, D. K. Malick, A. D. Rabuck, K. Raghavachari, J. B. Foresman, J. V. Ortiz, Q. Cui, A. G. Baboul, S. Clifford, J. Cioslowski, B. B. Stefanov, G. Liu, A. Liashenko, P. Piskorz, I. Komaromi, R. L. Martin, D. J. Fox, T. Keith, M. A. Al Laham, C. Y. Peng, A. Nanayakkara, M. Challacombe, P. M. W. Gill, B. G. Johnson, W. Chen, M. W. Wong, C. Gonzalez, J. A. Pople, GAUSSIAN 03, Gaussian, Inc., Pittsburgh, PA, **2009**.
